# Supplementary material for: Appraisal of Clinical Care Practices for Child Obesity Treatment. Part I: Interventions
Source: Oxford University Press journal article supplement (doi:10.1542/peds.2022-060642), 2023-01-09
Supplement: peds_2022060642supplementarydata1.docx [file peds_2022060642supplementarydata1.docx]

CLEAN: 7/23/22

**Appendix 1. Framework and key questions**

**Appendix 2: Search strategy Pubmed:**

| #1 | child[mh] OR child, preschool[mh] OR child*[tiab] OR adolescent[mh] OR adolesc*[tiab] |
| --- | --- |
| #2 | obese[title] OR obesity[title] OR obesity[mh] OR overweight[title] OR overweight[mh] OR bmi[title] OR body mass index[title] OR adiposity[title] OR body composition[title] OR weight status[title] |
| #3 | clinic[tiab] OR clinics[tiab] OR clinician*[tiab] OR primary care[tiab] OR specialty care[tiab] OR hospital*[tiab] OR physician*[tiab] OR treatment[tiab] OR screening[tiab] |
| #4 | #1 AND #2 AND #3 (Filters: English) |
| #5 | cardiovascular diseases[mh] OR metabolic syndrome[mh] OR cholesterol[mh] OR triglycerides[mh] OR hypertension[mh] OR glycated hemoglobin a[mh] OR blood glucose[mh] OR liver function tests[mh] OR depression[mh] OR sleep apnea[mh] OR asthma[mh] |
| #6 | prevalence[mh]) OR risk assessment[mh] OR severity of illness index[mh] |
| #7 | #1 AND #2 AND #3 AND #4 (Filters: English) |
| Final | #4 OR #7 |

**CENTRAL:**

(obese or obesity or overweight or BMI or "body mass index":ti) and (obese or obesity or overweight:ti,ab,kw) and (child or teen or adolescent or youth:ti,ab,kw) and (clinic or clinician or primary care or specialty care or hospital or physician or doctor or health care or medical or treatment or screening:ti,ab,kw) in Trials (Word variations have been searched)

**Appendix 3: Inclusion Criteria**

**Inclusion Criteria for Intervention Studies (KQ1)**

| **Component** | **Inclusion** | **Exclusion** | **Rationale** |
| --- | --- | --- | --- |
| Study Aim | Primary study aim is to examine the  effect of a prevention or treatment intervention on weight or weight- related behaviors. | Primary study aim to prevent  development of a comorbidity (eg, hypertension).  Primary study aim is to examine treatment for a comorbidity (eg, NAFLD).  Primary study aim is to examine prevention or treatment for obesity caused by external factors (eg, antipsychotic treatment). | Although prevention of comorbidities  is important, the goal of this review is to provide actionable evidence for obesity prevention and treatment.  Although we want to understand treatment for children who have comorbidities, we want to maintain focus on treatments that can be broadly applied. |
| Study Design | Tests an intervention. Randomized  or nonrandomized comparison group. | Case reports, protocols, abstracts,  systematic reviews, meta-analyses, or other non-peer-reviewed articles.  Pre-post within-group design (ie, a single group measured before and after treatment).  Compares groups without an intervention (eg, activity levels between those with and without obesity). | Comparison groups particularly  important for obesity, which can have large regression to the mean effects. |
| Population | Children age 2-18. Studies can  include young adults up to age 25 if combined with adolescents, or older ages if children are reported separately. | Study sample is all ages <2 years or  ≥18 years. Study sample is only young adults.  Children with exogenous obesity, such as attributable to Prader-Willi syndrome, | Want to include studies that span  the adolescent to adult transition, a group treated by pediatric providers, but not studies where the primary  ages would not be treated by pediatric providers. |

| **Component** | **Inclusion** | **Exclusion** | **Rationale** |
| --- | --- | --- | --- |
|  | Children may have other conditions (eg, asthma). | medication (eg, antipsychotics), or known genetic mutations. |  |
| Intervention | Intervention can consist of screening, lifestyle counseling, other specific strategies, medically managed weight loss, pharmaceutical treatment, and surgery. Complementary and alternative medicine approaches will be considered if they meet other criteria. | Intervention does not target obesity as a primary outcome.  Intervention targets treatments for specific comorbidities  Intervention is outside the scope of clinical practice. | Goal is to provide actionable evidence for pediatric providers regarding obesity, not guidance on treating comorbidities, which is covered by other guidelines. |
| Comparator | Comparator is any usual care or  intervention that can occur in a clinical setting.  Comparison group must be similar (eg, no healthy weight controls). | Comparator is outside of the scope  of clinical practice (eg, comparing clinical treatment to community-only program). | USPSTF required usual or minimal  care control groups. In contrast, we are not creating a combined effect size, and current “usual care” may be more intense than a single visit. Unethical at this point to have a comparator with no healthy lifestyle focus. |
| Outcome | Primary outcomes must be obesity.  Acceptable measures include any BMI-based measure (including SDS, percentiles, relative BMI), or weight.  Secondary outcomes will be assessed, and can include any CM risk outcome; mental health or QoL;  others; behavioral outcomes. Any adverse event. | Weight and height are not clinically  measured (eg, self or parent report).  Primary outcome is not obesity (eg, primary outcome is reduction in hypertension, although BMI is reported). |  |

| **Component** | **Inclusion** | **Exclusion** | **Rationale** |
| --- | --- | --- | --- |
|  |  |  |  |
| Timing | Outcomes must be measured 3  months (12 weeks) or more after intervention onset. |  |  |
| Setting | Must be health-care system based  or within the scope of health care practice.  Community programs can be included only if there is clinic involvement beyond referral alone (eg, some defined and required clinic follow-up). | Studies include health care  providers only for referral.  Studies entirely outside the scope of health care. | Goal is to provide evidence that can  be used in clinical pediatric practice. |
| Country | OECD member countries: Australia, Austria, Belgium, Canada, Chile, Czech Republic, Denmark, Estonia, Finland, France, Germany, Greece, Hungary, Iceland, Ireland, Israel, Italy, Japan, Korea, Luxembourg, Mexico, The Netherlands, New Zealand, Norway, Poland, Portugal, Slovak Republic, Slovenia, Spain, Sweden, Switzerland, Turkey, United Kingdom, and United States |  |  |
| Language | English |  |  |

**Inclusion Criteria for Comorbidity Studies (KQ2)**

| **Component** | **Inclusion** | **Exclusion** | **Rationale** |
| --- | --- | --- | --- |
| Study Aim | Primary study aim is to compare dyslipidemia, hypertension, diabetes, liver function, depression, sleep apnea, or asthma between healthy weight children and those with obesity, or to compare comorbidities by different levels of obesity. | Primary study aim is to report prevalence of comorbidities among a population with obesity with no comparisons. Primary study aim differs, with incidental prevalence reporting. | Goal is to provide evidence that helps clinicians decide on comorbidity screening. |
| Study Design | Any study comparing comorbidities across weight status groups. No specific design limitation. | Case reports, protocols, abstracts, systematic reviews, meta-analyses, or other non- peer-reviewed articles. |  |
| Population | Children ages 2-18. Studies can  include young adults up to age 25 if combined with adolescents, or older ages if children are reported separately.  Children may have other conditions (eg, asthma). | Study sample is all ages <2  years or ≥18 years. Study sample is only young adults.  Children with exogenous obesity, such as due to Prader-Willi, medication (eg, antipsychotics), or known genetic mutations. | Want to include studies that  span the adolescent to adult transition, a group treated by pediatric providers, but not studies where the primary ages would not be treated by pediatric providers. |
| Intervention | No requirement. |  |  |
| Comparator | Comorbidity prevalence must  be compared either with/without obesity or by severity of obesity, using a  BMI-based measure. | Obesity defined using waist  circumference, DEXA, or other non-BMI measures. | Goal is to provide evidence  that helps clinicians decide on comorbidity screening. |

|  |  |  |  |
| --- | --- | --- | --- |
| Outcome/Comorbidity Measures | Lipids: HDL, LDL, triglycerides, total cholesterol; diagnosed unspecified dyslipidemia  Blood pressure: Ambulatory systolic or diastolic; diagnosed hypertension  Liver: ALT, AST; diagnosed NAFLD  Glucose metabolism: HbA1c, fasting glucose, insulin, HOMA-IR; diagnosed prediabetes or diabetes; metabolic syndrome  Obstructive sleep apnea: Diagnosed OSA (from chart or self-report); OSA on sleep study  Asthma: Diagnosed asthma (from chart or self-report)  Depression: diagnosed depression; standard depression inventory (eg, BDI, CES-D) | Lipids: other lipid molecules  Blood pressure: 24-hour continuous monitoring  Liver: Distribution of fat in the liver without diagnosis  Glucose metabolism: other non-standard measures  Obstructive sleep apnea: Self- reported “disturbed sleep”; other sleep difficulties  Asthma: Specific lung function parameters only; self-reported “wheezing”  Depression: Other mental health diagnoses; other behavioral screens |  |
| Timing | BMI and comorbidity must be measured contemporaneously |  |  |
| Setting |  |  |  |

|  | Any |  |  |
| --- | --- | --- | --- |
| Country | OECD member countries: Australia, Austria, Belgium, Canada, Chile, Czech Republic, Denmark, Estonia, Finland, France, Germany, Greece, Hungary, Iceland, Ireland, Israel, Italy, Japan, Korea, Luxembourg, Mexico, The Netherlands, New Zealand, Norway, Poland, Portugal, Slovak Republic, Slovenia, Spain, Sweden, Switzerland, Turkey, United Kingdom, and United States |  |  |
| Language | English |  |  |

Appendix 4. Full text review guide

APPENDIX 5 – SEE SEPARATE DOCUMENT
