# Supplementary material for: Appraisal of Clinical Care Practices for Child Obesity Treatment. Part I: Interventions
Source: Oxford University Press journal article supplement (doi:10.1542/peds.2022-060642), 2023-01-09
Supplement: peds_2022060642supplementarydata2.docx [file peds_2022060642supplementarydata2.docx]

**APPENDIX 5**

#

# Randomized Lifestyle Studies (Priority 1)

**Akgul Gundogdu, N.; Sevig, E. U.; Guler, N.**

**The effect of the solution-focused approach on nutrition-exercise attitudes and behaviours of overweight and obese adolescents: Randomised controlled trial**

| Study  Identification |  |  |  |
| --- | --- | --- | --- |
| Sponsorship  source | Internal (University) support |  |  |
| Country | Turkey |  |  |
| Methods | | | |
| Design | Randomized controlled trial |  |  |
| Group | Parallel group |  |  |
| Outcomes other  than BMI | Other Obesity, glucose metabolism, lipids, behaviors |  |  |
| IRB | Approval was obtained from the Ethics Committee of University Clinical Studies. Adolescents and their families were informed and written consent was  obtained. | | |
| Population | | | |
| Inclusion criteria | 12-13 years (14 initially included, but later excluded), no diagnosed metabolic disease, could communicate, did not have any condition (disability, cardiac  reasons, etc) hindering them from performing exercise, overweight or obese (BMI>=85th) | | |
| Exclusion criteria | Could not continue to the end, had a metabolic disease, w ere using metformin, or moved out of the city | |  |
| Group differences | Randomized |  |  |
| Special  populations | None |  |  |
|  | Solution-Focused Approach (SFA) Interviews | Usual Care | Overall |
| N enrolled | 16 | 16 | 32 |
| Sex | 62.5% female, 37.5% male | 43.7% female, 56.3% male | NR |
| Age (mean and range) | 12.62 | 12.68 | NR |
| Race | NR | NR | NR |
| BMI-SDS | 2.96 (2.52-3.33) | 3.10 (2.68-3.23) | NR |
| Interventions | |  |  |
|  | Solution-Focused Approach (SFA) Interviews | Usual Care |  |
| Intervention as defined by author | Solution-focused interview s about the adolescents' nutrition and exercise behaviors, their habits they w anted to change, and how to  do it. | The control group received no intervention. The adolescents in the control group continued to receive monthly and three-monthly routine care in the polyclinic. In polyclinic care, routine diagnostic examinations of the adolescents were conducted and their treatments were given  by their doctors. |  |
| Intervention Type | Lifestyle | Usual Care |  |
| Intervention  Length | 6 months | 6 months |  |
| Intensity as  described by authors | Eight interview s, 30-45 minutes, every two weeks | The adolescents in the control group continued to receive monthly and three-monthly routine care in the polyclinic |  |
| Assigned intensity | 5-25 hours | 5-25 hours |  |
| Provider type | Subspecialist, other | Subspecialist |  |
| Clinic setting | Specialty clinic | Specialty clinic |  |
| Components | Nutrition counseling, activity counseling, motivational interviewing | Usual care only |  |

| Outcomes |
| --- |
| BMI |

|  | 1  month |  |  |  |  | 6  months |  |  |  |  |
| --- | --- | --- | --- | --- | --- | --- | --- | --- | --- | --- |
|  | median | IQR (low er  bound) | IQR (upper  bound) | p (w ithin  group) | p (betw een  groups) | median | IQR (low er  bound) | IQR (upper  bound) | p (w ithin  group) | p (betw een  groups) |
| Solution-Focused Approach  (SFA) Interview s | 30.85 | 27.99 | 33.92 | - | - | 27.68 | 24.8 | 30.27 | <0.001 | <0.001 |
| Usual Care | 30.87 | 28.07 | 33.69 | - | - | 32.16 | 30.2 | 35.12 | 0.02 | - |
| BMI-SDS |  |  |  |  |  |  |  |  |  |  |
|  | 1  month |  |  |  |  | 6  months |  |  |  |  |
|  | median | IQR (low er bound) | IQR (upper bound) | p (w ithin group) | p (betw een groups) | median | IQR (low er bound) | IQR (upper bound) | p (w ithin group) | p (betw een groups) |
| Solution-Focused Approach  (SFA) Interview s | 2.96 | 2.52 | 3.33 | <0.001 | - | 2.42 | 1.73 | 2.74 | <0.001 | <0.001 |
| Usual Care | 3.1 | 2.68 | 3.23 | - | - | 3.1 | 2.74 | 3.35 | 0.338 | - |

**Anderson, Yc; Wynter, Le; Grant, Cc; Cave, Tl; Derraik, Jgb; Cutfield, Ws; Hofman, Pl**

**A Novel Home-Based Intervention for Child and Adolescent Obesity: the Results of the Whanau Pakari Randomized Controlled Trial**

| Study  Identification |  |  |  |
| --- | --- | --- | --- |
| Sponsorship  source | This w ork w as supported by grants from the Health Research Council of New Zealand, the Royal Australasian College of Physicians, the Maurice and Phyllis  Paykel Trust, the Taranaki Medical Foundation, and Lotteries Health Research Committee. | | |
| Country | New Zealand |  |  |
| Methods | | | |
| Design | Randomized controlled trial |  |  |
| Group | Parallel group |  |  |
| IRB | Ethics approval w as granted by the Central Health and Disability Ethics Committee (New Zealand) (CEN/11/09/ 054). Written and verbal inf ormed consents w ere  obtained from all participants or their guardians. | | |
| Outcomes other than  BMI | Other obesity, Glucose metabolism, Psychosocial, Mental Health, Behaviors |  |  |
| Population | | | |
| Inclusion  criteria | Eligible participants (recruited January 2012-August 2014) w ere aged 5 to 16 years and had BMI>98th percentile or>91st percentile w ith w eight-related  comorbidities. | |  |
| Exclusion  criteria | Exclusion criteria included significant medical or psychological conditions leading to an inability to undertake physical activity or participate in group sessions, a  lack of “readiness” to make lifestyle changes based on a quantitative and qualitative assessment, and the absence of a committed family member | | |
| Group  differences | Randomized |  |  |
| Special  populations | None |  |  |
|  | Whanau Pakari Intervention | Control ("Minimal Treatment") | Overall |
| N | 69 | 69 | 138 |
| Sex | 49% f, 51% m | 58% f, 42% m | NR |
| Age | 10.7 (3.0) | 10.3 (3.2) | NR |
| Race | 45% Maori, 41% New Zealand European, 14% other | 42% Maori, 48% New Zealand European, 10% Other | NR |
| BMI SDS | 3.08 (0.58) | 3.05 (0.57) | NR |
| Interventions | |  |  |
|  | Whanau Pakari Intervention | Control ("Minimal Treatment") |  |
| Intervention as defined by author | Received 6-month follow -up w ith home visits and assessments w ith advice, as w ell as a multidisciplinary team meeting review w ith pediatrician oversight to address any identified w eight-related comorbidities. Those in the intensive intervention group also participated in a 12-month multi- disciplinary program w ith w eekly group sessions delivered by a physical  activity coordinator, dietitian, and psychologist. | Both groups received 6-month follow -up w ith home visits and assessments w ith advice, as w ell as a multidisciplinary team meeting review w ith pediatrician oversight to address any identified w eight-related comorbidities. |  |
| Intervention  type | Lifestyle | Lifestyle |  |
| Intervention  Length | 12 months | 12 months |  |
| Intensity as  described by authors | 12-month multi-disciplinary program w ith w eekly group session | Participants in both groups receiving comprehensive assessments and advice at each 6-month follow -up for 2 years. |  |
| Assigned  intensity | >=52 hours | <5 hours |  |
| Provider  types | Primary care, nutrition provider, mental health, exercise | Primary care, nutrition |  |
| Clinic setting | Primary care | Primary care |  |

| Components | Nutrition counseling, activity counseling, nutrition training, activity training,  mental health, community recreation center | Nutrition counseling, activity counseling |
| --- | --- | --- |

| Outcomes |  |  |  |  |  |  |  |  |  |  |
| --- | --- | --- | --- | --- | --- | --- | --- | --- | --- | --- |
| BMI SDS |  |  |  |  |  |  |  |  |  |  |
|  | 6  months |  |  |  |  | 12  months |  |  |  |  |
|  | N | Mean | CI (low er  bound) | CI (upper  bound) | p (across  groups) | N | Mean | CI (low er  bound) | CI (upper  bound) | p (across  groups) |
| Whanau Pakari  Intervention | 78 | -0.13 | -0.19 | -0.06 | NS | 69 | -0.1 | -0.19 | -0.02 | NS |
| Control ("Minimal Treatment") | 72 | -0.08 | -0.15 | -0.02 | - | 69 | -0.12 | -0.2 | -0.03 | - |

**Arauz, Boudreau Ad; Kurowski, Ds; Gonzalez, Wi; Dimond, Ma; Oreskovic, Nm Latino families, primary care, and childhood obesity: a randomized controlled trial**

| Study  Identification |  |  |  |
| --- | --- | --- | --- |
| Sponsorship  source | Robert Wood Johnson Foundation, Massachusetts General Hospital Multicultural Affairs Career Development Aw ard |  |  |
| Country | USA |  |  |
| Methods | | | |
| Design | Randomized controlled trial |  |  |
| Group | Parallel group |  |  |
| IRB | This study w as approved by the Partners IRB. |  |  |
| Outcomes other  than obesity | Other labs, lipids, glucose metabolism, psychosocial, behaviors |  |  |
| Population | | | |
| Inclusion criteria | Eligible participants w ere 1) Latino children 2) ages 9–12 years w ho w ere 3) overw eight or obese (age- and gender-specifıc BMI in the 85th–94th and95th  percentile, respectively) w ho received primary care at a single community health center | | |
| Exclusion criteria | Children w ith chronic diseases other than asthma w ere excluded. |  |  |
| Group differences | Randomized |  |  |
| Special  populations | Latino |  |  |
|  | Pow er Up (Intervention) | Waitlist control | Overall |
| N | 14 | 12 | 26 |
| Sex | 35.7% male, 64.3% female | 41.7% male, 58.3%  female | NR |
| Age (mean and range) | 10.2 | 10.4 | NR |
| Race | Hispanic (64.3% 1st immigrant generation) | Hispanic (41.7% 1st immigrant  generation) | 100%  Latino |
| BMI-SDS | 2 | 2.2 | NR |
| Interventions | |  |  |
|  | Pow er Up (Intervention) | Waitlist control |  |
| Intervention as defined by author | The intervention consisted of tw o components: (1) Pow er Up classes that educated children and caregivers about healthy  behav-iors surrounding nutrition, activity, and stress management and(2) culturally sensitive coaching to empow er families to incorporate learned behaviors and address both family and social barriers to lifestyle changes. | Usual care |  |
| Intervention type | Lifestyle | NA |  |
| Intervention  Length | 6 months | NA |  |
| Intensity as described by authors | Pow er Up is a 1.5-hour interactive curriculum for overw eight/obese children and their caregivers of -fered at an urban community health center during early evening hours. Classes w ere conducted in fıve consecutive w eekly sessions, w ith a sixth 3 months later. + All families met w ith the coach in person at least once, follow ed by periodic in-person or phone meetings during the 6 months after enrollment. Home visits w ere offered and families w ere encouraged to have contact  w ith the coach at least monthly; how ever, each family’s pref erences and needs dictated the setting and timing of meetings | NA |  |
| Assigned intensity | 5-25 hours | NA |  |
| Provider types | Primary care, nutrition provider, exercise, other (health educator) | NA |  |
| Components | Nutrition counseling, activity counseling, activity training, motivational interview ing, community health center | Usual care only |  |

| Outcomes |  | | |
| --- | --- | --- | --- |
| BMI SDS |  |  |  |
|  | 6 months  N | Mean | SD p (w ithin group) p (betw een groups) |
| Pow er Up (Intervention) | 13 | -0.03 | 0.14 0.05 1 |
| Waitlist control | 10 | -0.05 | 0.08 0.13 |

**Armstrong, S.; Mendelsohn, A.; Bennett, G.; Taveras, E. M.; Kimberg, A.; Kemper, A. R.**

**Texting Motivational Interviewing: A Randomized Controlled Trial of Motivational Interviewing Text Messages Designed to Augment Childhood Obesity Treatment**

| Study  Identification |  |  |  |
| --- | --- | --- | --- |
| Sponsorship  source | None listed |  |  |
| Country | USA |  |  |
| Methods | | | |
| Design | Randomized controlled trial |  |  |
| Group | Parallel group |  |  |
| IRB | The Duke MedicalCenter Institutional Review Board approved all procedures(Pro00050555) and w e registered the trial on Clinical-trials.gov  (NCT01989065). | | |
| Outcomes other  than BMI | Behaviors, other |  |  |
| Population | | | |
| Inclusion criteria | Eligibility criteria included age 5–12 years and BMI>=95th percentile adjusted for age and sex. | |  |
| Exclusion criteria | We excluded participants w ith an underlying medical condition leading to obesity (endocrine or genetic disorder, or currently on a medication know n to cause  w eight gain), w hose parents or guardians did not have access to or ow n a cell phone, or w ho w ere unable to read and w rite in English. | | |
| Group differences | Randomized |  |  |
| Special  populations | None |  |  |
|  | Intervention (Texting + Healthy Lifestyles) | Control (Healthy Lifestyles only) | Overall |
| N | 47 | 54 | 101 |
| Sex | 36.2% male | 40.7% male | 38.6% male |
| Age (mean and  range) | 10.7 | 9.4 | 9.9 |
| Race | 53.2% black, 23.4% w hite, 23.4% other; 17.0% Hispanic | 42.6% black, 35.2% w hite, 21.4% other; 20.4% Hispanic | 47.5% black, 29.7% w hite, 22.8% other;  18.8% Hispanic |
| BMI (no z  reported) | 29.1 | 28.9 | 30.5 |
| Interventions | |  |  |
|  | Intervention (Texting + Healthy Lifestyles) | Control (Healthy Lifestyles only) |  |
| Intervention as defined by author | Parent participants randomized to the intervention group received usual care plus daily ( Monday–Friday) text messages on their designated mobile device for 12  w eeks. | Control group received standard care, w hich included monthly  lifestyle counseling visits by a physician and dietician. Standard care participants received text message reminders for the 3-month study outcomes visit. |  |
| Intervention type | Lifestyle | Lifestyle |  |
| Intervention  Length | 12 w eeks | 12 w eeks |  |
| Intensity as  described by authors | Usual care + daily ( Monday–Friday) text messages on their designated mobile device for 12 w eeks | Monthly lifestyle counseling visits, text message reminders for the 3- month study outcomes visit |  |
| Assigned  Intensity | <5 hours | <5 hours |  |
| Provider types | Primary care, nutrition provider | Primary care, nutrition provider |  |
| Clinic setting | Multidisciplinary w eight management program | Multidisciplinary w eight management program |  |
| Components | Nutrition counseling, activity counseling, other (texting) | Nutrition counseling, activity counseling |  |

| Outcomes |  |  |  |  |  |
| --- | --- | --- | --- | --- | --- |
| BMI SDS |  |  |  |  |  |
|  | 6 months |  |  |  |  |
|  | N | Median | IQR (low er bound) | IQR (upper bound) | p (betw een groups) |
| Intervention (Texting + Healthy Lifestyles) | 47 | 0.1 | 0 | 0.2 | 0.2 |
| Control (Healthy Lifestyles only) | 54 | 0 | -0.1 | 0.1 | - |

**Baan-Slootweg, O; Benninga, Ma; Beelen, A; Palen, J; Tamminga-Smeulders, C; Tijssen, Jg; Aalderen, Wm Inpatient treatment of children and adolescents with severe obesity in the Netherlands: a randomized clinicaltrial**

| Study  Identification |  |  |  |
| --- | --- | --- | --- |
| Sponsorship  source | None listed |  |  |
| Country | The Netherlands |  |  |
| Methods | | | |
| Design | Randomized controlled trial |  |  |
| Group | Parallel group |  |  |
| IRB | The study protocol w as approved by the Medical Ethics Committee of the Academic Medical Center of the University of Amsterdam. Assent and w ritten  inf ormed consent w ere obtained from the parents or the legal representatives of participants and from adolescents (aged 12-18 years). Parents and/or caregivers gave additional w ritten consent to participate in their children’s treatment and educational regimens | | |
| Outcomes  other than BMI | Other obesity, blood pressure, lipids, other labs, glucose metabolism, other (CV fitness) | |  |
| Population | | | |
| Inclusion criteria | Inclusion criteria w ere 8 to 18 years of age and a BMI z score of at least 2.3, corresponding to the 98.9th percentile, according to the grow th curves based on the fourth Dutch National Grow th Study of 1997 (calculated via [http://groeiw](http://groeiw/) eb.pgdata.n /calculator.asp), w ith obesity-related comorbidity (eg, obstructive sleep apnea syndrome, elevated insulin levels, type 2 diabetes mellitus, liver function disorders, hypertension, dyslipidemia, joint problems) or a BMI z score of at  least 3.0 (corresponding to the 99.9th percentile). | | |
| Exclusion criteria | Exclusion criteria consisted of severe psychiatric disorder, intellectual dis-ability, obesity caused by endocrine disorders (eTable in the Supplement), use of medication that could cause significant w eight gain or w eight loss, and/or participation in a concomitant w eight management program | | |
| Group  differences | Randomized |  |  |
| Special  populations | Severe obesity |  |  |
|  | Ambulatory Treatment | Inpatient Treatment | Overall |
| N | 45 | 45 | 90 |
| Sex | 58% female, 42% male | 58% female, 42% male | 58%  female, 42%  male |
| Age (mean and  range) | 13.9 | 13.8 | NR |
| Race | 71% Netherlands, 29% other | 49% Netherlands, 51% other | NR |
| BMI SDS | 3.35 | 3.35 | NR |
| Interventions | |  |  |
|  | Ambulatory Treatment | Inpatient Treatment |  |
| Intervention as defined by author | Patients randomized to the ambulatory treatment pro-gram and their caregivers attended the program for 12 visits at increasing time intervals for a 6-month period. After w eighing, the children exercised for an hour (sw imming and gymnastics). Children and parents w ere also encouraged to exercise at home on 3 additional days per w eek and to reduce sedentary behaviors. After physical exercise, the children at-tended an educational program for 1 hour and a nutritional educational session for half an hour. | Patients randomized to the inpatienttreatment program w ere hospitalized for 26 w eeks. They fol-low ed a program during w eekdays and returned home for the w eekends w ith homew ork assignments. The program consisted of an exercise schedule 4 days per w eek (30 to 60 minutes each day, w ith a mean duration of 45 minutes for each exercise session) and nutrition/behavior modification once per w eek (60 minutes for each session). Patients and caregivers received comparable inf ormation about nutrition and behavior, but the 1-hour lessons w ere held separately, at 3  times during the treatment period |  |
| Intervention  type | Lifestyle | Lifestyle |  |

| Intervention  Length | 6 months | 6 months |
| --- | --- | --- |
| Intensity as described by authors | 12 visits, including 1-hour activity + 1 hour nutrition education | exercise schedule 4 days per w eek (30 to 60 minutes each day, w ith a mean duration of 45 minutes for each exercise session) and nutrition/behavior modification once per w eek (60 minutes for each  session). |
| Assigned Intensity | 5-25 hours | >=52 hours |
| Provider types | Primary care, nutrition provider, mental health, exercise | Primary care, nutrition provider, mental health, pyschosocial support,  exercise |
| Clinic Setting | Primary care | Inpatient |
| Components | Nutrition counseling, activity counseling, activity training, nutrition  training, mental health, community recreation center | Nutrition counseling, activity counseling, activity training, CBT,  psychosocial ref errals |

| Outcomes |  |  |  |  |  |  |  |  |  |  |
| --- | --- | --- | --- | --- | --- | --- | --- | --- | --- | --- |
| BMI SDS |  |  |  |  |  |  |  |  |  |  |
|  | 6 months |  |  |  | 30 months | |  |  |  |  |
|  | N | Mean | SD | p (w ithin group) | p (betw een groups) | N | Mean | SD | p (w ithin group) | p (betw een groups) |
| Ambulatory Treatment | 38 | 3 | 0.83 | 0.001 | 0.04 | 28 | 3.3 | 1.17 | 0.99 | 0.33 |
| Inpatient Treatment | 41 | 2.74 | 0.8 | 0.001 | - | 31 | 3.13 | 1.1 | 0.38 | - |

**Banks, J; Sharp, Dj; Hunt, Lp; Shield, Jp**

**Evaluating the transferability of a hospital-based childhood obesity clinic to primary care: a randomised controlled trial**

| Study  Identification |  |  |  |
| --- | --- | --- | --- |
| Sponsorship  source | National Institute for Health Research |  |  |
| Country | United Kingdom |  |  |
| Methods | | | |
| Design | Randomized controlled trial |  |  |
| Group | Parallel group |  |  |
| IRB | Willing participants gave verbal consent over the phone and w ere randomized. Written consent w as collected at the first appointment. Ethical approval granted  by Southmead Research Ethics Committee. | | |
| Outcomes other  than BMI | Psychosocial |  |  |
| Population | | | |
| Inclusion criteria | 5-16 years old w ith a BMI >= 98th centile and ref erred from the Care Of Childhood Obesity Clinic. | |  |
| Exclusion  criteria | NR directly, but clinical comorbidities and parental type 2 diabetes (although these children w ere later allow ed in to the program) | |  |
| Group  differences | Randomized |  |  |
| Special populations | None |  |  |
|  | Hospital Based (BRHC) | Primary Care (PCC) | Overall |
| N | 26 | 42 | 68 |
| Sex | 42% male | 36% male | 38%  male |
| Age (mean and  range) | 11.5 | 11.4 (5.7-17.0) | NR |
| Race | NR | NR | NR |
| BMI SDS | 2.86 | 3.17 | NR |
| Interventions | |  |  |
|  | Hospital Based (BRHC) | Primary Care (PCC) |  |
| Intervention as defined by author  Intervention type | Initial consultation w ith the COCO consultant. They w ere offered a further 4 COCO appointments over a 1-year period at 3-monthly intervals, w here they w ould also see a dietician and/or exercise specialist as directed by the consultant  Lifestyle | PCC patients w ere offered 5 appointments over 12 months; at each appointment the family saw the practice nurse w ho w eighed and measured the child, plotting the data on grow th charts. The nurse discussed overall progress, focusing on factors that  facilitated or inhibited w eight reduction. The family then saw the dietician and exercise consultant for specialist advice  Lifestyle |  |
| Intervention Length | 12 months | 12 months |  |
| Intensity as  described by authors | Four COCO appointments over 1 year | 5 appointments over 12 months |  |
| Assigned Intensity | 5-25 hours | 5-25 hours |  |
| Provider types | Nutrition provider, Exercise, subspecialist | Primary care, nutrition provider, exercise |  |
| Clinic setting | Multidisciplinary w eight management clinic | Primary care |  |
| Components | Nutrition counseling, activity counseling | Nutrition counseling, activity counseling |  |

| Outcomes |  |  |  |  |
| --- | --- | --- | --- | --- |
| BMI SDS |  |  |  |  |
| 12 months | | | | |
|  | N | Mean | SD | p (betw een groups) |
| Hospital Based (BRHC) | 23 | -0.15 | 0.25 | NS |
| Primary Care (PCC) | 29 | -0.17 | 0.26 | - |

**Bathrellou, E; Yannakoulia, M; Papanikolaou, K; Pehlivanidis, A; Pervanidou, P; Kanaka-Gantenbein, C; Tokou, I; Tsiantis, J; Chrousos, Gp; Sidossis, Ls Parental involvement does not augment the effectiveness of an intense behavioral program for the treatment of childhood obesity**

| Study  Identification |  |  |  |
| --- | --- | --- | --- |
| Sponsorship  source | No conflict of interest to declare. The study w as funded in part by the Department of Nutrition and Dietetics Graduate Program | |  |
| Country | Greece |  |  |
| Methods | | | |
| Design | Randomized controlled trial |  |  |
| Group | Parallel group |  |  |
| IRB | in Athens, Greece. Approval to conduct the study w as obtained from both the Ethics Committee of Harokopio University and the Ethics Committee of “Agia  Sophia” Children’s Hospital, and all parents provided their w ritten consent. | | |
| Outcomes other  than BMI | Other obesity |  |  |
| Population | | | |
| Inclusion criteria | Overw eight or obese children, aged betw een 7 and 12 years |  |  |
| Exclusion criteria | Any chronic physical or men-tal illness |  |  |
| Group  differences | Randomized |  |  |
| Special  Populations | None |  |  |
|  | Child alone | Child and parent | Ove rall |
| N | 19 | 23 | 42 |
| Sex | NR | NR | NR |
| Age (mean and  range) | 9.1 | 9.4 | NR |
| Race | NR | NR | NR |
| BMI-based percent  overw eight | 42.5 | 37.5 | NR |
| Interventions | |  |  |
|  | Child alone | Child and parent |  |
| Intervention as defined by author | Multidisciplinary program involving many CBT principles and some novelties as regards the dietetic practice, such as supervision of the dieticians by the psychiatrists and implementation w ith booster sessions after the intensive program. In the Child-alone group, sessions w ere conducted w ithout any parental involvement and parental help was not required unless the child requested it. | Multidisciplinary program involving many CBT principles and some novelties as regards the dietetic practice, such as supervision of the dieticians by the psychiatrists and implementation w ith booster sessions after the intensive program . In the Child-and-parent group, parents w ere asked to act as helpers: apart from attending tw o individual sessions w ith the dietician, they also participated in the last 10 minutes of each session, w hile their cooperation w as actively requested in sup-porting their  child to implement the goals set. |  |
| Intervention type | Lifestyle | Lifestyle |  |
| Intervention  Length | 12 w eeks plus 6 monthly booster sessions | 12 w eeks plus 6 monthly booster sessions |  |
| Intensity as  described by authors | The intensive program consisted of 12 w eekly sessions, each lasting 1 hour and  conducted individually. Follow ed by booster sessions after the intensive program (6 monthly sessions from 3 to 9 months and one final session at 5 months. | The intensive program consisted of 12 w eekly sessions,  each lasting 1 hour and conducted individually. Follow ed by booster sessions after the intensive program (6 monthly |  |

|  |  | sessions from 3 to 9 months and one final session at 5  months. |
| --- | --- | --- |
| Assigned  intensity | 5-25 hours | 5-25 hours |
| Provider types | Dietitian, mental health | Dietitian, mental health |
| Clinic setting | multidisciplinary WMP | multidisciplinary WMP |
| Components | Nutrition counseling, activity counseling, mental health | Nutrition counseling, activity counseling, mental health |

| Outcomes |  |  |  |  |  |  |
| --- | --- | --- | --- | --- | --- | --- |
| BMI-based Percent Overw eight | | | | | | |
|  | 3 months |  | 18 months | |  |  |
|  | N | Mean | p (betw een groups) | N | Mean | p (betw een groups) |
| Child alone | 18 | NR | NR | 16 | NR | 0.311 |
| Child and parent | 18 | NR |  | 16 | NR |  |

**Berkowitz, Ri; Rukstalis, Mr; Bishop-Gilyard, Ct; Moore, Rh; Gehrman, Ca; Xanthopoulos, Ms; Cochran, Wj; Louden, D; Wadden, Ta Treatment of adolescent obesity comparing self-guided and group lifestyle modification programs: a potential model for primary care**

| Study  Identification |  |  |  |
| --- | --- | --- | --- |
| Sponsorship  source | This study w as supported by grants SAP4100033130 (RIB)from the Pennsylvania Department of Health and K24-DK065018 (TAW) from the National  Institutes of Health and grant UL1RR024134 from the National Center forResearch Resources. | | |
| Country | USA |  |  |
| Methods | | | |
| Design | Randomized controlled trial |  |  |
| Group | Parallel group |  |  |
| IRB | This study w as approved by the institutional review boards at the tw o sites (ClinicalTrials.Gov Identifier: NCT0107321 5). | |  |
| Outcomes other  than BMI | Other obesity |  |  |
| Population | | | |
| Inclusion criteria | Participants w ere 12–16-year-old males and postmena-rcheal females w ith a BMI28 kg/m2. | |  |
| Exclusion criteria | Candidates underw ent a medical screening to rule out contraindications to treatment. These included cardio-vascular disease (including arrhythmias), type 1 or 2 dia-betes mellitus, psychiatric disorders (such as major depressive disorder and behavioral disorders), pregnancy, use of a w eight-loss medication or  a w eight loss of 5kg in the prior 6 months, use of medications promoting w eight gain (e.g., oral steroids), or cigarette smoking | | |
| Group  differences | Randomized |  |  |
| Special populations | Rural |  |  |
|  | Group LMP (Lifestyle Modification Program) | Self-guided LMP (Lifestyle Modification Program) | Overall |
| N | 81 | 88 | 169 |
| Sex | NR | NR | 76.9% female |
| Age (mean and  range) | NR | NR | 14.6 |
| Race | NR | NR | 46.7& w hite, 46.7% African-American, 0.6% Native  American, 1.2%  unknow n, 4.7% multi race, 2.4% Hispanic |
| BMI-SDS | NR | NR | 2.3 |
| Interventions | |  |  |
|  | Group LMP (Lifestyle Modification Program) | Self-guided LMP (Lifestyle Modification Program) |  |
| Intervention as defined by authors | Adolescents in both treatment conditions received the same 12-month comprehensive family-based LMP curricu-lum. The LMP w as delivered  follow ing detailed treatment manuals provided to adolescents and parents (or guardians) (Wadden & Berkow itz, 2001), w hich w ere w rit-ten at a fifth-grade reading level. All adolescents w ere asked to consume a nutritionally balanced diet of 1300– 1500 kcal/day, according to the United States Department of Agriculture (USDA) MyPyramid guidelines (USDA, 2009) to increase physical activity to 60 min or 10,000 steps daily, and to decrease sedentary behaviors to few er than 2 hr daily . Parents and teens in the Group LMP w ere provided 17 additional in-clinic group visits at w hich they review ed their progress in completing the lessons from the treatment manual, had interactive discussions around eating and  physical activity topics, and received peer support. | Adolescents in both treatment conditions received the same 12-month comprehensive family-based LMP curricu-lum. The LMP w as delivered follow ing detailed treatment manuals provided to adolescents  and parents (or guardians) (Wadden & Berkow itz, 2001), w hich w ere w rit-ten at a fifth-grade reading level. All adolescents w ere asked to consume a nutritionally balanced diet of 1300–1500 kcal/day, according to the United States Department  of Agriculture (USDA) MyPyramid guidelines (USDA, 2009) to increase physical activity to 60 min or 10,000 steps daily, and to decrease  sedentary behaviors to few er than 2 hr daily . |  |

| Intervention  type | Lifestyle | Lifestyle |
| --- | --- | --- |
| Intervention  Length | 12 months | 12 months |
| Intensity as  described by authors | Both Group and Self -Guided LMP participants had six scheduled clinic  visits (45 min each). Group LMP w ere provided 17 additional in-clinic group visits . | Both Group and Self -Guided LMP participants had six scheduled clinic visits (45 min each). |
| Assigned  intensity | 5-25 hours | 5-25 hours |
| Provider type | Primary care, Nutrition, Mental Health | Primary care, Nutrition, Mental Health |
| Clinic setting | Primary care | Primary care |
| Components | Nutrition counseling, activity counseling, mental health | Nutrition counseling, activity counseling, mental health |

| Outcomes |  |  |  |  |  |  |  |
| --- | --- | --- | --- | --- | --- | --- | --- |
| BMI |  |  |  |  |  |  |  |
| 6 months |  |  | 12 months | |  |  |  |
| N | Mean | SD | p (betw een groups) | N | Mean | SD | p (betw een groups) |
| Group LMP (Lifestyle Modification Program) | -0.94 | 0.24 | NS | 61 | -0.45 | 0.35 | 0.88 |
| Self-guided LMP (Lifestyle Modification Program) | -0.77 | 0.25 | - | 53 | -0.38 | 0.36 | - |
| BMI SDS | | | | | | | |
| 6 months |  |  | 12 months | |  |  |  |
| N | Mean | SD | p (betw een groups) | N | Mean | SD | p (betw een groups) |
| Group LMP (Lifestyle Modification Program) | -0.11 | 0.02 |  | 61 | -0.12 | 0.03 | 0.91 |
| Self-guided LMP (Lifestyle Modification Program) | -0.09 | 0.02 | - | 53 | -0.12 | 0.03 | - |

**Berkowitz, Ri; Wadden, Ta; Gehrman, Ca; Bishop-Gilyard, Ct; Moore, Rh; Womble, Lg; Cronquist, Jl; Trumpikas, Nl; Levitt, Katz Le; Xanthopoulos, Ms Meal replacements in the treatment of adolescent obesity: a randomized controlled trial**

| Study  Identification |  |  |  |  |
| --- | --- | --- | --- | --- |
| Sponsorship  source | This study w as supported by grants DK054713 and K24-DK065018 from the National Institutes of Health and grant UL1RR024134 from the National Center for  Research Resources. Unilever provided SlimFast for the study | | | |
| Country | USA |  |  |  |
| Methods | | | | |
| Design | Randomized controlled trial |  |  |  |
| Group | Parallel group |  |  |  |
| IRB | This study w as approved by the institutional review boards of the Children’s Hospital of Philadelphia and of the University of Pennsylvania (ClinicalTrials.Gov  Identifier: NCT0021217). | | | |
| Outcomes other than  BMI | Other obesity, blood pressure, lipids, glucose metabolism, mental health | |  |  |
| Population | | | | |
| Inclusion  criteria | 13–17-year-old males and postmenarcheal females w ho had a BMI of 28–50kg/m2 | |  |  |
| Exclusion  criteria | Cardiovascular disease (including arrhythmias); types 1 or 2 diabetes mellitus; major psychiatric disorders; pregnancy; use of a w eight-loss medication  or a w eight loss of 5kg or more in the prior 6 months; use of medications promoting w eight gain (e.g., oral ster-oids); or cigarette smoking. | | | |
| Group  differences | Randomized |  |  |  |
| Special  populations | None |  |  |  |
|  | Conventional Diet | Meal Replacement | Meal Replacement follow ed by conventional diet | Overall |
| N | 42 | 71 | NR | 113 |
| Sex | 79% female | 82% female | NR | 81% female |
| Age (mean  and range) | 15.2 | 14.9 | NR | 15.0 (13-17) |
| Race | 26% w hite, 64% African American, 10% other | 26 w hite, 61% African American, 13% other | NR | 26% w hite,  62% African American, 12% other |
| BMI SDS | 2.4 | 2.3 | NR | 2.3 |
| Interventions | |  |  |  |
|  | Conventional Diet | Meal Replacement | Meal Replacement follow ed by  conventional diet |  |
| Intervention as defined by author | Adolescents in all treatment conditions received the same comprehensive family based LMP. Participants w ho consumed the CD w ere instructed to consume a diet consistent w ith recommendations of the US Dietary guidelines (12). Participants w ere encouraged to consume ≤30% of kcal/day from fat, ~15% from protein, and the remainder from carbohydrates. | Adolescents in all treatment conditions received the same comprehensive family based LMP. The daily MR plan consisted of three SlimFast shakes that w ere provided free of charge (Unilever, Englew ood, NJ), combined w ith one prepackaged meal of the adolescents’ choice,  tw o servings of fruit, and three servings of  vegetables (all purchased by participants). Prepackaged meals w ere selected from a list of frozen food entrées, all of w hich provided | Meal replacement for first 4 months, follow ed by transition to conventional diet (as described). |  |

|  |  | about 225–300 kcal per serving, w ith 20–25g  of protein. |  |
| --- | --- | --- | --- |
| Intervention  type | Lifestyle | Specif ic Diet | Dieting + Lifestyle |
| Intervention  Length | 12 months | 12 months | 12 months |
| Intensity as described by authors | Phase 1: w eekly group LMP meetings (assume 90 min?). After 2 w eeks of orientation, for the next 14 w eeks adolescents w ere prescribed a 1300–1500kcal/day CD diet. Phase 2 = From months 5–7, all participants received tw ice monthly group LMP meetings, follow ed by monthly group meetings from months 8 to 12. | Phase 1: w eekly group LMP meetings (assume 90 min?) After 2 w eeks of orientation, for the next 14 w eeks adolescents w ere prescribed a 1300– 1500kcal/day isocaloric diet. Phase 2 = From months 5–7, all participants received tw ice monthly group LMP meetings, follow ed by monthly group meetings from months 8 to 12. | Adolescents and their parents attended w eekly group LMP meetings. After 2 w eeks of orientation and learning how to self -monitor dietary intake, for the next 14 w eeks ado- lescents w ere prescribed a 1,300– 1,500kcal/day CD, comprised of con- ventional foods, or an isocaloric MR  diet. |
| Assigned  intensity | 5-25 hours | 5-25 hours | 5-25 hours |
| Provider types | Primary care, nutrition provider, mental health | Primary care, nutrition provider, mental health | Primary care, nutrition provider, mental  health |
| Clinic setting | Multidisciplinary w eight management program | Multidisciplinary w eight management program | Multidisciplinary w eight management  program |
| Components | Nutrition counseling, activity counseling,  CBT/therapy | Nutrition counseling, activity counseling,  CBT/therapy | Nutrition counseling, activity  counseling, CBT/therapy |

| Outcomes |  |  |  |  |  |  |  |  |
| --- | --- | --- | --- | --- | --- | --- | --- | --- |
| BMI |  |  |  |  |  |  |  |  |
|  | 4 months |  |  | 12 months | |  |  |  |
|  | N | Mean | SD | p (betw een groups) | N | Mean | SD | p (betw een groups) |
| Conventional Diet | 37 | -1.3 | 0.3 | 0.007 | 26 | -0.96 | 0.5 | NS |
| Meal Replacement | 65 | -2.3 | 0.2 |  | 26 | -1.3 | 0.5 |  |
| Meal Replacement follow ed by conventional diet |  |  |  |  | 23 | -1.3 | 0.5 | - |
| BMI SDS | | | | | | | | |
|  | 4 months |  |  | 12 months | |  |  |  |
|  | N | Mean | SD | p (betw een groups) | N | Mean | SD | p (betw een groups) |
| Conventional Diet | 37 | -0.1 | 0.02 | 0.07 | 26 | -0.09 | 0.04 | NS |
| Meal Replacement | 65 | -0.2 | 0.02 | - | 26 | -0.1 | 0.04 | - |
| Meal Replacement follow ed by conventional diet |  |  |  |  | 23 | -0.11 | 0.04 | - |

**Bocca, G; Corpeleijn, E; Heuvel, Er; Stolk, Rp; Sauer, Pj**

**Three-year follow-up of 3-year-old to 5-year-old children after participation in a multidisciplinary or a usual-care obesity treatment program**

| Study  Identification |  |  |  |
| --- | --- | --- | --- |
| Sponsorship  source | The study w as sponsored w ith an unrestricted grant by Hutchison Whampoa Limited, 22/F Hutchison House, 10 Harcourt Road, Hong Kong. | |  |
| Country | The Netherlands |  |  |
| Methods | | | |
| Design | Randomized controlled trial |  |  |
| Group | Parallel group |  |  |
| IRB | The study w as approved by theMedical Ethics Committee of the University Medical CenterGroningen |  |  |
| Outcomes other  than BMI | other obesity, behaviors |  |  |
| Population | | | |
| Inclusion criteria | Children aged 3-5 years w ere ref erredto the outpatient clinic if they had a BMI-z>1.1. |  |  |
| Exclusion criteria | Medical causes for obesity, eating disorders, mental retardation and behavioral problems |  |  |
| Group  differences | Randomized |  |  |
| Special  populations | Preschoolers |  |  |
|  | Multidisciplinary Intervention | Usual Care | Overall |
| N | 40 | 35 | 75 |
| Sex | 70.0% female | 74.3% female | 28%  male |
| Age (mean and range) | 4.6 | 4.7 | NR |
| Race | NR | NR | NR |
| BMI SDS | 2.7 | 2.7 | NR |
| Interventions | |  |  |
| Intervention as | Multidisciplinary Intervention  The multidisciplinary lifestyle intervention program included dietary advice for children and parents (6 sessions of 30 min each),physical activity sessions for children (12 sessions of 60 min each)and psychological counselling for parents only (6 sessions of 120 min each). Dietary advice | Usual Care  In the usual-care group, children and parents w ere follow ed up by a pediatrician (3 sessions |  |
| defined by  authors  Intervention Type | w as given by a dietician and aimed at improving eating behavior by using personal goals. Physical activity sessions under guidance by a physiotherapist mimicked elementary school exercise.  Lifestyle | of 30-60 min each)w ho advised on healthy eating and an active lifestyle.  Lifestyle |  |
| Intervention  Length | 16 w eeks | 16 w eeks |  |
| Intensity as described by authors | The multidisciplinary lifestyle intervention program included dietary advice for children and parents (6 sessions of 30 min each), physical activity sessions for children (12 sessions of 60 min each) and psychological counselling for parents only (6 sessions of 120 min each). | In the usual-care group, children and parents w ere follow ed up by a pediatrician (3 sessions of 30-60 min each) w ho advised on healthy  eating and an active lifestyle. |  |
| Assigned Intensity | 26-51 hours | <5 hours |  |
| Provider types | Primary care, nutrition provider, mental health, exercise | Primary care |  |
| Clinic setting | Multidisciplinary w eight management program | Multidisciplinary w eight management clinic |  |
| Components | Nutrition counseling, activity counseling, activity training, CBT/therapy, other (parent training) | Nutrition counseling, activity counseling |  |

| Outcomes |  |  |  |  |  |
| --- | --- | --- | --- | --- | --- |
| BMI SDS |  |  |  |  |  |
| 36 months | | | | | |
|  | N | Mean | CI (low er bound) | CI (upper bound) | p (across groups) |
| Multidisciplinary Intervention | 17 | 0.394 | -0.002 | 0.79 | NS |
| Usual Care | 12 |  |  |  |  |

**Bocca, G; Corpeleijn, E; Stolk, Rp; Sauer, Pj**

**Results of a multidisciplinary treatment program in 3-year-old to 5-year-old overweight or obese children: a randomized controlled clinical trial**

| Study  Identification |  |  |  |
| --- | --- | --- | --- |
| Sponsorship  source | The study w as sponsored by an un-restricted grant from Hutchison Whampoa Limited, HongKong. | |  |
| Country | The Netherlands |  |  |
| Methods | | | |
| Design | Randomized controlled trial |  |  |
| Group | Parallel group |  |  |
| IRB | The study w as approved by the medical ethics committee of the University Medical Center Groningen. Written inf ormed consent from the parents or legal  caretakers w as obtained. | | |
| Outcomes other  than BMI | Other obesity, behaviors |  |  |
| Population | | | |
| Inclusion criteria | Aged 3 to 5 years; Overw eight or obese children, as defined by the International Obesity Task Force | |  |
| Exclusion  criteria | Children w ith mental retardation, severe behavioral problems, or other criteria interfering w ith participation w ere excluded. Also, children w ho w ere over-w eight  or obese ow ing to know n medical conditions or eating disorders, according to the Dutch Eating Behavior Questionnaire, w ere excluded from the study. | | |
| Group  differences | Randomized |  |  |
| Special populations | Preschoolers |  |  |
|  | Multidisciplinary Intervention | Usual Care | Overall |
| N | 40 | 35 | 75 |
| Sex | 30% male | 25.7% male | NR |
| Age (mean and  range) | 4.6 | 4.6 | 4.7 |
| Race | NR | NR | NR |
| BMI SDS | 2.7 | 2.7 | 2.7 |
| Interventions | |  |  |
|  | Multidisciplinary Intervention | Usual Care |  |
| Intervention as described by authors | Children and parents in the multidisciplinary intervention pro-gram received dietary advice, physical activity sessions and, for parents only, psychologic counseling. Dietary advice consisted of 6 sessions of 30 minutes each, guided by a dietician. The physical activity sessions consisted of 12 group sessions of 60 minutes each and w ere supervised by a physio-therapist. Behavioral therapy for parents comprised 6 group sessions of 120 minutes  each that w ere guided by a psychologist. | Children and parents in the usual-care group w ere follow ed up by a pediatrician, also during a period of 16 w eeks. Children and parents in the usual-care group w ere follow ed up by a pediatrician, also dur- ing a period of 16 w eeks. |  |
| Intervention type | Lifestyle | Lifestyle |  |
| Intervention  Length | 16 w eeks | 16 w eeks |  |
| Intensity as described by authors | In total, the multidisciplinaryintervention program consisted of 25 sessions, together ap- proximately 30 hours in 16 w eeks. | Children and parents in the usual-care group w ere  follow ed up by a pediatrician, also during a period of 16 w eeks. In this period, they w ere seen 3 times for 30 to 60 minutes each time. |  |
| Assigned intensity  Provider types | 26-51 hours  primary care, nutrition provider, mental health, exercise | <5 hours Primary care |  |
| Clinic setting | Multidisciplinary w eight management program | Multidisciplinary w eight management program |  |

Components nutrition counseling, activity counseling, activity training, mental health Nutrition counseling, activity counseling

| Outcomes |  |  |  |  |  |  |  |  |
| --- | --- | --- | --- | --- | --- | --- | --- | --- |
| BMI |  |  |  |  |  |  |  |  |
| 16 w eeks | |  |  | 12 months | |  |  |  |
|  | N | Mean | SD | p (betw een groups) | N | Mean | SD | p (betw een groups) |
| Multidisciplinary Intervention | 33 | -1.2 | 1 | <0.05 | 32 | -1 | 1.4 | 0.03 |
| Usual Care | 29 | -0.6 | 1.1 | - | 25 | 0 | 1.6 | - |
| BMI SDS | | | | | | | | |
| 16 w eeks | |  |  | 12 months | |  |  |  |
|  | N | Mean | SD | p (betw een groups) | N | Mean | SD | p (betw een groups) |
| Multidisciplinary Intervention | 33 | -0.5 | 0.4 | <0.05 | 32 | -0.6 | 0.5 | 0.02 |
| Usual Care | 29 | -0.3 | 0.4 | - | 25 | -0.3 | 0.5 | - |

**Bocca, G; Kuitert, Mw; Sauer, Pj; Stolk, Rp; Flapper, Bc; Corpeleijn, E**

**A multidisciplinary intervention programme has positive effects on quality of life in overweight and obese preschool children**

| Study  Identification |  |  |  |
| --- | --- | --- | --- |
| Sponsorship  source | The study w as sponsored by an unrestricted grant from Hutchison Whampoa Limited, Hong Kong. |  |  |
| Country | The Netherlands |  |  |
| Methods | | | |
| Design | Randomized controlled trial |  |  |
| Group | Parallel group |  |  |
| IRB | The study w as approved by the Medical Ethics Committee of the University Medical Center Groningen, and inf ormed consent w as obtained from the  children’s parents or legal caretakers. The procedures follow ed w ere in accordance w ith the 1975 Declaration of Helsinki, as revised in 1983. | |  |
| Outcomes other  than BMI | Other obesity, psychosocial |  |  |
| Population | | | |
| Inclusion criteria | obese children from 3- to 5-years-old. We included childrenin the study if they w ere overw eight or obese according tothe International Obesity Task Force  definitions, w ith aBMIz-score of more than 1.1 for overw eight children andmore than 2.3 for obese children. | | |
| Exclusion criteria | Children w ith obesity caused by medical problems, and w ith mental retardation or behavioural problems, w ere excluded from the study | |  |
| Group  differences | Randomized |  |  |
| Special populations | Young children (age 3-5) |  |  |
|  | Multidisciplinary intervention | Standard Care | Overall |
| N | 40 | 35 | 75 |
| Sex | 30% male | 25.7% male | NR |
| Age (mean and  range) | 4.6 | 4.7 | 4.7 |
| Race | NR | NR | NR |
| BMI SDS | 2.7 | 2.7 | NR |
| Interventions | |  |  |
|  | Multidisciplinary intervention | Standard Care |  |
| Intervention as defined by author | The children and parents in the intervention group received dietary advice from a dietician during 6, 30-min sessions. In addition, the children took part in 12, 60-min physical activity group sessions, conducted by a physiotherapist, w hich mimicked elementary school exercises and aimed to improve the child’s w ell-being.Parents in the intervention group also received six psychological counselling sessions, each lasting 2 h, w hich encouraged them to provide a healthy role model  and to change their family’s attitudes tow ards healthy eating and physical activity | Children and parents in the standard care group received advice on a healthy lifestyle from a resident in paediatrics, during three sessions lasting betw een 30 min and 1 h. |  |
| Intervention type | Lifestyle | Lifestyle |  |
| Intervention  Length | 16 w eeks | 16 w eeks |  |
| Intensity as  described by authors | 6 30-min dietary sessions, 12 60-min PA sessions, six 2-hour counseling | 3 30 min to 1 hr sessions |  |
| Assigned intensity | 26-51 hours | <5 hours |  |
| Provider types | Primary care, nutrition provider, mental health, exercise | Primary care |  |
| Clinic setting | Primary care | Primary care |  |
| Components | Nutrition counseling, activity counseling, activity training, motivational interview ing, mental health | Nutrition counseling, Activity counseling |  |

| Outcomes |  |  |  |  |  |  |  |  |
| --- | --- | --- | --- | --- | --- | --- | --- | --- |
| BMI SDS |  |  |  |  |  |  |  |  |
| 16 w eeks | |  |  | 12 months | |  |  |  |
|  | N | Mean | SD | p (betw een groups) | N | Mean | SD | p (betw een groups) |
| Multidisciplinary intervention | 31 | -0.5 | 0.4 | NR | 20 | -0.6 | 0.5 | NR |
| Standard Care | 28 | -0.3 | 0.4 | - | 20 | -0.3 | 0.5 | - |

**Bohlin, A; Hagman, E; Klaesson, S; Danielsson, P**

**Childhood obesity treatment: telephone coaching is as good as usual care in maintaining weight loss - a randomized controlled trial**

| Study  Identification |  |  |  |
| --- | --- | --- | --- |
| Sponsorship  source | This study w as funded by the Stockholm County Council. |  |  |
| Country | Sw eden |  |  |
| Methods | | | |
| Design | Randomized controlled trial |  |  |
| Group | Parallel group |  |  |
| IRB | The study w as approved by the Stockholm Regional Ethical Committee (2006/1291-31/4) and is registered: Clinical-Trials.gov: NCT 02794090. | | |
| Outcomes  other than BMI | None |  |  |
| Population | | | |
| Inclusion  criteria | All families w ith chil-dren aged 5–14 years w ere invited to participate in the ran-domized study of individual treatment after the parents had attended at least  four out of seven meetings in the ini-tial group treatment. | | |
| Exclusion  criteria | Exclusion criteria w ere obesity-related syndromes (Laurence Moon Bardet Biedl and Prader Willi)and non-Sw edish-speaking parents | | |
| Group  differences | Randomized |  |  |
| Special populations | None |  |  |
|  | Telephone Coaching | Usual Care | Overall |
| N | 18 | 19 | 37 |
| Sex | 47.4% female | 22.2% female | NR |
| Age (mean and  range) | 9.8 | 9.3 | NR |
| Race | 26.3% non-Scandinavian parent | 38.9% non-Scandinavian parent | Turkey 7, Iraq 4, Syria 3,  Phillippines 1, Morocco 1, Spain  1 |
| BMI SDS | 2.97 | 2.91 | NR |
| Interventions | |  |  |
|  | Telephone Coaching | Usual Care |  |
| Intervention as described by authors | Weight maintenance. In the TC group, the goal w as to stay in contact everymonth, excluding the summer vacation. During each TCsession, the treating nurse spoke w ith one of the parents,and the timing of the next TC session w as agreed uponat the end of each conversation. amilies in the TC group used astructured questionnaire w ithfive categories as a guide dur-ing TC contact w ith the nurse. The questionnaire raisedissues such as current w eight, w hat w orks w ell and lessw ell regarding eating habits, physical activity, sedentaryactivities, the process of change and potential conflictsaround this. The inf ormation from the questionnaire  w asused by the nurse from a problem-solving perspective. After 18 months, children had a study-endfinal visit w here the w eight and  height w as checked. | Weight maintenance. The number of visits in the UC group follow ed the UC (15)model, and the sessions w ere led by the treating nurse. |  |
| Intervention  type | Lifestyle | Lifestyle |  |

| Intervention  Length | 18 months | 18 months |
| --- | --- | --- |
| Intensity as described by authors | Monthly, <15 minutes | 0-min programme for parents once a w eek for 7  w eeks, In parallel w ith the parental programme, the children partici-pated in an educational and physical activity group. Afterthis initial group treatment programme, treatment w asindividualized for each patient and involved visits to amedical doctor (normally 1–2 times/year), a nurse (1–8 times/year) and, if necessary, a dietician and physiotherapist. As treatment w as individualized, the frequency of visits  varied by patient. Follow up visits 45 min duration |
| Assigned  intensity | <5 hours | 5-25 hrs |
| Provider types | Group leader, unspecified, nurse | Group leader, unspecified. Primary care, nutrition  provider, physiotherapist |
| Clinic setting | Multidisciplinary w eight management | Multidisciplinary w eight management |
| Components | Nutrition counseling, activity counseling | Usual care, activity training, nutrition provider,  exercise |

| Outcomes |  |  |  |  |  |  |  |  |  |  |
| --- | --- | --- | --- | --- | --- | --- | --- | --- | --- | --- |
| BMI-SDS |  |  |  |  |  |  |  |  |  |  |
| 18 Months | |  |  |  | 36 Months | |  |  |  |  |
|  | N | Mean | SD | p (w ithin group) | p (betw een groups) | N | Mean | SD | p (w ithin group) | p (betw een groups) |
| Telephone Coaching | 15 | -0.16 | 0.39 | 0.1 | >0.8 | 15 | -0.42 |  |  | 0.6 |
| Usual Care | 18 | -0.12 | 0.43 | 0.4 | - | 19 | -0.52 |  |  | - |

**Boutelle, Kn; Norman, Gj; Rock, Cl; Rhee, Ke; Crow, Sj Guided self-help for the treatment of pediatric obesity**

| Study  Identification |  |  |  |
| --- | --- | --- | --- |
| Sponsorship  source | Supported by the National Institutes of Health (NIH) DK080266. Dr Crow e has research grants from Shire, Alkermes, and Novartis; the other authors indicated  they have nofinancial relationshipsrelevant to this article to disclose. | | |
| Country | USA |  |  |
| Methods | | | |
| Design | Randomized controlled trial |  |  |
| Group | Parallel group |  |  |
| IRB | The study w as approved by the University of California, San Diego, Institutional Review Board |  |  |
| Outcomes other  than BMI | Behaviors, other (parent BMI) |  |  |
| Population | | | |
| Inclusion  criteria | Children aged 8 to 12 years w ho w ere overw eight or obese (BMI percentile:85th to 98th) and their parents |  |  |
| Exclusion  criteria | Families w ere excluded if either the child or parent w as currently involved in any other psychological or w eight-loss treatment, w as using medications that  affected appetite or w eight, had a psy-chiatric condition, or did not speak English | | |
| Group  differences | Randomized |  |  |
| Special Populations | None |  |  |
|  | Immediate Guided Self -Help | Delayed Guided Self Help | Overall |
| N | 25 | 25 | 50 |
| Sex | 60% female | 64% female | NR |
| Age (mean and  range) | 10.3 | 10.5 | NR |
| Race | 4% Asian, 8% African American, 4% NH/PI, 12% Hispanic, 72% w hite | 12% Asian 4% African American,  0% NH/PI, 16% Hispanic, 68% w hite | NR |
| BMI SDS | 1.71 | 1.71 | NR |
| Interventions | |  |  |
|  | Immediate Guided Self -Help | Delayed Guided Self Help |  |
| Intervention as defined by authors | Families received a parentmanual, a child manual, and an activi-ties manual. The activities manualw as designed to provide activities andgames that parents and childrencould do together to enhance programlearning at home. Families w ere told to readthe assigned chapter in the parent andchild manuals betw een visits, apply theskills, and complete any activities fromthe activities manual that w ere of in-terest to  their family. Meetings w ith the interventionistsw ereamaximumof 20minutes inlength,w iththe exception of session 2, w hich w asdesigned to be 1 hour to allow fortime to discuss the dietary recom-mendations. Visits w ere  focused onmonitoring w eight of parent and child,reflectingonchildandparentbehaviorsthat led to any w eight changes (to im-prove self-regulation), answ ering anyquestions regarding program material,and problem solving any barriers toimplementing program recommenda-tions. Parents and children w ere givenself -monitoring  booklets and w ere toldto w rite dow n their food intake andphysical activity daily in as much detailas possible. | The delayed treatment group did nothave any contact w ith the project teamduring the 5-month delay, and they re-ceived the GSH-PO intervention startingat T2. |  |
| Intervention type | Lifestyle | Lifestyle |  |
| Intervention  length | 5 months | 5 months |  |

| Intensity as described by authors | 11 visits, 20 minutes each; 1 visit 1 hour | The delayed treatment group did not have any contact w ith the project team during the 5-month delay, and they received the GSH-  PO intervention starting at T2. |
| --- | --- | --- |
| Assigned  intensity | 5-25 hours | NA |
| Provider types | Research, "graduate students in clinical psychology" | NA |
| Clinic setting | Primary care | NA |
| Components | Nutrition counseling, activity counseling, mental health | NA |

| Outcomes |  |  |  |  |  |  |  |  |  |  |  |  |
| --- | --- | --- | --- | --- | --- | --- | --- | --- | --- | --- | --- | --- |
| Child BMI |  |  |  |  |  |  |  |  |  |  |  |  |
| T1 (Baseline) | |  | T2 (5 months) | |  | T3 (11 months) | |  | T4 (17 months) | |  |  |
|  | mean | SD | N | mean | SD | N | mean | SD | N | mean | SD | N |
| Immediate Guided Self -Help | 24.07 | 1.92 | 25 | 23.34 | 2.11 | 22 | 24.03 | 2.64 | 22 |  |  |  |
| Delayed Guided Self Help | 24.4 | 2.55 | 25 | 25.17 | 2.79 | 25 | 24.48 | 3.01 | 22 | 25.01 | 3.23 | 22 |
| Child BMI SDS | | | | | | | | | | | | |
| T1 (Baseline) | |  | T2 (5 months) | |  | T3 (11 months) | |  | T4 (17 months) | |  |  |
|  | mean | SD | N | mean | SD | N | mean | SD | N | mean | SD | N |
| Immediate Guided Self -Help | 1.71 | 0.25 | 25 | 1.49 | 0.32 | 22 | 1.5 | 0.37 | 22 |  |  |  |
| Delayed Guided Self Help | 1.71 | 0.28 | 25 | 1.74 | 0.3 | 25 | 1.56 | 0.34 | 22 | 1.55 | 0.39 | 22 |

**Broccoli, S; Davoli, Am; Bonvicini, L; Fabbri, A; Ferrari, E; Montagna, G; Panza, C; Pinotti, M; Storani, S; Tamelli, M; Candela, S; Bellocchio, E; Giorgi, Rossi P Motivational Interviewing to Treat Overweight Children: 24-Month Follow-Up of a Randomized Controlled Trial**

| Study  Identification |  |  |  |
| --- | --- | --- | --- |
| Sponsorship  source | No external funding |  |  |
| Country | Italy |  |  |
| Methods | | | |
| Design | Randomized controlled trial |  |  |
| Group | Parallel group |  |  |
| IRB | NR |  |  |
| Outcomes other  than BMI | Behaviors |  |  |
| Population | | | |
| Inclusion criteria | Eligible participants w ere all overw eight children (BMI percentile ≥85th and <95th)20 aged betw een 4 and 7 years, resident in the province of Reggio Emilia,  and under the care of said pediatrician for ≥12 months. | | |
| Exclusion criteria | Exclusion criteria w ere metabolic pathologic conditions and all pathologic conditions related to obesity and being overw eight. Moreover, those families w ho did not consider their children being overw eight to be an issue and w ere not interested in the negative consequences or advice on how to lose w eight (families in  the “precontemplation stage”) w ere also excluded. | | |
| Group  differences | Randomized |  |  |
| Special  Populations | None |  |  |
|  | Motivational Interview ing (MI) | control | Overall |
| Sex | Male: 40.1%; Female: 59.9% | Male: 36.8%; Female:63.2% | NR |
| Age in years (mean and  range) | 6.7 | 6.5 | NR |
| Race | NR | NR | NR |
| BMI-SDS/ BMI-z-  score | 1.35 | 1.35 | NR |
| BMI | 18.27 | 18.21 | NR |
| N | 187 | 185 | 372 |
| Interventions | |  |  |
|  | Motivational Interview ing (MI) | control |  |
| Intervention as defined by author | The intervention consisted of 5 Motivational interview ing (MIs) delivered at 1, 4, 7, and 12 months after the baseline visit. First session: To negotiate 2 objectives: changes in diet and PA habits, respectively; second session To assess the degree of achievement of the negotiated objectives and to reinf orce or to redefine them; third session: To reinf orce or to redefine negotiated objectives and to redefine negotiated objectives; Fourth session: To reinf orce or to redefine negotiated objectives and To redefine negotiated objectives; Fifth  session: BMI, PA, and dietary habits assessment; final strength of objectives | They received a booklet w ith the main inf ormation on obesity prevention (eg, opportunistic healthy diet recommendations if the pediatrician w as seeing the child for other reasons). |  |
| Intervention type | Lifestyle | Usual Care |  |
| Target person | - | - |  |
| Intervention  length | 12 months | 12 months |  |
| Intensity as  described by authors | Session 1: 45/60 min; session 2:45/60 min; session 3: 30 min and 45/60 min; session 4: 30 min and 45/60 min; session 5: 45 min | 45min |  |

| Assigned  intensity hours | <5 hours | < 5 hours |
| --- | --- | --- |
| Provider type | Pediatrician | Primary care |
| Clinic setting | Primary care | Primary care |
| Components | Motivational Interview ing | Usual care |

| Outcomes |  |  |  |  |  |  |
| --- | --- | --- | --- | --- | --- | --- |
| BMI |  |  |  |  |  |  |
|  | 12 months |  |  | 24 months |  |  |
| Change in BMI | | 95% CI Low er Bounds | 95% CI Upper Bounds | Change in BMI | 95% CI Low er Bounds | 95% CI Upper Bounds |
| Motivational Interview ing (MI) | 0.46 | 0.27 | 0.65 | 1.52 | 1.29 | 1.75 |
| control | 0.78 | 0.61 | 0.96 | 1.56 | 1.33 | 1.79 |
| BMI z-score | | | | | | |
|  | 12 months |  |  | 24 months |  |  |
| Change in BMI | | 95% CI Low er Bounds | 95% CI Upper Bounds | Change in BMI | 95% CI Low er Bounds | 95% CI Upper Bounds |
| Motivational Interview ing (MI) | -0.12 | -0.17 | -0.06 | -0.05 | -0.12 | 0.01 |
| control | -0.01 | -0.06 | 0.04 | -0.03 | -0.09 | 0.02 |

**Butte, Nf; Hoelscher, Dm; Barlow, Se; Pont, S; Durand, C; Vandewater, Ea; Liu, Y; Adolph, Al; PÃ©rez, A; Wilson, Ta; Gonzalez, A; Puyau, Mr; Sharma, Sv; Byrd-Williams, C; Oluyomi, A; Huang, T; Finkelstein, Ea; Sacher, Pm; Kelder, Sh**

**Efficacy of a Community- Versus Primary Care-Centered Program for Childhood Obesity: TX CORD RCT**

| Study  Identification |  |  |  |  |  |  |  |
| --- | --- | --- | --- | --- | --- | --- | --- |
| Sponsorship  source | This research w as supported by cooperative agreement RFA-DP-11-007 from the Centers for Disease Control and Prevention. Additional support w as provided  by the Michael and Susan Dell Foundation through the Michael & Susan Dell Center for Healthy Living. | | | | | | |
| Country | USA |  |  |  |  |  |  |
| Setting | - |  |  |  |  |  |  |
| Comments | - |  |  |  |  |  |  |
| Authors  name | - |  |  |  |  |  |  |
| Institution | - |  |  |  |  |  |  |
| Email | - |  |  |  |  |  |  |
| Address | - |  |  |  |  |  |  |
| Methods | | | | | | | |
| Design | Randomized  controlled trial |  |  |  |  |  |  |
| Group | Parallel group |  |  |  |  |  |  |
| IRB | Institutional Review Boards for Human Subject Research for University of Texas Health Science Center, Baylor College of Medicine, and Seton Healthcare Family approved all protocols. Inf ormed consent covering parent and child participation w as obtained from at least one parent or primary  caretaker, and w ritten assent w as obtained from children aged 6 to 12 years. | | | | | | |
| Outcomes  other than BMI | Other obesity, blood pressure, psychosocial | |  |  |  |  |  |
| Population | | | | | | | |
| Inclusion  criteria | Inclusion criteria for the children w ere ages 2 to 12 years and BMI>/=85th percentile | | | |  |  |  |
| Exclusion  criteria | Exclusion criteria w ere complications of obesity that w ould interfere w ith exercise (e.g., orthopedic problems);  obesity-related conditions, such as systematic steroid use or | | | | |  |  |
| Group  differences | Randomized |  |  |  |  |  |  |
| Special  populations | Low income,  ethnically diverse |  |  |  |  |  |  |
|  | Next Steps Ages 2-5 y Comparison | MEND Ages 2-5 y Intervention | Next Steps Ages 6- 8 y Comparison | MEND/ CA TCH Ages 6-  8 y Intervention | Next Steps Ages 9- 12 y Comparison | MEND/ CA TCH Ages 9-  12 y Intervention | Overall |
| N enrolled | 60 | 100 | 68 | 113 | 106 | 102 | 549 |
| Sex | NR | NR | NR | NR | NR | NR | 49.5%  male, 50.5  female |
| Age in years | NR | NR | NR | NR | NR | NR | NR |
| Race | NR | NR | NR | NR | NR | NR | 86%  Hispanic, 12%  Black |
| BMI % 95th | 110.2 | 113 | 116.8 | 120 | 117.2 | 117.5 | NR |
| Interventions |  |  |  |  |  |  |  |

|  | Next Steps Ages 2-5  y Comparison | MEND Ages 2-5 y  Intervention | Next Steps Ages 6-  8 y Comparison | MEND/ CA TCH Ages 6-  8 y Intervention | Next Steps Ages 9-  12 y Comparison | MEND/ CA TCH Ages 9-  12 y Intervention |
| --- | --- | --- | --- | --- | --- | --- |
| Intervention as defined by author | The comparison w as a 12-month clinic-based program, Next Steps(16), w hich  w as conducted at  12 primary care clinics and entailedthe  follow ing: electronic health record changes including BMIscreening; an alert for BMI85th percentile; diagnosis codes, labo-ratory tests, and ref errals common in obesity management; NextSteps brief counseling materials for primary care providers; and Next Steps activity booklets for parents and children to  w ork onnutrition and physical activity targets in a self-  directed manner | The intervention conducted at YMCA entailed the follow ing:   1. a 3-month Intensive Phase, w hich included MEND 2-5 for children aged 2-5 years and MEND/ CA TCH6-12 for children aged 6-12 years and their parents/caretakers, and 2. a 9-month Transition Phase, in w hich   reinf orcement sessions w ere offered monthly for the children and parents/caretakers, and YMCA sports (basketball, flag football, soccer, sw imming,  fitness) w ere offered  tw ice w eekly for school- aged children.  MEND/ CA TCH6-12 w as  administered separately for children aged 6-8 and 9-12. | The comparison (Next Step) w as a 12-month clinic- based program. It entailed the  follow ing: electronic health record changes including BMI screening; an alert for BMI  85th percentile; diagnosis codes, laboratory tests, and ref errals common in obesity manage | The intervention conducted at YMCA entailed the follow ing:   1. a 3-month Intensive Phase, w hich included MEND 2-5 for children aged 2-5 years and MEND/ CA TCH6-12 for children aged 6-12 years and their parents/caretakers, and 2. a 9-month Transition Phase, in w hich   reinf orcement sessions w ere offered monthly for the children and parents/caretakers, and YMCA sports (basketball, flag football, soccer, sw imming,  fitness) w ere offered  tw ice w eekly for school- aged children.  MEND/ CA TCH6-12 w as  administered separately for children aged 6-8 and 9-12. | The comparison (Next Step) w as a 12-month clinic- based program. It entailed the  follow ing: electronic health record changes including BMI screening; an alert for BMI  85th percentile; diagnosis codes, laboratory tests, and ref errals common in obesity management; | The intervention conducted at YMCA entailed the follow ing:   1. a 3-month Intensive Phase, w hich included MEND 2-5 for children aged 2-5 years and MEND/ CA TCH6-12 for children aged 6-12 years and their parents/caretakers, and 2. a 9-month Transition Phase, in w hich   reinf orcement sessions w ere offered monthly for the children and parents/caretakers, and YMCA sports (basketball, flag football, soccer, sw imming,  fitness) w ere offered  tw ice w eekly for school- aged children.  MEND/ CA TCH6-12 w as  administered separately for children aged 6-8 and 9-12. |
| Intervention  type (choose one) | Lifestyle | Lifestyle | Lifestyle | Lifestyle | Lifestyle | Lifestyle |
| Intervention length | 12 months | 12 months | 12 months | 12 months | 12 months | 18 tw ice-w eekly sessions (120minutes) w ith monthly boosters in  transition phase |
| Intensity as described by authors | Families  w ereencouraged to seek follow -up clinic visits to address childhood obe-sity for an estimated 8 hours of contact | MEND2-5 offered 27 hours of contact | Families  w ereencouraged to seek follow -up clinic visits to address childhood obe-sity  for an estimated 8  hours of contact | MEND/ CA TCH6-  12provided 49.5 hours plus 72 hours of YMCA sports | Families  w ereencouraged to seek follow -up clinic visits to address childhood obe-sity  for an estimated 8  hours of contact | MEND/ CA TCH6-  12provided 49.5 hours plus 72 hours of YMCA sports |
| Assigned  Intensity | 5-25 hours | 26-51 hours | 5-25 hours | >=52 hours | 5-25 hours | >=52 hours |
| Provider type (select  all) | Primary Care | Nutrition providers, other (community health  w orkers) | Primary care | Nutrition providers, other (community health  w orkers) | Primary care | Nutrition providers, other (community health  w orkers) |

| Clinic setting (choose one—  probably) | Primary Care | YMCA | Primary Care | YMCA | Primary Care | YMCA |
| --- | --- | --- | --- | --- | --- | --- |
| Components (choose all) | Nutrition counseling, activity counseling, motivational interview ing | Nutrition counseling, activity counseling, nutrition training, activity training, community  recreation center | Nutrition counseling, activity counseling, motivational  interview ing | Nutrition counseling, activity counseling, nutrition training, activity training, community  recreation center | Nutrition counseling, activity counseling, motivational  interview ing | Nutrition counseling, activity counseling, nutrition training, activity training, community  recreation center |

| Outcomes |  |  |  |  |  |  |  |  |  |  |
| --- | --- | --- | --- | --- | --- | --- | --- | --- | --- | --- |
| %-BMIp95 |  |  |  |  |  |  |  |  |  |  |
|  | 3 mo vs.  baseline |  |  |  |  | 12 mo vs. 3  mo |  |  |  |  |
|  | N | Mean | SE | p (w ithin  group) | p (betw een  groups) | N | Mean | SE | p (w ithin  group) | p (betw een  groups) |
| Next Steps Ages 2-5 y Comparison | 60 | -0.58 | 0.82 | NS | NS | 60 | 1.92 | 0.94 | <0.05 | NS |
| MEND Ages 2-5 y Intervention | 100 | -1.29 | 0.62 | <0.05 |  | 100 | 1.77 | 0.74 | <0.05 |  |
| Next Steps Ages 6-8 y Comparison | 68 | -0.39 | 0.8 | NS | <0.05 | 100 | 1.15 | 0.88 | NS | NS |
| MEND/ CA TCH Ages 6-8 y  Intervention | 113 | -2.32 | 0.6 | <0.05 |  | 113 | 1.74 | 0.7 | <0.05 |  |
| Next Steps Ages 9-12 y Comparison  MEND/ CA TCH Ages 9-12 y | 106  102 | -1.21  -2.59 | 0.55  0.55 | <0.05  <0.05 | NS | 106  102 | 0.96  0.6 | 0.61  0.68 | NS  NS | NS |
| Intervention  BMI (kg/m2) | | | | | | | | | | |
|  | 3 mo vs.  baseline |  |  |  |  | 12 mo vs. 3  mo |  |  |  |  |
|  | N | Mean | SE | p (w ithin  group) | p (betw een  groups) | N | Mean | SE | p (w ithin  group) | p (betw een  groups) |
| Next Steps Ages 2-5 y Comparison | 60 | -0.1 | 0.16 | NS | NS | 60 | 0.5 | 0.18 | <0.05 | NS |
| MEND Ages 2-5 y Intervention | 100 | -0.19 | 0.13 | NS |  | 100 | 0.6 | 0.15 | <0.05 |  |
| Next Steps Ages 6-8 y Comparison | 68 | 0.17 | 0.16 | NS | <0.05 | 68 | 1.12 | 0.17 | <0.05 | NS |
| MEND/ CA TCH Ages 6-8 y  Intervention | 113 | -0.25 | 0.12 | <0.05 |  | 113 | 1.26 | 0.14 | <0.05 |  |
| Next Steps Ages 9-12 y  Comparison | 106 | -0.01 | 0.14 | NS | NS | 106 | 1.19 | 0.14 | <0.05 | NS |
| MEND/ CA TCH Ages 9-12 y  Intervention | 102 | -0.29 | 0.13 | <0.05 |  | 102 | 1.2 | 0.15 | <0.05 |  |

**Casazza, K; Cardel, M; Dulin-Keita, A; Hanks, Lj; Gower, Ba; Newton, Al; Wallace, S**

**Reduced carbohydrate diet to improve metabolic outcomes and decrease adiposity in obese peripubertal African American girls**

| Study  Identification |  |  |  |
| --- | --- | --- | --- |
| Sponsorship  source | The present study w as funded by grant NIH K99 DK083333, ThrasherResearch Fund, University of Alabama Center for Women’s Reproduc-tive Health  P/F Grant, CA-47888, NIH P60DK07962 6, P30 DK056336 | | |
| Country | USA |  |  |
| Methods | | | |
| Design | Randomized controlled trial |  |  |
| Group | Parallel group |  |  |
| IRB | The protocol w asapproved by the institutional review board for human subjects atthe University of Alabama at Birmingham (UAB). | |  |
| Outcome other  than BMI | Other obesity, Lipids, Glucose metabolism |  |  |
| Population | | | |
| Inclusion criteria | overw eight/obese (ranging from 92ndbody mass index [BMI] percentile and above) AA girls ages 9 to14 years.; pubertal stage II to V | |  |
| Exclusion criteria | Exclusion criteria w ere medical diagnoses and/or taking medications know n to affect body composition, metabolism, cardiac function, and the like. | |  |
| Group  differences | Randomized |  |  |
| Special  populations | None |  |  |
|  | STAN (standard carbohydrate) | SPEC (reduced carbohydrate) | Overall |
| N | 14 | 12 | 26 |
| Sex | 100% female | 100% female | 100%  female |
| Age | 12.5 | 12.4 | 12.4 |
| Race | 100% black | 100% black | 100%  black |
| BMI SDS | 2.5 | 2.2 | 2.4 |
| Interventions | |  |  |
|  | STAN (standard carbohydrate) | SPEC (reduced carbohydrate) |  |
| Intervention as described by authors | The 16-w eek intervention included 2 phases: a 5-w eek eucaloric (w eight stable) phase and an 11-w eek hypocaloric (w eight loss,  approximately 1000-calorie reduction) phase. All food w as provided for both phases of the study, w ith overall energy amount determined according to resting energy requirements. The STAN comprised 55% of  energy from CHO and 27% of energy from fat | The 16-w eek intervention included 2 phases: a5-w eek eucaloric (w eight stable) phase and an 11-w eek hypocaloric(w eight loss, approximately 1000-calorie reduction) phase. All foodw as provided  for both phases of the study. The SPEC comprised 42% of energy from CHOand 40% of energy from fat. |  |
| Intervention type | Specific diet | Specific diet |  |
| Intervention  length | 16 w eeks | 16 w eeks |  |
| Intensity as described by  authors | At baseline, participants attended 2 visits. Participants w ere w eighed tw ice per w eekto ensure compliance w ith the diet. | At baseline, participants attended 2 visits. Participants w ere w eighed tw ice per w eekto ensure compliance w ith the diet. |  |
| Assigned  intensity | 5-25 hours | 5-25 hours |  |
| Provider types | Nutrition provider | Nutrition provider |  |
| Clinic setting | Research | Research |  |
| Components | Nutrition counseling, activity counseling, other (specific diet) | Nutrition counseling, activity counseling, other (specific diet) |  |

| Outcomes |  |  |  |  |  |
| --- | --- | --- | --- | --- | --- |
| Weight, kg |  |  |  |  |  |
| 16 w eeks | | | | | |
|  | N | Mean | SD | p (w ithin group) | p (betw een groups) |
| STAN (standard carbohydrate) | 14 | -4.5 | 1 | <0.01 | 0.09 |
| SPEC (reduced carbohydrate) | 12 | -5 | 0.9 | <0.001 | - |

**Chen, J. L.; Guedes, C. M.; Cooper, B. A.; Lung, A. E.**

**Short-Term Efficacy of an Innovative Mobile Phone Technology-Based Intervention for Weight Management for Overweight and Obese Adolescents: Pilot Study**

| Study  Identification |  |  |  |
| --- | --- | --- | --- |
| Sponsorship  source | Supported by the American Nurses Foundation Research Grant and the National Center for Advancing Translational Sciences, National Institutes of Health,  through UCSF-CTSI UL1TR00187 2. | | |
| Country | USA |  |  |
| Methods | | | |
| Design | Randomized controlled trial |  |  |
| Group | Parallel group |  |  |
| Outcomes  other than BMI | Other obesity, blood pressure, behaviors, self -efficacy |  |  |
| IRB | The studyw as approved by the Committee on Human Research at theUniversity of California, San Francisco (#12-09686) | |  |
| Population | | | |
| Inclusion criteria | To be eligible to participate in the study, an adolescent had to(1) be aged betw een 13 and 18 years, (2) have a BMI greaterthan or equal to 85th percentile (as indicated by the CDC grow thchart), (3) ow n a mobile phone, (4) have access to a computerw ith Internet access, (5) be able to speak and read English, and(6) be a patient at one of the clinics participating in the study.Eligible adolescents also had to be in good health, be free ofacute or life-threatening disease, and be  able to engage inactivities of daily living such as attending school | | |
| Exclusion  criteria | See inclusion criteria. |  |  |
| Group  differences | Randomized |  |  |
| Special  populations | May be Chinese immigrants but they had to speak English? |  |  |
|  | Intervention (iStart Smart) | Control | Overall |
| N | 23 | 17 | 40 |
| Sex | 58% male | 53% male | 58% (I think this is a reporting  error) |
| Age (mean and  range) | 15 | 14.77 | 14.9 |
| Race | NR | NR | 90%  Chinese- American |
| BMI SDS | 1.6 | 1.54 | NR |
| Interventions | |  |  |
|  | Intervention (iStart Smart) | Control |  |
| Intervention as defined by author | The fmobile phone-based intervention had three components:use of the Fitbit Flex (6 months), participation in the iStart Smartfor Teens online educational program (3 months), and receiptof biw eekly text messages during the maintenance phase (3months; see Figure 1). Theeight- module iStart Smart for Teens educational program usedan online  format consisting of short videos and animationnarratives; the modules  w ere accessible via both mobile phoneand computer. In addition, the | Control groupparticipants w ere given an Omron HJ-105 pedometer and ablank food-and-activity diary and w ere asked to use thepedometer and diary for 3 months. Participants w ere asked torecord and track physical activity, sedentary activity, and foodintake in the diary. They also accessed an online program thatconsisted of eight modules related to general adolescent healthissues, such as |  |

|  | mobile phone-based interventionparticipants received instructions regarding topically relevantactivities via mobile phone or computer; supplementary general inf ormation and tips w ere presented via app messages. 3-month maintenance phase. During thismaintenance phase, participants received biw eekly text messages that encouraged  and stabilized positive behavior changes. | diet and nutrition, dental care, saf ety, commondermatology care, and risk-taking behaviors. |
| --- | --- | --- |
| Intervention type | Lifestyle | Lifestyle |
| Intervention  Length | 6 months (3 month intervention, plus 3 months maintenance period w ith  biw eekly texts) | 3 months |
| Intensity as described by  authors | 8 10-minute modules, text messages, fitbit | "8 modules" |
| Assigned  Intensity | <5 hours | <5 hours |
| Provider types | Other--trained research assistant | Other--trained research assistant |
| Clinic setting | Primary care (recruitment); other (online content) | Primary care (recruitment); other (online content) |
| Components | Nutrition counseling, activity counseling, other (online content) | General health counseling |

| Outcomes |  |  |  |  |  |  |  |  |  |
| --- | --- | --- | --- | --- | --- | --- | --- | --- | --- |
| BMI |  |  |  |  |  |  |  |  |  |
|  | Baseline |  |  | 3 months |  |  | 6 months |  |  |
|  | mean | SD | N | mean | SD | N | mean | SD | N |
| Intervention (iStart Smart) | 27.37 | 3.26 | 23 | 26.91 | 3.25 | 23 | 26.93 | 3.43 |  |
| Control | 28.35 | 4.36 | 17 | 28.81 | 4.43 | 17 | 29.18 | 3.88 |  |
| BMI SDS | | | | | | | | | |
|  | Baseline |  |  | 3 months |  |  | 6 months |  |  |
|  | mean | SD | N | mean | SD | N | mean | SD | N |
| Intervention (iStart Smart) | 1.6 | 0.5 | 23 |  |  |  | 1.42 | 0.38 |  |
| Control | 1.54 | 0.42 | 17 |  |  |  | 1.8 | 0.5 |  |

**Crabtree, V. M.; Moore, J. B.; Jacks, D. E.; Cerrito, P.; Topp, R. V.**

**A transtheoretical, case management approach to the treatment of pediatric obesity**

| Study Identification |  |  |  |
| --- | --- | --- | --- |
| Sponsorship source | This study w as supported by a University of Louisville School of Medicine Grant-in-Aid. |  |  |
| Country | USA |  |  |
| Methods |  |  |  |
| Design | Randomized controlled trial |  |  |
| Group | Parallel group |  |  |
| IRB | This study w as approved by the Institutional Review Board at the University of Louisville, and inf ormed consent/assent w as obtained for all participants | | |
| Outcomes other  than BMI | Physical Activity |  |  |
| Population |  |  |  |
| Inclusion criteria | Nineteen obese (BMI ≥ 95th percentile for age and sex) AA children ages 8-12 years w ere recruited during office visits at 2 urban pediatric clinics. | |  |
| Exclusion criteria | NR |  |  |
| Group differences | Randomized |  |  |
|  | Case Management Intervention | Usual care | Overall |
| N enrolled | 10 | 9 | 19 |
| Sex | Male 3, female 6 | 66% f, 33% m | 19 |
| Age in years | 10.9 | 11.2 | NR |
| Race | 10 AA | 9 AA | 19 AA |
| BMI | 31.1 (5.0) | 30.8 (3.0) | NR |
| BMI percentile by  age | 98.4 (1.9) | 98.9 (0.7) | NR |
| Weight (kg) | 71.7 ± 16.6 | 73.6 ± 15.3 | NR |
| Interventions | |  |  |
|  | Case Management Intervention | Usual care |  |
| Intervention as defined by author | Depending on the stage of change for the parent and child, an intervention w as designed that w as either cognitive or behavioral in nature. Cognitive interventions w ere selected for families in the precontemplation and contemplation stages,  w hereas behavioral interventions w ere used for those in the action or maintenance stages. 3 The case manager delivered the module during a w eekly phone call and assisted the parent and child in identifying barriers to completing the activity,  and then modified the activity or selected a new activity to be performed during the subse-quent w eek. | The control group received usual care |  |
| Intervention type  (choose one) | Lifestyle | Usual care |  |
| Intervention length | 12 w eeks | Usual care |  |
| Intensity as described by authors | The case manager delivered the module during a w eekly phone call and assisted the parent and child in identifying barriers to completing the activity, and then modified the activity or selected a new activity to be performed during the subsequent w eek. After each 4-w eek period, the case manager met w ith the family, collected all of the w eekly compliance records,  and administered the modified URICA to both the parent and child. Based on the results of the assessment, the next 4-w eek  intervention w as designed. | Usual care |  |
| Assigned Intensity | 5-25 hours | <5 hours |  |
| Provider type  (select all) | Primary care, Psychosocial support | Primary care |  |
| Clinic setting  (choose one— probably) | Primary care | Primary care |  |
| Components  (choose all) | Motivational interview ing, nutrition counseling, activity counseling | Usual care only |  |

| Outcomes |  |  |  |  |
| --- | --- | --- | --- | --- |
| Change in BMI percentile |  |  |  |  |
|  | Baseline |  | 12 w eeks |  |
|  | Mean | SD | Mean | SD |
| Case Management Intervention | 98.4 | 1.9 | 96.9 | 6.5 |
| Usual care | 98.9 | 0.7 | 98.6 | 0.8 |
| BMI | | | | |
|  | Baseline |  | 12 w eeks |  |
|  | Mean | SD | Mean | SD |
| Case Management Intervention | 31.1 | 5 | 30.8 | 5.4 |
| Usual care | 30.8 | 3 | 30.7 | 3.4 |

**Croker, H; Viner, Rm; Nicholls, D; Haroun, D; Chadwick, P; Edwards, C; Wells, Jc; Wardle, J**

**Family-based behavioural treatment of childhood obesity in a UK National Health Service setting: randomized controlled trial**

| Study  Identification |  |  |  |
| --- | --- | --- | --- |
| Sponsorship  source | The trial w as funded by Cancer Research UK, Great Ormond Street Hospital and Weight Concern. |  |  |
| Country | UK |  |  |
| Methods | | | |
| Design | Randomized controlled trial |  |  |
| Group | Parallel group |  |  |
| IRB | Ethical approval w as obtained from the Research Ethics Committee at Great Ormond Street/Institute of Child Health(registration number 03BS18). Written inf ormed consent w as obtained from all children and  parents/guardians. |  |  |
| Outcomes other  than BMI | BMI, other obesity, blood pressure, psychosocial, mental health. |  |  |
| Population | | | |
| Inclusion criteria | Children w ere eligible to participate if they w ere 8–12 years of age; overw eight or obese according to the International Obesity Task Force (IOTF) definition; had at least one parent or guardian w illing to participate in treatment; and parent and child had sufficient command of English to participate in groups and understand the  programme materials. |  |  |
| Exclusion criteria | Exclusion criteria w ere an identified medical cause for obesity (for example, hypothyroidism, Prada Willi syndrome, single-gene def ects), type-2 diabetes, taking obesity medication, undergoing obesity treatment,  significant learning difficulties, significant mental health problems in child or parent, or currently receiving psychological or psychiatric treatment, including psychotrophic medication. |  |  |
| Group differences | Randomized |  |  |
|  | Family Based Behavioral Treatment | Wait-list control | Overall |
| N | 37 | 35 | 72 |
| Sex | 29.7% male | 31.4% male | 30.6% male |
| Age | 10.8 | 9.8 | 10.3 |
| Race | 67.6% w hite, 18.9% black, 10.8% Asian, 2.7% other | 45.7% w hite,  20.0% black,  17.1% asian,  17.1% other | 56.9% w hite,  19.4% black,  13.9% asian,  9.7% other |
| BMI SDS | 3.1 | 3.3 | 3.2 |
| Interventions | |  |  |
|  | Family Based Behavioral Treatment | Wait-list control |  |
| Intervention as defined by author | FBBT is a structured intervention comprising advice on w hole-family lifestyle change, w ith a behavioural w eight control programme for the overw eight child. Children w ere required to attend w ith one parent or carer, w ith a maximumof 8–10 families per group. The aims w ere to reduce fat and energy intake, increase physical activity  and change parent–child interactions. | Waitlist control |  |
| Intervention Type | Lifestyle | NA |  |
| Intervention  length | 6 months | NA |  |
| Intensity as  described by authors | The intervention theref ore comprised 15 sessions over 6 months(10 w eekly, 3 fortnightly, 2 monthly). Sessions took place in the late afternoon (after the school day) and lasted for approximately 1.5 h | NA |  |

| Assigned  intensity | 5-25 hours | NA |
| --- | --- | --- |
| Provider types | Primary care (ref erral), nutrition provider, mental health, other (research) | NA |
| Clinic setting | Primary care | NA |
| Components | Nutrition counseling, activity counseling, mental health | Usual care only |

| Outcomes |  |  |  |  |  |
| --- | --- | --- | --- | --- | --- |
| BMI SDS |  |  |  |  |  |
|  | 6 months |  |  |  |  |
|  | N | Mean | SD | p (w ithin group) | p (betw een groups) |
| Family Based Behavioral Treatment | 33 | -0.11 | 0.16 | <0.01 | NS |
| Wait-list control | 30 | -0.1 | 0.16 | <0.01 | - |

**DÃ-az, Rg; Esparza-Romero, J; Moya-Camarena, Sy; Robles-SardÃ-n, Ae; Valencia, Me**

**Lifestyle intervention in primary care settings improves obesity parametersamong Mexican youth**

| Study  Identification |  |  |  |
| --- | --- | --- | --- |
| Sponsorship  source | This w ork w as supported by a grant from the International Atomic Energy Agency (ARCAL 6/059) and CONACyT (R/182996). | |  |
| Country | Mexico |  |  |
| Methods |  |  |  |
| Design | Randomized controlled trial |  |  |
| Group | Parallel group |  |  |
| IRB | This study w as approved by the CIAD Institutional Review Board. |  |  |
| Outcomes other  than BMI | Other obesity, blood pressure, lipids, glucose |  |  |
| Population | | | |
| Inclusion criteria | Criteria for participation included age betw een 9 and 17 years, BMI >95th percentile based on the Centers for Disease Control and Prevention grow th chart  (15) or BMI >90th percentile w ith w aist circumference >90th percentile (16), caregivers interested in w eight control, and w illingness to attend the group educational sessions. | | |
| Exclusion criteria | Exclusion criteria included glucose intolerance or type 2 diabetes, psychiatric disorders, any medical condition that w ould preclude participation in the study, the use of medication that affected w eight, or involvement in a w eight loss program or structured physical activity. Participants w ho had lost w eight during the  4 months bef ore the study w ere also excluded. | | |
| Group differences | Randomized |  |  |
| Special  Populations | None |  |  |
|  | Lifestyle | Control | Overall |
| N | 21 | 22 | 43 |
| Sex | 48% male | 50% male | NR |
| Age | 11.6 | 11.7 | NR |
| Race | NR | NR | NR |
| BMI SDS | 2.12 | 2.07 | NR |
| Interventions | |  |  |
|  | Lifestyle | Control |  |
| Intervention as described by  authors | Participants randomized to lifestyle intervention attended a family-centered program consisting of 12 sessions of behavioral curriculum, dietary advice from a registered dietitian (w eekly for the  first 3 months and monthly thereafter), and monthly consultations w ith a primary care physician | Control group participants attended monthly consultations w ith a primary care physician  w ho received a brief training on obesity |  |
| Intervention type | Lifestyle | Lifestyle |  |
| Intervention length | 12 months | 12 months |  |
| Intensity as described by authors | The program consisted of 12 consecutive, w eekly,2-hour group sessions in the clinic. Participants and their parents attendedw eekly consultations w ith the RD during the first 12consecutive w eeks of the study and monthly thereafter. Participants and their parents  hadmonthly consultations of 10 to 15 minutes w ith a primarycare physician. | Participants in the control group and their parents at-tended monthly consultations of  10 to 15 minutes inlength w ith a primary  care physician. |  |
| Assigned intensity | 26-51 hours | <5 hours |  |
| Provider types | Primary care, nutrition provider | Primary care |  |
| Clinic setting | Primary care | Primary care |  |
| Components | Nutrition counseling, activity counseling | Nutrition counseling, activity counseling |  |

| Outcomes |  |
| --- | --- |
| BMI SDS |  |
| 6 months | 12 months |

|  | N | Mean | SD | p (w ithin group) | p (betw een groups) | N | Mean | SD | p (w ithin group) | p (betw een groups) |
| --- | --- | --- | --- | --- | --- | --- | --- | --- | --- | --- |
| Lifestyle | 21 | -0.31 | 0.2 | <0.05 | <0.05 | 21 | -0.29 | 0.24 | <0.05 | <0.05 |
| Control | 22 | -0.07 | 0.12 | <0.05 |  | 22 | -0.09 | 0.23 | NS |  |

**Davis, Am; James, Rl; Boles, Re; Goetz, Jr; Belmont, J; Malone, B**

**The use of TeleMedicine in the treatment of paediatric obesity: feasibility and acceptability**

| Study  Identification |  |  |  |
| --- | --- | --- | --- |
| Sponsorship  source | This research w as supported by grants from The Sun-flow er Foundation: Healthcare for Kansans, and by the National Institute of Diabetes and Digestive and  Kidney Diseases (K23 DK068221). | | |
| Country | USA |  |  |
| Methods | | | |
| Design | Randomized controlled trial |  |  |
| Group | Parallel group |  |  |
| IRB | Institutional Review Board approval w as obtained, and signed consent/assent forms w ere returned to research personnel via school personnel. | | |
| Outcomes other  than BMI | Behaviors |  |  |
| Population | | | |
| Inclusion criteria | 5th grade children, The nurses targeted families of children w ho w ere overw eight or obese (BMI85th percentile for age and gender). | |  |
| Exclusion criteria | Major developmental difficulties that w ould interfere w ith participation in a group programme | |  |
| Group  differences | Randomized |  |  |
| Special  populations | Rural population |  |  |
|  | Telemedicine | Physician Visit | Overall |
| N | NR | NR | 17 |
| Sex | NR | NR | 58.8% female |
| Age | NR | NR | 9.9 |
| Race | NR | NR | 47.1% w hite,  47.1% African  American, 5.9% Hispanic |
| BMI Percentile | 95.3 | 95.7 | NR |
| Interventions | |  |  |
|  | Telemedicine | Physician Visit |  |
| Intervention as described by authors | The TeleMedicine intervention w as composed of four 1-h long group sessions delivered over an 8-w eek period. Parents and children attended each session, along w ith the school nurse. Groups w ere led by a PhD level psychologist via TeleMedicine from a tertiary care medical centre. At the end of each meeting, the children returned to the TeleMedicine room and w orked  w ith parents and the psychologist to set goals for the upcoming w eek | The physician visit intervention w as composed of a single visit w ith the child’s primary care physician. To standardize visits and assure the visit took place, a list of topics w as sent to each child’s physician suggesting w hat they may w ant to discuss during the visit. |  |
| Intervention type | Lifestyle | Lifestyle |  |
| Intervention  length | 2 months | 1 visit |  |
| Intensity as  described by authors | 4 1-hour group session | 1 visit |  |
| Assigned intensity | <5 hours | <5 hours |  |
| Provider types | Mental health, other (school nurse) | Primary care |  |
| Clinic setting | School based health center | Primary care |  |
| Components | Nutrition counseling, Activity counseling, mental health, other (telemedicine) | Nutrition counseling, activity counseling |  |

| Outcomes |  |
| --- | --- |
| BMI Percentile |  |
|  | 12 months |
|  | Text summary |
| Telemedicine | 14/17 follow ed-up, "no differences" |
| Physician Visit | No changes w ere seen at follow up |

**Davis, Am; Sampilo, M; Gallagher, Ks; Dean, K; Saroja, Mb; Yu, Q; He, J; Sporn, N**

**Treating rural paediatric obesity through telemedicine vs. telephone: outcomes from a cluster randomized controlled trial**

| Study  Identification |  |  |  |
| --- | --- | --- | --- |
| Sponsorship  source | The author(s) disclosed receipt of the follow ing financial supportfor the research, authorship, and/or publication of this article:funding from the National  Institutes of Health (NIDDK08101 6). | |  |
| Country | USA |  |  |
| Methods | | | |
| Design | Randomized controlled trial |  |  |
| Group | Parallel group |  |  |
| IRB | All study procedures w ere approved by the relevant Institutional Review Board. | |  |
| Outcomes other  than BMI | BMI, Behaviors, other |  |  |
| Population | | | |
| Inclusion criteria | Inclusion criteria w ere: children w ith BMI of > 85th for age/gender, family living in a rural area (city and/or county population < 20,000), child attending a school  w ith phone and Internet capabilities, and the family having access to a phone. | | |
| Exclusion criteria | Exclusion criteria w ere family moving to a non-rural area, child having physical limitation or receiving an injury w hich significantly limited physical mobility, child having a significant medical issue, or child and parents having significant developmental delay or cognitive impairment that w as know n to the school. No  children w ho met the inclusion criteria had to be excluded | | |
| Group  differences | Randomized |  |  |
|  | Telemedicine | Telephone | Overall |
| N enrolled | 42 | 61 | 103 |
| Sex | 17% m | 29% m | 46% m |
| Age in years | 9.39 | 8.97 | 9.14 |
| Race | 38% w | 52% w | 90% w |
| Child BMIz | 1.66 | 1.78 | 1.73 |
| Child BMI%ile | 94.02 | 94.49 | 94.3 |
| Parent BMI M | 33.43 | 30.88 | 31.81 |
| Interventions | |  |  |
| Intervention as | Telemedicine  The intervention w as based upon cognitive behavior family based,covering behavioral, nutrition and phys Topics included Goal Setting, Stop-Light Diet,16Sede Praising and Ignoring, Calorie Counting, Portion Siz anddressing tips for the large body types, among ot Each group session had specific objectives outlined manual and began w ith a short introduction and rev | Telephone  al theory and w as The intervention w as based upon cognitive behavioral theory and w as ical activity topics. family based,covering behavioral, nutrition and physical activity topics. ntary Activity, Topics included Goal Setting, Stop-Light Diet,16Sedentary Activity,  e, Self -Esteem, Praising and Ignoring, Calorie Counting, Portion Size, Self-Esteem, hers (see table 1). anddressing tips for the large body types, among others (see table 1). in a treatment Each group session had specific objectives outlined in a treatment  iew of w eekly goals manual and began w ith a short introduction and review of w eekly goals |  |
| defined by  author  Intervention type (choose one) | and progress led by both the off -site leader and the  representative. Then, the off -site leader (a clinician research team) met w ith the parents via the random (telemedi- cine, telephone), and simultaneously the representative met w ith the children in the next room manualized topics. All group meetings lasted approx The parent and child groups covered the same topic group w as more didactic and the child group more ac  Lifestyle | on-site school and progress led by both the off -site leader and the on-site school  member of the representative. Then, the off -site leader (a clinician member of the ized modality research team) met w ith the parents via the randomized modality on-site school (telemedi- cine, telephone), and simultaneously the on-site school  to cover their representative met w ith the children in the next room to cover their imately one hour. manualized topics. All group meetings lasted approximately one hour. s, but the parent The parent and child groups covered the same topics, but the parent tivity-based. group w as more didactic and the child group more activity-based.  Lifestyle |  |

| Intervention  length | 8 months | 8 months |
| --- | --- | --- |
| Intensity as  described by authors | The intervention consisted of eight w eekly meetings follow ed by six  monthly meetings, for a total intervention period of eight months, w hich w as Davis et al. 87 designed to coincide w ith a typical school year. | The intervention consisted of eight w eekly meetings follow ed by six  monthly meetings, for a total intervention period of eight months, w hich w as Davis et al. 87 designed to coincide w ith a typical school year. |
| Assigned  Intensity | 5-25 hours | 5-25 hours |
| Provider type  (select all) | Other (school personnel- nurse, gym teacher, computer teacher) and  member of clinical research team | Other (school personnel- nurse, gym teacher, computer teacher) and  member of clinical research team |
| Clinic setting  (choose one— probably) | Other- School setting | Other- School setting |
| Components  (choose all) | Nutrition counseling, activity counseling, mental health | Nutrition counseling, activity counseling, mental health |

| Outcomes |  |  |  |  |  |  |
| --- | --- | --- | --- | --- | --- | --- |
| Changes in Child BMIz |  |  |  |  |  |  |
|  | Baseline |  | 8 w eeks |  | 8 months |  |
|  | Mean | SD | Mean | SD | Mean | SD |
| Telemedicine | 1.68 | 0.39 | -0.01 | 0.16 | 0 | 0.22 |
| Telephone | 1.77 | 0.51 | -0.07 | 0.19 | 0 | 0.18 |

**Davis, Am; Sampilo, M; Gallagher, Ks; Landrum, Y; Malone, B**

**Treating rural pediatric obesity through telemedicine: outcomes from a small randomized controlled trial**

| Study  Identification |  |  |  |
| --- | --- | --- | --- |
| Sponsorship  source | National Institutes of Health (DK068221 to A.M.D.). |  |  |
| Country | USA |  |  |
| Methods | | | |
| Design | Randomized controlled trial |  |  |
| Group | Parallel group |  |  |
| IRB | All study procedures w ere approved by the relevant institutional  review board. |  |  |
| Outcomes other than  BMI | Behaviors, Psychosocial |  |  |
| Population | | | |
| Inclusion criteria | School: Criteria for school participation included having rural designation (in a tow n or county w ith a population <20,000) and telemedicine capabilities (common in rural districts for distance learning).  Students: Inclusion criteria included living in a rural area and attending elementary school, BMI percentile 85th for age/gender, and parent’s ability to speak  English | | |
| Exclusion criteria | School: Schools that did meet the inclusion criteria  Students: Exclusion criteria included having a developmental disability that w ould prevent the child from participating in the group, or being immobile, w hich w ould  prevent them from increasing exercise. Parents and children w ho chose to participate gave inf ormed consent and assent, respectively. | | |
| Group  differences | Randomized |  |  |
| Special  Populations | Rural |  |  |
|  | Telemedicine group (intervention) | Physician visit group (comparison) | Overall |
| N enrolled | 31 | 27 | 58 |
| Sex n(%) | Male 70.69 (41) | Male 70.97 (22) | 41 (71%) male |
| Age in years  M(SD) | 8.48 (1.73) | 8.69 (1.78) | 8.55 (1.74) |
| Race | 30 (97%) Caucasian | 22(81%) Caucasian | Caucasian (89.66%)three w ere Native American (5.17%), and three (5.17%) did not indicate  their race/ethnicity |
| Child BMI percentile M  (SD) | 94.69 (4.13) | 93.78 (4.35) | 94.18 (4.27) |
| Maternal BMI M (SD) | 30.47 (8.93) | 31.25 (9.88) | 30.83 (9.30) |
| Interventions | |  |  |
|  | Telemedicine group (intervention) | Physician visit group (comparison) |  |
| Intervention as defined by author | Children and families  participated in 8 w eekly psychoeducational groups over telemedicine led by trained PHD-level psychologists or trained graduate students/postdoctoral fellow s, follow ed  by 6 monthly meetings. Topics that w ere covered included: 1  Overview of program and expectations; goal setting | Children and families randomized to the physician visit group agreed to meet w ith their primary care physician to discuss a standardized list of topics. Topics that w ere covered included the causes of obesity and the relationship betw een diet, exercise, and body mass index; the  importance of eating a balanced diet; and current exercise |  |

|  | 2 Use of goal charts; reinf orcement and incentives 3 Stop-light diet and nutrition recommendations   1. Screen time and sedentary activity; the importance of tracking; activity monitor results: your child’s data 2. Praising and ignoring: role play and homew ork 3. Diet recall results: your child’s data; calorie counting; healthy substitutions 4. Portion sizes: lesson, demonstration, and quiz 5. Self-esteem; dressing for larger body sizes; adult modeling: w hat I like about myself 6. Reading food labels and vitamins/minerals 10 The concept of nutrient density   11 Potlucks, BBQs, and other events: how to be smart 12 Exercising as a family   1. The application of energy balance 2. The use of privileges and maintenance | and  sedentary behavior recommendations for children. |
| --- | --- | --- |
| Intervention  length | 8 months | 1 visit |
| Intensity as described by authors | Children and families randomized to the TM intervention participated in 8 w eekly psychoeducational groups over telemedicine led by trained PHD-level psychologists or trained graduate students/postdoctoral fellow s, follow ed  by 6 monthly meetings. | Children and families randomized to the physician visit group agreed to meet w ith their primary care physicianto discuss a standardized list of topics. |
| Assigned  Intensity | 5-25 hours | <5 hours |
| Provider type (select  all) | Mental health, Other (School representative ) | Primary care |
| Clinic setting (choose one—  probably) | Telemedicine | Primary care |
| Components  (choose all) | Nutrition counseling and activity counseling, self esteem | Nutrition counseling and activity counseling |

| Outcomes |  |  |  |  |  |  |  |  |  |  |
| --- | --- | --- | --- | --- | --- | --- | --- | --- | --- | --- |
| Child BMIz Change |  |  |  |  |  |  |  |  |  |  |
|  | Pretreatment_month  1 |  |  |  | Posttreatment_ Month  8 | |  |  |  |  |
|  | Mean | SD | Change in  Mean | t-  statistics | p-  value | Mean | SD | Change in  Mean | t-  statistics | p-  value |
| Telemedicine group (intervention) | 1.88 | 0.52 |  |  |  | 1.76 | 0.52 | -0.12 | 3.018 | 0.007 |
| Physician visit group  (comparison) | 1.7 | 0.45 |  |  |  | 1.55 | 0.59 | -0.15 | 2.684 | 0.014 |

**Davoli, Am; Broccoli, S; Bonvicini, L; Fabbri, A; Ferrari, E; D'Angelo, S; Buono, A; Montagna, G; Panza, C; Pinotti, M; Romani, G; Storani, S; Tamelli, M; Candela, S; Giorgi, Rossi P**

**Pediatrician-led motivational interviewing to treat overweight children: an RCT**

| Study  Identification |  |  |  |
| --- | --- | --- | --- |
| Sponsorship  source | No external funding. |  |  |
| Country | Italy |  |  |
| Methods | | | |
| Design | Randomized controlled trial |  |  |
| Group | Parallel group |  |  |
| IRB | parents signedthe inf ormed consent form |  |  |
| Outcomes  other than BMI | Behaviors |  |  |
| Population | | | |
| Inclusion  criteria | Eligible partic-ipants w ere all overw eight children (85th$BMI percentile$95th)34betw een 4 and7 years old resident in the RE Provinceand assisted by that  pediatrician for atleast 12 months. | | |
| Exclusion criteria | Exclusion criteria w eremetabolic pathologic conditions and allpathologic conditions related to obesityand overw eight. Moreover, those familiesw ho did not consider childhood over-w eight a problem and w ere not in-terested in the negative consequences orin advice on how to lose w eight (familiesin  the“precontemplation stage”)w erealso excluded. | |  |
| Group  differences | Randomized |  |  |
| Special  Populations | None |  |  |
|  | Intervention | Usual Care | Overall |
| N | 187 | 185 | 372 |
| Sex | 40.1% male | 36.8% male | NR |
| Age | 6.7 | 6.5 | NR |
| Race | NR | NR | NR |
| BMI SDS | 1.35 | 1.35 | 1.35 |
| Interventions | |  |  |
|  | Intervention | Usual Care |  |
| Intervention as defined by author | A family pediatrician–led MI w as offeredto children assigned to the interventiongroup consisting of 5 individual meet-ings based on the transtheoreticalmodel of addiction and behavior change(Table 1).37The child and parents alw ayshad to leave the meeting having agreedon 2 objectives (1 concerning food and 1concerning PA  improvements) thatw ere clearly defined and achievable. | children w how ere randomly assigned to the controlgroup received a booklet w ith the maininf ormation on obesity prevention.During the year of intervention, theyreceived the usual care currently of -fered by pediatricians to  overw eightchildren (ie, opportunistic advice if thepediatricianisseeingthechildf orotherreasons). |  |
| Intervention  type | Lifestyle | Usual care |  |
| Intervention  length | 12 months | 12 months |  |
| Intensity as described by  authors | 1st Baseline MI=45-60 min; 2nd, after 1 month=45-60; 3rd, after 3 months=30 mins; 4th, after 3 months=30 mins; 5th, 1 yr after  baseline=45 | Usual care |  |
| Assigned  intensity | <5 hours | <5 hours |  |
| Provider types | Primary care | Primary care |  |
| Clinic setting | Primary care | Primary care |  |

| Components | Nutrition counseling, activity counseling, motivational interview ing | Usual care |
| --- | --- | --- |

| Outcomes |  |  |  |  |  |
| --- | --- | --- | --- | --- | --- |
| BMI SDS |  |  |  |  |  |
|  | 12 months |  |  |  |  |
|  | N | Mean | CI (low er bound) | CI (upper bound) | p (across groups) |
| Intervention | 176 | -0.11 | -0.17 | -0.05 | NS |
| Usual Care | 179 | 0.01 | -0.06 | 0.05 |  |
| BMI | | | | | |
|  | 12 months |  |  |  |  |
|  | N | Mean | CI (low er bound) | CI (upper bound) | p (across groups) |
| Intervention | 176 | 0.49 | 0.29 | 0.68 | 0.007 |
| Usual Care | 179 | 0.79 | 0.61 | 0.97 |  |

**de Ferranti, S. D.; Milliren, C. E.; Denhoff, E. R.; Quinn, N.; Osganian, S. K.; Feldman, H. A.; Ebbeling, C. B.; Ludwig, D. S. Providing food to treat adolescents at risk for cardiovascular disease**

| Study  Identification |  |  |  |
| --- | --- | --- | --- |
| Sponsorship source | Dr. de Ferranti w as supported by a National Institutes of Health Grant K23 HL 085308, by a Career Development Aw ard from Boston Children’s Hospital, by the Farb Family Fund, and by the Kostin Family Innovation Fund. Erica Rose Denhoff w as supported by the Boston Children’s Heart Foundation. Dr.  Feldman,Car ly Milliren, and Nicolle Quinn w ere supported by Harvard Catalyst, The Harvard Clinical and Translational Science Center (National Center for Research Resources and the National Center for Advancing Translational Sciences, National Institutes of Health Aw ard #UL1 RR 025758, and financial contributions from Harvard University and its affiliated academic health care centers). Dr. Ebbeling w as supported by the New Balance Foundation. Dr. Ludw ig  w as supported by a career aw ard from NIDDK (K24DK082730) | | |
| Country | USA |  |  |
| Setting | - |  |  |
| Comments | - |  |  |
| Authors name | - |  |  |
| Institution | - |  |  |
| Email | - |  |  |
| Address | - |  |  |
| Methods | | | |
| Design | Randomized controlled trial |  |  |
| Group | Parallel group |  |  |
| IRB | Written inf ormed consent w as obtained from participants or parents. The study w as approved by the BCH Institutional Review Board (clinicaltrials.gov  registrationNCT01 0803 39). | | |
| Outcomes other  than BMI | Other obesity, blood pressure, lipids, glucose metabolism, other labs, behaviors | |  |
| Population | | | |
| Inclusion  criteria | Indi-viduals aged 8-21 years w ere eligible to participate if they had ele-vated body mass index (BMI)85th percentile using CDC ref erencepopulation (20), a  fasting insulin10mU/ ml, and at least tw o addi-tional CV risk factors. | | |
| Exclusion criteria | Exclusioncriteria included w eight>275 lbs (125 kg) due to concerns aboutvenous access, current or anticipated pregnancy, major medical illnessor medications that might significantly affect CV risk factors or w eight(e.g., thyroid disorders), alcohol, tobacco, or other drug use, seriousfood allergy, or abnormalities at screening that indicated a need forpharmacotherapy. For this pilot study, w e also excluded participantsw hom w e anticipated w ould have significant difficulty  follow ing thestudy protocol (e.g., behavioral issues, major food restrictions, or aver-sions) or w ho lived outside a reasonable driving distance | | |
| Group  differences | Randomized |  |  |
| Special  populations | None |  |  |
|  | Low fat diet (LF) | Low glycemic load diet (LGL) | Overall |
| N | 12 | 15 | 27 |
| Sex | NR | NR | 33% male |
| Age | NR | NR | 13.2 |
| Race | NR | NR | 48% w hite,  19% black,  33% other,  26% Hispanic |
| BMI SDS | 1.99 | 2.09 | 2 |
| Interventions | |  |  |
|  | Low fat diet (LF) | Low glycemic load diet (LGL) |  |
| Intervention as  described by author | During the Intensive Phase all participants received 3 customized  meals and 1 snack per day prepared according to their assigned diets (LF orLGL) for 6 out of 7 days per w eek. On the 7th day participants | During the Intensive Phase all participants received 3 customized  meals and 1 snack per day prepared according to their assigned diets (LF orLGL) for 6 out of 7 days per w eek. On the 7th day |  |

|  | w ere instructed to eat along the assigned dietary strategy. Dietary change w as rein-forced by w eekly in-person home nutrition counseling and w eekly phone calls covering topics consistent w ith the participant’s group assignment using an adapted nutrition curriculum . During the Maintenance Phase, participants w ere asked to follow theirassigned dietary strategy w ith no provision of food or in-person con-tact. The study dietitians continued to provide behavioral support byphone at regular intervals (w eeks 10, 12, 16, and 20). The LF diet w as basedon contemporary dietary guidelines (20% total fat of w hich 7% w ere saturated fat). | participants w ere instructed to eat along the assigned dietary strategy. Dietary change w as rein-forced by w eekly in-person home nutrition counseling and w eekly phone calls covering topics consistent w ith the participant’s group assignment using an adapted nutrition curriculum . During the Maintenance Phase, participants  w ere asked to follow theirassigned dietary strategy w ith no provision of food or in-person con-tact. The study dietitians continued to provide behavioral support byphone at regular intervals (w eeks 10, 12, 16, and 20). The LGL diet targeted aglycemic index of 50% for each meal, calculated as product of theglycemic index of a food and the amount of carbohydrate in thatfood using glucose as the  ref erence. |
| --- | --- | --- |
| Intervention  type | Dieting | Dieting |
| Intervention  length | 2 months, 4 months maintenance | 2 months, 4 months maintenance |
| Intensity as described by  authors | 2 month intensive: Weekly in-person home nutrition counseling, w eekly hone calls; 4 additional contacts in maintenance phase | 2 month intensive: Weekly in-person home nutrition counseling, w eekly hone calls; 4 additional contacts in maintenance phase |
| Assigned  intensity | 5-25 hours | 5-25 hours |
| Provider types | Nutrition provider | Nutrition provider |
| Clinic setting | Research unit | Research unit |
| Components | Nutrition counseling, activity counseling, nutrition training | Nutrition counseling, activity counseling, nutrition training |

| Outcomes |  |  |  |
| --- | --- | --- | --- |
| BMI |  |  |  |
|  | 6 months |  |  |
|  | mean | SE | N |
| Low fat diet (LF) | 27.8 | 0.59 | 12 |
| Low glycemic load diet (LGL) | 30 | 1.27 | 15 |
| BMI SDS | | | |
|  | 6 months |  |  |
|  | mean | SE | N |
| Low fat diet (LF) | 1.84 | 0.06 | 12 |
| Low glycemic load diet (LGL) | 1.98 | 0.08 | 15 |

**de Niet, J.; Timman, R.; Bauer, S.; van den Akker, E.; Buijks, H.; de Klerk, C.; Kordy, H.; Passchier, J.**

**The effect of a short message service maintenance treatment on body mass index and psychological well-being in overweight and obese children: a randomized controlled trial**

| Study  Identification |  |  |  |
| --- | --- | --- | --- |
| Sponsorship  source | Support for this study w asreceived from Vodaf one, the Netherlands. Grantsw ere received from the Erasmus University MedicalCentre Rotterdam – MRACE  (Medical ResearchAdvice Committee) grant no. 2006-26 and Innova-tion Fund Insurances (Innovatief onds Verzekeringen)grant no. 06–334. | | |
| Country | The Netherlands |  |  |
| Methods | | | |
| Design | Randomized controlled trial |  |  |
| Group | Parallel group |  |  |
| IRB | The study protocol w as approved by theMedical Ethics Committee of the Erasmus MC Uni- versity Medical Centre Rotterdam and by the medicalethics committees of the participating  hospitals. |  |  |
| Outcomes other  than BMI | Psychosocial |  |  |
| Population | | | |
| Inclusion criteria | Inclusion criteria w ere being overw eight or obese, parent participation in the BFC and a sufficient know ledge of the Dutch language. | |  |
| Exclusion criteria | Exclusion criteria for overw eight and obese children participating in the BFC programme included behavioural problems defined as a score >70 on the Child  Behaviour Checklist (CBCL) (14) and any disease causing overw eight that could be treated w ith drugs and mental retardation. Furthermore, parents and child had to be both sufficiently fluent in the Dutch language and show sufficient motivation to actively participate in the programme. | | |
| Group  differences | Randomized |  |  |
| Special populations | None |  |  |
|  | SMSMT+ | Control group | Overall |
| N | 73 | 68 | 141 |
| Sex | 38% male | 34% male | 36%  male |
| Age | 10 | 9.8 | 9.9 |
| Race | Dutch- 78% | Dutch- 71% | Dutch-  75% |
| BMI SDS | 2.63 | 2.54 | 2.59 |
| Interventions | |  |  |
|  | SMSMT+ | Control group |  |
| Intervention as defined by author | Maintenance after 3 months of PWMP. Participants in the SMSMT group received a mobilephone for the period of the SMSMT intervention. The children w ere requested tosend  w eekly self-monitoring data on a five-point Likertscale via SMS. Next, the program suggested a feed-back message w ith a 160-character limitation out of alarge pool of pre-formulated statements, w hich w as tailored to the child's individual pattern of change inbehaviour. The  feedback w as checked for plausibilityby a researcher w ho tailored the feedback messagew hen  needed. | Usual care (in the PWMP) |  |
| Intervention type | Lifestyle | Lifestyle |  |
| Intervention  length | 9 months (maintenance) | 9 months (maintenance) |  |
| Intensity as described by authors | Weekly texting contact; follow -up group sessions forchildren and parents and individual appointments areorganized at 6, 9, and 12 months after the start ofthe programme. (90 min + 1 hour) | Follow -up group sessions forchildren and parents and individual appointments areorganized at 6, 9, and 12 months after the  start ofthe programme. (90 min + 1 hour) |  |

| Assigned  intensity | 5-25 hours | 5-25 hours |
| --- | --- | --- |
| Provider types | Primary care, nutrition provider, mental health, exercise | Primary care, nutrition provider, mental health,  exercise |
| Clinic setting | Multidisciplinary w eight management | Multidisciplinary w eight management |
| Components | Nutrition counseling, activity counseling, motivational interview ing, mental health, activity training, other (texting) | Nutrition counseling, activity counseling,  motivational interview ing, mental health, activity training |

| Outcomes |  |  |  |  |  |  |  |  |
| --- | --- | --- | --- | --- | --- | --- | --- | --- |
| BMI SDS |  |  |  |  |  |  |  |  |
|  | 6 months |  |  | 12 months | |  |  |  |
|  | N | Mean | SD | p (betw een groups) | N | Mean | SD | p (betw een groups) |
| SMSMT+ | 73 | 2.4 | 0.59 | 0.34 | 73 | 2.38 | 0.59 | 0.76 |
| Control group | 68 | 2.3 | 0.56 | - | 68 | 2.34 | 0.57 | - |

**DeBar, Ll; Stevens, Vj; Perrin, N; Wu, P; Pearson, J; Yarborough, Bj; Dickerson, J; Lynch, F**

**A primary care-based, multicomponentlifestyle intervention for overweight adolescent females**

| Study  Identification |  |  |  |
| --- | --- | --- | --- |
| Sponsorship  source | Funded by the National Institutes of Health (NIH). |  |  |
| Country | USA |  |  |
| Methods | | | |
| Design | Randomized controlled trial |  |  |
| Group | Parallel group |  |  |
| IRB | The HMO Human Subjects Pro-tection Committee approved and mon-itored all study procedures. Parents orguardians provided inf ormed consent,and  adolescents provided assent. | | |
| Outcomes other than  BMI | Psychosocial, mental health, behaviors, glucose metabolism, lipids |  |  |
| Population | | | |
| Inclusion  criteria | Eligibility w as limited to female healthplan members aged 12 to 17 years w ith an age-and gender-adjusted BMI>=90th percentile | |  |
| Exclusion  criteria | Exclusion criteria included: significant cognitiveimpair ment or psychosis, severe obe-sity (BMI.45), use of medicationsknow n to affect body w eight,  andpregnancy. | |  |
| Group  differences | Randomized |  |  |
| Special  populations | Adolescent females |  |  |
|  | Intervention | Control | Overall |
| N | 105 | 103 | 208 |
| Sex | 100% female | 100% female | 100% female |
| Age | 14.12 | 14.03 | 14.1 |
| Race | 71.43% w hite | 72.82% w hite | NR |
| BMI SDS | 2 | 2 | 2 |
| Interventions | |  |  |
|  | Intervention | Control |  |
| Intervention as defined by author | The multicomponent intervention included the follow ing: (1) change in dietary intake and eating patterns; (2) increasing physical ac-tivity by using developmentally tailored forms of exercise (eg, exergaming); (3) addressing issues associated w ith obesity in adolescent girls (eg, de-pression, disordered eating patterns, poor body image); and (4) training participants’ PCPs to support behavioral w eight management goals collaboratively. Over the intervention’s first 3 months, parents w ere invited to separate, w eekly group meetings, during w hich staff explained the nutritional and physical activity principles the teens w ould learn so that parents could help support their daughters and reduce potential barriers to success. | Usual care participants received a packet of materials, including outlines of evidence-based approaches to w eight management for youth and adults, a parents’ guide to help adolescents make healthy lifestyle changes, local resources for w eight management and healthy activity, and suggested books and online materials on healthy lifestyle change. Usual care participants also met w ith their PCPs at the study onset to encourage healthy  lifestyle changes, although PCPs w ere not given the tai-lored patient assessment summaries described earlier in the intervention arm  for use in their visit nor w ere usual care  participants scheduled for a 6-month study-related session w ith their PCPs. |  |
| Intervention  type | Lifestyle | Lifestyle |  |

| Intervention  length | 5 months | 6 months |
| --- | --- | --- |
| Intensity as described by authors | The teen intervention compromised 90-minute group meetings conducted over5 months. Groups met 16 times, w eekly for 3 months and biw eekly during months 4 and 5. At each session, teens w ere w eighed and review ed dietary and physical activity self-monitoring re-cords. If unable to attend a particular session, teens w ere offered telephone sessions. Baseline and 6 month PCP visit. | Usual care participants also met w ith their PCPs at the study onset to encourage healthy lifestyle changes, although PCPs w ere not given the tailored patient assessment summaries described earlier in the intervention arm for use in their visit nor w ere usual care participants scheduled for a 6-month  study-related session w ith their PCPs. |
| Assigned  intensity | 5-25 hours | <5 hours |
| Provider  types | Primary care, nutrition provider, mental health | Primary care |
| Clinic setting | Primary care | Primary care |
| Components | Nutrition counseling, activity counseling, nutrition training, activity training, mental health,  motivational interview ing, Other- Parent education, Other- PCP education | Usual care |

| Outcomes |  |  |  |  |  |  |  |  |
| --- | --- | --- | --- | --- | --- | --- | --- | --- |
| BMI SDS |  |  |  |  |  |  |  |  |
|  | 6 months |  |  | 12 months | |  |  |  |
|  | N | Mean | SD | p (betw een groups) | N | Mean | SD | p (betw een groups) |
| Intervention | 100 | 1.88 | 0.41 | NR | 90 | 1.85 | 0.46 | 0.012 |
| Control | 95 | 1.94 | 0.38 | - | 83 | 1.92 | 0.39 | - |

**Deforche, B; Bourdeaudhuij, I; Tanghe, A; Debode, P; Hills, Ap; Bouckaert, J**

**Post-treatment phone contact: a weight maintenance strategy in obese youngsters**

| Study  Identification |  |  |  |
| --- | --- | --- | --- |
| Sponsorship  source | None |  |  |
| Country | Belgium |  |  |
| Methods | | | |
| Design | Randomized controlled trial |  |  |
| Group | Parallel group |  |  |
| IRB | Written inf ormed consent w as obtained fromall participants and parents. |  |  |
| Outcomes other  than obesity | Behaviors |  |  |
| Population | | | |
| Inclusion criteria | Obese youngsters (16.372.6 y, 11.3–18.3 y) w hocompleted a 10-month residential treatment programm |  |  |
| Exclusion criteria | No additional |  |  |
| Group  differences | Randomized |  |  |
| Special  populations | None |  |  |
|  | Experimental | Control | Overall |
| N | 10 | 10 |  |
| Sex | 50% female | 50% female | 50%  female |
| Age | NR | NR | 16.3 |
| Race | NR | NR | NR |
| ABMI% | NR | NR | NR |
| Interventions | |  |  |
| Intervention as | Experimental  After initial treatment, both experimental and controlgroups w ere invited to the residential centre for 3- monthlycheck-ups. In addition, the experimental group follow ed a5-month w eight-loss maintenance programme. The mainte-nance programme started 1.5 months after initial treatmentbecause of the summer holidays.  During the maintenanceprogramme, there w ere w eekly contacts betw een a therapist(specialist in promoting | Control  Checkup every 3 months |  |
| defined by author  Intervention type | physical activity) and the patients,either by mail or phone. The patients recorded their physicaland sedentary activities in a diary (self-monitoring, self -control) and sent their diary to the therapist each w eek. Inturn, the therapist phoned them biw eekly to discuss briefly(5–10 min) their activity behaviour.  Lifestyle | Lifestyle |  |
| Intervention  length | 5 months | 5 months |  |
| Intensity as described by  authors | The administration (letters,incentive system, preparing phone calls) took about 20 minper 2 w eeks per patient. In the first 15 w eeks, patients w erecalled biw eekly, and during the last 6 w eeks, phone contactsw ere cut back to one  call every 3 w eeks. | Checkup every 3 months |  |
| Assigned  intensity | 5-25 hours | <5 hours |  |
| Provider types | Mental health | Usual care |  |
| Clinic setting | Multidisciplinary w eight management program, (post inpatient discharge) | Multidisciplinary w eight management program, (post  inpatient discharge) |  |
| Components | Nutrition counseling, activity counseling, other (incentives) | Usual care |  |

| Outcomes |  |  |  |  |  |
| --- | --- | --- | --- | --- | --- |
| Adjusted BMI Percent |  |  |  |  |  |
| Post (5 months) | | | | | |
|  | N | Mean | SD | p (w ithin group) | p (betw een groups) |
| Experimental | 10 |  | Trajectory: increase in OW during maintenance phase (p<0.05) | | NR |
| Control | 10 |  | Trajectory: increase in OW slow ed dow n during maintenance (NS) | | NR |

**Demol, S; Yackobovitch-Gavan, M; Shalitin, S; Nagelberg, N; Gillon-Keren, M; Phillip, M**

**Low-carbohydrate (low & high-fat) versus high-carbohydrate low-fat diets in the treatment of obesity in adolescents**

| Study  Identification |  |  |  |  |
| --- | --- | --- | --- | --- |
| Sponsorship  source | None listed. |  |  |  |
| Country | Israel |  |  |  |
| Methods | | | | |
| Design | Randomized controlled trial |  |  |  |
| Group | Parallel group |  |  |  |
| IRB | The study w as approved by the local Ethics Committee for Research in Humans of the Israel Ministry of Health. Writ-ten inf ormed consent w as obtained from  each participant and his or her legal guardian. | | | |
| Outcomes other than  BMI | Other obesity, glucose metabolism, lipids |  |  |  |
| Population | | | | |
| Inclusion criteria | The study sample consisted of 55 obese patients aged 12–18 years (mean 14.4±1.7) ref erred to the Obesity Clinicof the Institute for Endocrinology and Diabetes at Schneider Children’s Medical Center of Israel betw een January and March 2005. All patients w ere Tanner stage 4–5, and all had a body mass index (BMI)  greater than the 95th percentile for age and gender according to the grow th charts of the Cen-ters for Disease Control and Prevention. | | | |
| Exclusion criteria | Subjects w ith a chronic disease (such as diabetes, renal, heart or liver dis-eases, thyroid function disorder or diagnosed psychologicaldisorder), subjects  receiving w eight–loss-inducing medica-tion and subjects w ho had participated in another w eight–loss study or slimming diet w ithin 2 months prior to thepresent study w ere excluded. | | | |
| Group  differences | Randomized |  |  |  |
| Special  populations | None |  |  |  |
|  | Low carb/low fat | Low carb/high fat | High carb/low fat | Overall |
| N | 18 | 20 | 17 | 55 |
| Sex | 38.9% male | 50% male | 23.5% male | 38.2%  male |
| Age | 14 | 14.3 | 14.9 | NR |
| Race | NR | NR | NR | NR |
| BMI SDS | 3.4 | 3.1 | 3.3 | 3.3 |
| Interventions | |  |  |  |
|  | Low carb/low fat | Low carb/high fat | High carb/low fat |  |
| Intervention as described by authors | All participant received menus and detailed instructionaccording to their diet group. In order to increase the com-pliance to the diet regiment, once a month during the threemonths of intervention all participants received three  new different detailed menus according to their diet group.  Low -carbohydrate, low -fat, protein-rich diet con-taining 1200–1500 kcal a day: 60 g carbohydrates(up to 20%), 30% fats and 50% proteins. As part of theintervention, participants attended w eekly sessions w ith adietitian and a  psychologist. At the end of the intervention pe- riod (w eek 12), the participants w ere given new | All participant received menus and detailed instructionaccording to their diet group. In order to increase the com-pliance to the diet regiment, once a month during the threemonths of intervention all participants received three  new different detailed menus according to their diet group. Low -carbohydrate, high-fat diet containing1200–1500 kcal a day: 60 g carbohydrates (up to20%), 60% fats and 20% proteins. As part of theintervention, participants attended w eekly sessions w ith adietitian and a psychologist. At the end of the intervention pe- riod (w eek 12), the participants w ere given new  instructionsand menus for a high-carbohydrate | All participant received menus and detailed instructionaccording to their diet group. In order to increase the com-pliance to the diet regiment, once a month during the threemonths of intervention all participants received three  new different detailed menus according to their diet group. High-carbohydrate, low -fat diet containing 1200–1500 kcal a day: 50–60% carbohydrates, 30% fatsand 20% proteins. As part of theintervention, participants attended  w eekly sessions w ith adietitian and a psychologist. At the end of the intervention pe- riod (w eek 12), the participants w ere given new  instructionsand menus for a high-carbohydrate |  |

|  | instructionsand menus for a high-carbohydrate low -fat maintenance dietand scheduled for  follow -up visits every 3 months for thef ollow ing  9 months. | low -fat maintenance dietand scheduled for  follow -up visits every 3 months for thef ollow ing 9 months. | low -fat maintenance dietand scheduled for  follow -up visits every 3 months for thef ollow ing 9 months. |
| --- | --- | --- | --- |
| Intervention  type | Specific diet | Specific diet | Specific diet |
| Intervention length | 12 w eeks | 12 w eeks | 12 w eeks |
| Intensity as described by  authors | 12 w eekly sessions | 12 w eekly sessions | 12 w eekly sessions |
| Assigned  intensity | 5-25 hours | 5-25 hours | 5-25 hours |
| Provider types | Specialist, nutrition provider, mental health | Specialist, nutrition provider, mental health | Specialist, nutrition provider, mental health |
| Clinic setting | Multidisciplinary w eight management program | Multidisciplinary w eight management program | Multidisciplinary w eight management program |
| Components | Nutrition counseling, activity counseling | Nutrition counseling, activity counseling | Nutrition counseling, activity counseling |

| Outcomes |  |  |  |  |  |  |  |  |
| --- | --- | --- | --- | --- | --- | --- | --- | --- |
| BMI SDS |  |  |  |  |  |  |  |  |
| 12 w eeks | |  |  | 52 w eeks | |  |  |  |
|  | N | Mean | SE | p (across groups) | N | Mean | SE | p (across groups) |
| Low carb/low fat | 18 | 2.8 | 0.3 | NS | 18 | 2.7 | 0.3 | NS |
| Low carb/high fat | 17 | 2.7 | 0.3 |  | 17 | 2.7 | 0.4 |  |
| High carb/low fat | 20 | 2.9 | 0.3 |  | 20 | 2.5 | 0.3 |  |
| BMI | | | | | | | | |
| 12 w eeks | |  |  | 52 w eeks | |  |  |  |
|  | N | Mean | SE | p (across groups) | N | Mean | SE | p (across groups) |
| Low carb/low fat | 18 | 32.5 | 1.6 | NS | 18 | 32.4 | 1.6 | NS |
| Low carb/high fat | 17 | 31.7 | 1.6 |  | 17 | 32.6 | 1.7 |  |
| High carb/low fat | 20 | 32 | 1.5 |  | 20 | 31.1 | 1.6 |  |

**Ebbeling, Cb; Leidig, Mm; Sinclair, Kb; Hangen, Jp; Ludwig, Ds**

**A reduced-glycemic load diet in the treatment of adolescent obesity**

| Study  Identification |  |  |  |
| --- | --- | --- | --- |
| Sponsorship source | This study w as supported by grants 1R01DK59240 and1K01DK62237, from the National Insitute of Diabetes andDigestive Kidney Diseases (Bethesda, Md); the Charles H.Hood Foundation (Boston, Mass); pilot and feasibility projectgrant DK46200 from the Boston Obesity and Nutrition Re-search Center (Boston); and grant M01 RR02172 aw ardedby the National Institutes of Health (Bethesda) to supportthe General Clinical Research Center at Children’s Hospi-tal Boston, Boston. Nutrition bars w ere offered to sub-jects in the experimental (Balance Bar; kindly provided by KraftFoods, Inc, Northfield, Ill) and conventional  groups (NatureValley Granola Bar; General Mills, Inc, Minneapolis, Minn) foroccasional use as snacks. | | |
| Country | USA |  |  |
| Methods | | | |
| Design | Randomized controlled trial |  |  |
| Group | Parallel group |  |  |
| IRB | The protocol w as approved by the Institutional Review Boardat Children’s Hospital Boston. Written inf ormed consent w asobtained from subjects 18 years or  older and from the parentsof minors; assent w as obtained from minors. | | |
| Outcomes other  than BMI | Other obesity, glucose metabolism |  |  |
| Population | | | |
| Inclusion  criteria | Obese patients 13-21 years |  |  |
| Exclusion criteria | Allsubjects w ere free of major medical illness, as assessed bymeans of physical examination and screening laboratory tests(measurement of kidney and liver enzymes, thyrotropin, gly-cosylated hemoglobin, and fasting plasma glucose levels andurinalysis). | | |
| Group  differences | Randomized |  |  |
| Special  populations | Adolescents |  |  |
|  | Experimental (Reduced GL) | Conventional (Reduced Fat) | Overall |
| N | 7 | 7 | 14 |
| Sex | NR | NR | NR |
| Age | 16.9 | 15.3 | NR |
| Race | NR | NR | NR |
| BMI | 34.9 | 37.1 | NR |
| Interventions | |  |  |
|  | Experimental (Reduced GL) | Conventional (Reduced Fat) |  |
| Intervention as described by authors | The reduced-GL prescription emphasized selection of carbo- hydrate-containing foods (eg, nonstarchy vegetables, fruits, le- gumes, nuts, and dairy) that are characterized by a low to mod- erate GI.14Patients w ere instructed to balance consumption  ofcarbohydrates w ith protein and fat at every meal and snack.The prescription w as not energy restricted. Rather, subjects  w ereadvised to eat to satiety and to snack w hen hungry. The tar- geted proportion of energy from carbohydrate and fat w ere 45%to 50% and 30% to 35%, respectively, w ith the remainder  fromprotein. Social cognitive theory provided a conceptual  framew ork forthe educational and behavioral components of  treatment thatw as consistent betw een intervention groups. | The reduced-fat prescription w as based on current rec-ommendations for  w eight loss and diabetes prevention,25,26w ithemphasis on limiting dietary fat intake and increasing the in-take of grains, vegetables, and fruits. Meal plans  w ere de-signed to elicit a negative energy balance of 250 to 500 kcal/d. ubjects w ere counseled toobtain 55% to 60% of energy from carbohydrates, 25% to 30%from fat, and the remainder from protein. Social cognitive theory provided a conceptual framew ork forthe educational and behavioral components of treatment thatw as consistent betw een intervention groups. |  |
| Intervention  type | Specific diet | Specific diet |  |

| Intervention  length | 12 months | 12 months |
| --- | --- | --- |
| Intensity as  described by authors | 6-month intensive interven-tion (12 dietary counseling sessions) and a 6-month fol-low -up (2 dietary counseling sessions). | 6-month intensive interven-tion (12 dietary counseling sessions) and a 6- month fol-low -up (2 dietary counseling sessions). |
| Assigned  intensity | 5-25 hours | 5-25 hours |
| Provider types | Nutrition provider, mental health | Nutrition provider, mental health |
| Clinic setting | Research center | Research center |
| Components | Nutrition counseling, activity counseling, mental health | Nutrition counseling, activity counseling, mental health |

| Outcomes |  |  |  |  |
| --- | --- | --- | --- | --- |
| BMI |  |  |  |  |
| 12 months | | | | |
|  | N | Mean | SD | p (betw een groups) |
| Experimental (Reduced GL) | 7 | -1.3 | 0.7 | 0.02 |
| Conventional (Reduced Fat) | 7 | 0.7 | 0.5 |  |

**Fleischman, A; Hourigan, Se; Lyon, Hn; Landry, Mg; Reynolds, J; Steltz, Sk; Robinson, L; Keating, S; Feldman, Ha; Antonelli, Rc; Ludwig, Ds; Ebbeling, Cb Creating an integrated care model for childhood obesity: a randomized pilot study utilizing telehealth in a community primary care setting**

| Study Identification |  |  |  |
| --- | --- | --- | --- |
| Sponsorship  source | This study w as funded by New Balance Foundation. DSL w as supported by a career aw ard from the National Insti-tute of Diabetes and Digestive and  Kidney Diseases(DK082730). | | |
| Country | USA |  |  |
| Setting | - |  |  |
| Comments | - |  |  |
| Authors name | - |  |  |
| Institution | - |  |  |
| Email | - |  |  |
| Address | - |  |  |
| Methods |  |  |  |
| Design | Randomized controlled trial |  |  |
| Group | Crossover |  |  |
| IRB | The study w asapproved by the BCH Institutional Review Board. Parentsor guardians (hencef orth ref erred to asparents) providedw ritten inf ormed consent,  and patients provided w rittenassent. | | |
| Outcomes other  than BMI | Other obesity, behaviors |  |  |
| Population |  |  |  |
| Inclusion criteria | Inclusion criteria included age betw een 10 and 17 yearsand BMI≥95th percentile for gender and age | |  |
| Exclusion criteria | Exclusion criteria included know n obesity comorbidities requiring medical intervention (e.g. type 2 diabetes); inability to actively participate in treatment (e.g. physical or cognitive limitations); major medical illness; use of medication or supplement know n to af fect body w eight; unstable home environment (homeless, temporary living situation or lack of w orking phone or electricity), w hich w as deemed likely to impede participation in the study; diagnosed eating  disorder; untreated significant depression or anxiety; orself-reported suicidal ideation in the past month. | | |
| Group differences | Randomized |  |  |
| Special  populations | None |  |  |
|  | Group 1: PCP + specialist telehealth | Group 2: PCP only | Overall |
| N | 21 | 19 | 40 |
| Sex | NR | NR | 77.5%  female |
| Age | NR | NR | 14.3 |
| Race | NR | NR | 87.5%  w hite |
| BMI SDS | 2.11 | 2.1 | NR |
| Interventions | |  |  |
|  | Group 1: PCP + specialist telehealth | Group 2: PCP only |  |
| Intervention as described by authors | low -glycaemic load diet, For nutrition education and goal setting, PCPs utilized abooklet that w as developed for this pilot study to alignw ith the obesity specialist treatment, The patient and a parent had 12 tele-visits over 6 months,alternating betw een a dietitian and  psychology fellow | low -glycaemic load diet, For nutrition education and goal setting, PCPs utilized abooklet that w as developed for this pilot study to align w ith the obesity  specialist treatment |  |
| Intervention type | Lifestyle | Lifestyle |  |
| Intervention length | 6 months | 6 months |  |
| Intensity as described by authors | PCP every 3 months. 12 tele-visits over 6 months,alternating betw een a dietitian and psychology fellow . Dietitian visits w ere 1 h during a 6-w eek intensivephase (w eekly visits) and 30 min thereafter (less frequent fol-low -up visits). All psychologist visits w ere  1 h. | PCP every 3 months. |  |
| Assigned intensity | 5-25 hours | <5 hours |  |

| Provider type | Primary care, nutrition provider, mental health | Primary care |
| --- | --- | --- |
| Clinic setting | Primary care | Primary care |
| Components | Nutrition counseling, activity counseling, mental health, motivational interview ing, other  (telehealth) | Nutrition counseling, activity counseling |

| Outcomes |  |  |  |  |  |  |  |  |  |  |
| --- | --- | --- | --- | --- | --- | --- | --- | --- | --- | --- |
| BMI SDS |  |  |  |  |  |  |  |  |  |  |
|  | 3 months |  |  |  |  | 6 months |  |  |  |  |
|  | N | Mean | SE | p (w ithin group) | p (betw een groups) | N | Mean | SE | p (w ithin group) | p (betw een groups) |
| Group 1: PCP + specialist telehealth | 21 | -0.11 | 0.02 | <0.0001 | 0.049 | 21 | -0.11 | 0.03 | 0.0006 | 0.23 |
| Group 2: PCP only | 19 | -0.05 | 0.02 | 0.04 | - | 19 | -0.06 | 0.03 | 0.08 | - |
| BMI | | | | | | | | | | |
|  | 3 months |  |  |  |  | 6 months |  |  |  |  |
|  | N | Mean | SE | p (w ithin group) | p (betw een groups) | N | Mean | SE | p (w ithin group) | p (betw een groups) |
| Group 1: PCP + specialist telehealth | 21 | -1.1 | 0.2 | <0.0001 | 0.1 | 21 | -1.3 | 0.4 | 0.001 | 0.43 |
| Group 2: PCP only | 19 | -0.6 | 0.2 | 0.02 | - | 19 | -0.9 | 0.4 | 0.02 | - |

**Flodmark, Ce; Ohlsson, T; RydÃ©n, O; Sveger, T**

**Prevention of progression to severe obesity in a group of obese schoolchildren treated with family therapy**

| Study  Identification |  |  |  |  |
| --- | --- | --- | --- | --- |
| Sponsorship  source | This study w as supported by the Goljie Foundation, the Sw edish Medical Association, the Albert Pahlsson Foundation, the Sw edish Society of Medicine, the  Johanna Andersson Foundation, "Forenade Liv" Mutual Life Insurance Company Stockholm, and the Medical Faculty of the University of Lund. | | | |
| Country | Sw eden |  |  |  |
| Methods | | | | |
| Design | Randomized controlled trial |  |  |  |
| Group | Parallel group |  |  |  |
| IRB | The study design w as approved by the Research Ethics Committee of Lund University. | |  |  |
| Outcomes other  than BMI | Other obesity |  |  |  |
| Population | | | | |
| Inclusion criteria | BMI of 23 kg/m2. From children aged 10-11 screen for obesity at school. | |  |  |
| Exclusion criteria | None reported. |  |  |  |
| Group  differences | Randomized (tw o treatment groups--control not randomized). |  |  |  |
| Special  populations | None |  |  |  |
|  | Family therapy | Conventional treatment | Control | Overall |
| N | 24 | 19 | 50 | 93 |
| Sex | 54.2% female | 47.4% female | 62%  female | NR |
| Age | NR | NR | NR | NR |
| Race | NR | NR | NR | NR |
| BMI | 24.7 | 25.5 | 25.1 | NR |
| Interventions | |  |  |  |
|  | Family therapy | Conventional treatment | Control |  |
| Intervention as defined by author | Dietary counseling by a dietitian and regular visits to an experienced pediatrician w ith an interest in w eight problems. Prescribed diet of 1500-1700 calories, advised to reduce far to  30%. Also 6 family therapy sessions over 1 year. | Dietary counseling by a dietitian and regular visits to an experienced pediatrician w ith an interest in w eight problems. Prescribed diet of 1500-1700 calories, advised to reduce far to  30%. | Untreated |  |
| Intervention type | Lifestyle | Lifestyle | NA |  |
| Intervention  length | 14-18 months | 14-18 months | NA |  |
| Intensity as described by authors | Received dietary counseling, medical checkups by another pediatrician, 6 family therapy visits. | Ten families w ere seen by the dietitian once. The remaining families w ere satisfied w ith the counseling given by the  pediatrician, w hom they visited tw ice during the first 6 months  and then every 6 months during the rest of the | NA |  |
| Assigned  intensity | 5-25 hours | <5 hours | NA |  |
| Provider types | Primary care, nutrition provider, mental health | Primary care, nutrition provider | NA |  |
| Clinic setting | Primary care | Primary care | NA |  |
| Components | Nutrition counseling, activity counseling, mental health,  motivational interview ing | Nutrition counseling, activity counseling | Usual  care |  |

Outcomes

| BMI |  |  |  |  |  |  |  |  |
| --- | --- | --- | --- | --- | --- | --- | --- | --- |
| Post treatment | |  |  | One year follow -up | |  |  |  |
|  | N | Mean | SE | p (across groups) | N | Mean | SE | p (across groups) |
| Family therapy | 22 | 25 | 0.53 | 0.22 | 20 | 25.8 | 0.73 | 0.15 |
| Conventional treatment | 19 | 26.1 | 0.72 |  | 19 | 27.1 | 0.88 |  |
| Control | 50 |  |  |  | 48 | 27.9 | 0.61 |  |

**Fonseca**

**Effectiveness analysis of an internet-based intervention for overweight adolescents: next steps for researchers and clinicians**

| Study Identification |  |  |  |
| --- | --- | --- | --- |
| Sponsorship source | FundingThis w ork w as funded by Fundação para a Ciência e a Tecnologia (PTDC/ DTP- PIC/07 69/2012 Project). | |  |
| Country | Portugal |  |  |
| Methods |  |  |  |
| Design | Randomized controlled trial |  |  |
| Group | Parallel group |  |  |
| IRB | The study protocol w as approved by the EthicsCommittee of the Faculty of Medicine, University of Lisbon. Adolescents and their parents signed  an in-formed consent. | |  |
| Outcomes other than  BMI | Psychosocial |  |  |
| Population |  |  |  |
| Inclusion criteria | Participants w ere required to be overw eight,aged betw een 12 and 18, w illing to participate in the studyand have internet access at least once a w eek. | | |
| Exclusion criteria | Exclusioncriteria w ere the presence of severe psychopathology,pregnancy or having been proposed for bariatric surgery | |  |
| Group differences | Randomized |  |  |
| Special populations | None |  |  |
|  | Experimental Group | Control Group | Overa ll |
| N | 40 | 40 | 80 |
| Sex | 18/40 male | 21/40 male | 39/80  male |
| Age | 14.48 | 14.52 | NR |
| Race | NR | NR | NR |
| BMI | 30.95 | 31.42 | NR |
| Interventions | |  |  |
|  | Experimental Group | Control Group |  |
| Intervention as  defined by authors | In addition to the standard intervention, the experimentalgroup w as invited to access the e-therapeutic platform,w hich includes a set of resources, such as educationalresources (videos, brochures, menus, w eekly tips, accessto other links), self -monitoring (food, w eight and physicalactivity records), social support (chats, discussion forumsand personalized messages), interactive training andmotivational tools (personal goals planning, treatmentprogression registry, positive reinf orcement | The control group follow ed the clinical standard interven-tion, including individual appointments  w ith the paediatri-cian, dietician and exercise physiologist every 3 months. |  |
| Intervention type | Lifestyle | Lifestyle |  |
| Intervention length | 12 w eeks | 12 w eeks |  |
| Intensity as described by authors | individual appointments w ith the paediatri-cian, dietician and exercise physiologist every 3 months. + "case manager" | individual appointments w ith the paediatri-cian, dietician and exercise physiologist every 3  months. |  |
| Assigned intensity | <5 hours | <5 hours |  |
| Provider types | Primary care, nutrition provider, exercise provider | Primary care, nutrition provider,  exercise provider |  |
| Clinic setting | Multidisciplinary w eight management program | Multidisciplinary w eight  management program |  |
| Components | Nutrition counseling, activity counseling, motivational interview ing, other (e-therapeutic platform) | Nutrition counseling, activity counseling, motivational  interview ing |  |

| Outcomes |  |
| --- | --- |
| BMI |  |
|  | 12 w eeks |
|  | Text summary |
| Experimental  Group | a non significant main effect ofthe time on the scores of the variables; a non significantmain effect of the groups on the scores of the variables;and a non  significant interaction betw een the time andthe groups on the scores of the variables. |
| Control Group |  |

**Ford, Al; Bergh, C; SÃ¶dersten, P; Sabin, Ma; Hollinghurst, S; Hunt, Lp; Shield, Jp Treatment of childhood obesity by retraining eating behaviour: randomised controlled trial**

| Study  Identification |  |  |  |
| --- | --- | --- | --- |
| Sponsorship  source | This study w as funded by the BUPA Foundation. TheMandometer devices w ere loaned to the research team at no cost. | |  |
| Country | United Kingdom |  |  |
| Methods | | | |
| Design | Randomized controlled trial |  |  |
| Group | Parallel group |  |  |
| IRB | This study w as approved by United Bristol Hospitals Trust research ethics committee (ref 04/Q2006/9) and w ritten inf ormed consent w as given by all  participating families | |  |
| Outcomes  other than BMI | Other obesity, blood pressure, glucose metabolism, lipids, behaviors |  |  |
| Population | | | |
| Inclusion  criteria | Eligibility criteria w ere age 9-<18 at recruit-ment, BMI >95th centile, minimal or no learning dif -ficulties, no underlying medical problem such ashypothyroidism,  and no medication for insulin resis-tance. Participants w ere recruited from new patientsref erred to the obesity clinic. | | |
| Exclusion  criteria | No additional |  |  |
| Group  differences | Randomized |  |  |
| Special  populations | None |  |  |
|  | Standard Care | Mandometer | Overall |
| N | 52 | 54 | 106 |
| Sex | 56% female | 56% female | NR |
| Age | 12.5 | 12.7 | NR |
| Race | NR | NR | NR |
| BMI SDS | 3.21 | 3.29 | NR |
| Interventions | |  |  |
|  | Standard Care | Mandometer |  |
| Intervention as defined by authors | The clinic w as run by a multidisciplinary team com-posed of a clinician, a paediatric dietitian, and an exer-cise specialist, all of w hom consulted w ith each family.Emphasis w as placed on implementing changes toincrease levels of enjoyable physical activity tonational recommended levels (60 minutes of exercisea day) alongside a balanced diet, again based on theeatw ell plate. Families w ere encouraged to set theirow n dietary goals and targets, w ith practical adviceand guidance from the dietitian. In encouraging activ-ity the approach w as one of facilitation rather than pre-scription. Motivational interview ing techniques  w ereused to engage participants and families in the decisionmaking process for lifestyle changes, w hich is consis-tent w ith self determination principles and is morelikely to lead to responsibility for  long term change. Families w ere given further clinic appointments at three monthly intervals. | Those in the Mandometer group saw a research nurse,previously trained in Mandometer technology at the Mandometer Clinic, Stockholm,  Sw eden, initially once a w eek for sixw eeks, every second w eek for a further six w eeks, andonce every sixth w eek thereafter. The research  nurse tel-ephoned the patients to offer support and encourage-ment every  second w eek from w eek 12 onw ards. Dietary advice w as provided by a paediatric dietitiannot involved w ith the standard clinic, based on theFood Standards Agency“eatw ell plate”at w ww.eatw ell.gov.uk. A clin-ician met the participants every four months, emphasis-ing the need to change eating habits and improvephysical activity as advocated in the standard clinic. |  |
| Intervention  type | Lifestyle | Lifestyle |  |
| Intervention  length | 12 months | 12 months |  |

| Intensity as described by authors | At the first contact about an hour w as spent w ith each family. Families w ere given further clinic appointments at three monthly intervals. | initially once a w eek for six w eeks, every second w eek for a further six w eeks, and once every sixth w eek thereafter. The research nurse  telephoned the patients to offer support and encouragement every second  w eek from w eek 12 onw ards. Clinician every four months. |
| --- | --- | --- |
| Assigned  intensity | <5 hours | 5-25 hours |
| Provider types | Primary care, nutrition provider, exercise | Primary care, nutrition provider |
| Clinic setting | Multidisciplinary w eight management program | Multidisciplinary w eight management program |
| Components | Nutrition counseling, activity counseling | Nutrition counseling, activity counseling, other (Mandometer device) |

| Outcomes |  |  |  |  |  |
| --- | --- | --- | --- | --- | --- |
| BMI SDS (Per protocol) |  |  |  |  |  |
| 12 months | | | | | |
|  | N | Mean | CI (low er bound) | CI (upper bound) | p (across groups) |
| Standard Care | 46 | -0.14 | -0.04 | -0.23 | 0.13 |
| Mandometer | 45 | -0.4 | -0.3 | -0.51 |  |

**Garipağaoğlu 2009, M; Sahip, Y; Darendeliler, F; Akdikmen, O; Kopuz, S; Sut, N**

**Family-based group treatment versus individual treatment in the management of childhood obesity: randomized, prospective clinical trial**

| Study  Identification |  |  |  |
| --- | --- | --- | --- |
| Sponsorship  source | None reported |  |  |
| Country | Turkey |  |  |
| Methods | | | |
| Design | Randomized controlled trial |  |  |
| Group | Parallel group |  |  |
| IRB | The study w as approved by theinstitutional review board of the Hospital of Istanbul,Istanbul Medical Faculty, Istanbul University. Inf ormedconsent w as taken  from the children and families. | | |
| Outcomes other  than BMI | Behaviors |  |  |
| Population | | | |
| Inclusion criteria | Eighty obese self -ref erred children (51% female, 49%male), w hose ages varied from 6 to 14 years (10.1±2.7 years), and their parents | |  |
| Exclusion  criteria | Children w ith an organic cause of obesity andthose w ho received any medication w ere not included in thestudy. | |  |
| Group  differences | Randomized |  |  |
| Special populations | None |  |  |
|  | Individual treatment | Group treatment | Overall |
| N | 40 | 40 | 80 |
| Sex | 47.5% male | 50.0% male | NR |
| Age | 10.3 | 10.3 | NR |
| Race | NR | NR | NR |
| BMI SDS | 2.47 | 2.4 | 2.46 |
| Interventions | |  |  |
|  | Individual treatment | Group treatment |  |
| Intervention as described by authors | Children in the individual treatment (standard group)w ere invited to the dietetics department for dietary andbehavioral intervention program w ith their parents and w eremonitored for w eight control. Participants w ere trained inthe same intervals (seven sessions) w ith 30-min sessionsduring the 3-month program. Thirty-nine subjects completedthe 3-month program and 37 of them returned for follow -upvisits 1 year  later. | Children and parents in the grouptreatment (study group) w ere invited together for trainingsessions during the 3-month program. Forty subjectscompleted the program and 39 of them returned forfollow -up visits 1 year later. Training sessions w eredesigned so that there w ere four sub- groups each includingten children and parents. Ninety minutes w as allocated foreach training session and sessions w ere carried out  seventimes |  |
| Intervention  type | Lifestyle | Lifestyle |  |
| Intervention  length | 3 months | 3 months |  |
| Intensity as described by  authors | Participants w ere trained inthe same intervals (seven sessions) w ith 30- min sessionsduring the 3-month program. | This w as a3-month w eight control program for children that includedseven training sessions at 2-w eek intervals. Ninety minutes w as allocated  foreach training session and sessions w ere carried out seventimes. |  |
| Assigned  intensity | <5 hours | 5-25 hours |  |
| Provider types | Specialist, nutrition provider | Specialist, nutrition provider |  |
| Clinic setting | Multidisciplinary w eight management | Multidisciplinary w eight management |  |
| Components | Nutrition counseling, activity counseling | Nutrition counseling, activity counseling |  |

| Outcomes |  |  |  |  |  |  |  |  |  |  |
| --- | --- | --- | --- | --- | --- | --- | --- | --- | --- | --- |
| BMI SDS |  |  |  |  |  |  |  |  |  |  |
|  | 3 months |  |  |  | 12 months | |  |  |  |  |
|  | N | Mean | SD | p (w ithin group) | p (betw een groups) | N | Mean | SD | p (w ithin group) | p (betw een groups) |
| Individual treatment | 39 | 2.35 | 0.49 | 0 | 0.041 | 37 | 2.37 | 0.38 | 0.274 | 0.14 |
| Group treatment | 40 | 2.36 | 0.49 | 0 |  | 39 | 2.36 | 0.48 | 0 |  |
| BMI | | | | | | | | | | |
|  | 3 months |  |  |  | 12 months | |  |  |  |  |
|  | N | Mean | SD | p (w ithin group) | p (betw een groups) | N | Mean | SD | p (w ithin group) | p (betw een groups) |
| Individual treatment | 39 | 26.3 | 4.1 | 0 | 0.023 | 37 | 26.8 | 3.9 | 0.575 | 0.267 |
| Group treatment | 40 | 26.5 | 3.5 | 0 |  | 39 | 26.7 | 3.1 | 0 |  |

**Garnett, S. P.; Gow, M.; Ho, M.; Baur, L. A.; Noakes, M.; Woodhead, H. J.; Broderick, C. R.; Burrell, S.; Chisholm, K.; Halim, J.; De, S.; Steinbeck, K.; Srinivasan, S.; Ambler, G. R.; Kohn, M. R.; Cowell, C. T.**

**Optimal macronutrient content of the diet for adolescents with prediabetes; RESIST a randomised control trial**

| Study  Identification |  |  |  |
| --- | --- | --- | --- |
| Sponsorship  source | This w ork w as supported by the BUPA Foundation Australia Pty Limited (2008–2012), the Diabetes Australia Research Trust 2008, and the Heart Foundation,  Australia (Grant G08S3758) (2009–2010). | | |
| Country | Australia |  |  |
| Methods | | | |
| Design | Randomized Controlled Trial |  |  |
| Group | Parallel group |  |  |
| IRB | The study w as approved by The Children’s Hospital at West-mead Human Research Ethics Committee (07/CHW/12); Syd-ney South West Area Health, Western Zone (08/LPOOL/195); andSydneySouthWestAreaHealthService, RoyalPrinceAlfred Hospital (08/RPAH/455). Written inf ormed consent from par-  ents and assent from the young people w as sought prior to their enrollment in the study. | | |
| Outcomes  other than BMI | other obesity, glucose metabolism, lipids, blood pressure |  |  |
| Population | | | |
| Inclusion  criteria | Ten- to 17-year-old adolescents w ho w ere overw eight or obese, w ith either pre-type 2 diabetes as defined by the American Diabetes Association and/or clinical  features of insulin re-sistance w ere included in the study. | | |
| Exclusion criteria | Type 1 or type 2 diabetes, contraindications to metformin therapy, secondary causes of obesity, psychiatric disturbance, significant mental illness, inability to take part in physical ac-tivity, w eight loss medications or medications know n to cause w eight gain, and w eight greater than 120 kg. Adolescents taking  metformin prior to commencement of the study w ere required to have a 3-month w ashout period. | | |
| Group  differences | Randomized |  |  |
| Special  Population | None |  |  |
|  | Moderate-Carbohydrate Increased Protein Diet | High-carbohydrate, Low -Fat Diet | Overall |
| Age | 13.0 [10.1–16.5] | 13.2 [10.2–17.4] | NR |
| Sex | 34 girls (60.7%) | 32 girls (58.2%) | NR |
| Race | NR | NR | NR |
| BMI SDS | 2.39 +/- 0.25 | 2.33 +/-0.32 | NR |
| Interventions | |  |  |
|  | Moderate-Carbohydrate Increased Protein Diet | High-carbohydrate, Low -Fat Diet |  |
| Intervention as defined by author | Metformin (Diabex) w as provided at no cost to all participants for the duration of the study. The initial dose w as 250 mg tw ice a day. After the first 2 w eeks, this w as increased to a final dose of 500 mg tw ice daily.The intervention consisted of 3 phases: 1) phase 1 (0 to 3 months), intensive structured dietary intervention; 2) phase 2 (4–6 months), intensive exercise program plus ongoing dietary sup-port; and  3) phase 3 (7–12 months), maintenance. Diet 2 w as a moderate-carbohydrate, increased-protein diet, w hich is 40%–45% of total energy as carbohydrate (moderate glycemic load), 30% fat (10% saturated fat), and 25%–30% protein. Consistent w ith our clinical practice, both diets w ere prescriptive, and 2 different energy levels w ere prescribed, depending on age: 6000–7000 kJ (10–14 years old) or 7000–8000 kJ (15–17 years old). In brief, in phase I the participants and at least 1 parent/care giver attended 4 face-to-face meetings (baseline and 2, 6, and 12 w eeks) w ith the dietitian. In addition to the face to face contact, the dietitian also made contact w ith the participant using phone,  e-mail, or text message, depending on the pref erence of the par-ticipant at 4 and 9  w eeks. Food consistent w ith the prescribed diet plans and equating to approximately | Metformin (Diabex) w as provided at no cost to all participants for the duration of the study. The initial dose w as 250 mg  tw ice a day. After the first 2 w eeks, this w as increased to a final  dose of 500 mg tw ice daily.The intervention consisted of 3 phases: 1) phase 1 (0 to 3 months), intensive structured  dietary intervention; 2) phase 2 (4–6 months), intensive exercise program plus ongoing dietary support; and 3) phase 3 (7–12 months), maintenance. Diet 1 w as a high- carbohydrate, low -fat diet, w hich is 55%-60% of total energy as carbohydrate (moderate glycemic load), 30% fat (10% saturated fat), and 15% protein. Consis-tent w ith our clinical practice, both diets w ere prescriptive, and 2 different energy levels w ere prescribed, depending on age: 6000–7000 kJ (10–14 years old) or 7000–8000 kJ (15–17 years old). In  brief, in phase I the participants and at least 1 parent/care |  |

|  | 25% of the partici-pants energy requirements w as provided to the families. During phase II the dietitian gave nutritional support [phone, e-mail, or short message service (SMS)] to the participant every 4 w eeks, w ith a face-to-face visit at w eek 26.During phase II, all participants received a supervised exercise program for 45 minutes to 1 hour, tw ice a w eek for 12 w eeks in a commercial  gym,includingFitnessFirst,oralocalparkinthe geographic area in w hich they lived. Participants w ere given free access to the gyms. The exercise program consisted of a circuit training program w ith an age-appropriate mix of resistance exercises and aerobic stations conducted by a qualified fitness trainer, blinded to the treatment arm. In addition to the gym program, participants w ere encouraged to exercise at least once a w eek at home. | giver attended 4 face-to-face meetings (baseline and 2, 6, and 12 w eeks) w ith the dietitian. In addition to the face to face contact, the dietitian also made contact w ith the  participant using phone, e-mail, or text message, depending on the pref erence of the par-ticipant at 4 and 9 w eeks. Food consistent w ith the prescribed diet plans and equating to approximately 25% of the participants energy requirements w as provided to the families. During phase II the dietitian gave nutritional support [phone, e-mail, or short message service (SMS)] to the participant every 4 w eeks, w ith a face- to-face visit at w eek 26During phase II, all participants received a supervised exercise program for 45 minutes to 1 hour, tw ice a w eek for 12 w eeks in a commercial gym, includingFitness First, or a local park in the geographic area  in w hich they lived. Participants w ere given free access to the gyms. The exercise program consisted of a circuit training program w ith an age-appropriate mix of resistance exercises and aerobic stations conducted by a qualified fitness trainer, blinded to the treatment arm. In addition to the gym program, participants w ere encouraged to exercise at least once a  w eek at home. |
| --- | --- | --- |
| Intervention type | Specif ic Diet | Specif ic Diet |
| Intervention  length | 12 months | 12 months |
| Intensity as described by authors | In brief, in phase I the participants and at least 1 parent/care giver attended 4 face-to- face meetings (baseline and 2, 6, and 12 w eeks) w ith the dietitian. In addition to the  face to face contact, the dietitian also made contact w ith the participant using phone, e-mail, or text message, depending on the pref erence of the participant at 4 and 9  w eeks | In brief, in phase I the participants and at least 1 parent/care giver attended 4 face-to-face meetings (baseline and 2, 6, and 12 w eeks) w ith the dietitian. In addition to the face to  face contact, the dietitian also made contact w ith the  participant using phone, e-mail, or text message, depending on the pref erence of the participant at 4 and 9 w eeks |
| Assigned  intensity | <5 hours | <5 hours |
| Provider types | primary care (or study physician); nutrition provider, exercise | primary care (or study physician); nutrition provider, exercise |
| Clinic setting | research unit | research unit |
| Components | medication, prescription diet; nutrition counseling, activity counseling, activity training | medication, prescription diet; nutrition counseling, activity  counseling, activity training |

| Outcomes |  |  |  |  |  |  |  |  |  |  |  |  |
| --- | --- | --- | --- | --- | --- | --- | --- | --- | --- | --- | --- | --- |
| BMI 95th percentile |  |  |  |  |  |  |  |  |  |  |  |  |
|  | baseline |  |  |  | 3 month |  |  |  | 6 Month |  |  |  |
|  | N | Mean | SD | P Value | N | Mean | SD | P Value | N | Mean | SD | P Value |
| Moderate-Carbohydrate Increased Protein Diet | 56 | 133 | 19 | NA |  |  |  | 0.001 |  |  |  | 0.009 |
| High-carbohydrate, Low -Fat Diet | 55 | 132 | 23 | NA |  |  |  | 0.001 |  |  |  | 0.009 |

**Garnett, S. P.; Gow, M.; Ho, M.; Baur, L. A.; Noakes, M.; Woodhead, H. J.; Broderick, C. R.; Chisholm, K.; Briody, J.; De, S.; Steinbeck, K.; Srinivasan, S.; Ambler,**

**G. R.; Cowell, C. T.**

**Improved insulin sensitivity and body composition, irrespective of macronutrientintake, after a 12 month intervention in adolescents with pre-diabetes; RESIST a randomised control trial**

| Study  Identification |  |  |  |
| --- | --- | --- | --- |
| Sponsorship source | The project w as funded by BUPA Foundation Australia Pty Limited (2008 to 2012), Diabetes Australia Research Trust (DART) 2008 and Heart Foundation, Australia (#G08S3758) 2009 to 2010. SPG w as supported by a National Health and Medical Research Council Australian (NHMRC) Clinical Research Fellow ship  (#457225) 2007 to 2010 and an Early Career Research Fellow ship, Cancer Institute NSW 2011 to 2013. | | |
| Country | Australia |  |  |
| Methods | | | |
| Design | Randomized controlled trial |  |  |
| Group | Parallel group |  |  |
| IRB | This study w as conducted according to the guidelines laid dow n in the Declaration of Helsinki and w as approved by CHW Human Research Ethics Committee (07/CHW/12) and Sydney South West Area Health, Western Zone (08/LPOOL/195). Written informed consent from parents and assent from the adolescents w as  sought prior to enrolment. | | |
| Outcomes other than  BMI | BMI, glucose metabolism, lipids, blood pressure |  |  |
| Population | | | |
| Inclusion criteria | Ten to 17 year old adolescents w ho w ere overw eight or obese, as defined by the International Obesity TaskForce [14] w ith either pre type 2 diabetes [16] and/or clinical features of insulin resistance. As previously described clinical features of insulin resistance w ere defined as a fasting insulin (pmol/L)/glucose (mmol/L) ratio >20 w ith one or more of the follow ing: acanthosis nigricans, polycystic ovarian syndrome, hypertension, fasting HDL cholesterol <1.03 mmol/L or fasting  triglycerides ≥1.7 mmol/L [12]. | | |
| Exclusion  criteria | Diabetes, contraindications to metformin, secondary causes of obesity, psychiatric disturbance, significant mental illness, inability to take part in physical activity,  w eight loss medications or medications know n to cause w eight gain, and w eight >120 kg. | | |
| Group  differences | Randomized |  |  |
| Special  Population | None |  |  |
|  | Moderate Carbohydrate, Increased Protein | High Carbohydrate, Low fat | Overall |
| Sex | 34 (60.7%) girls; n=56 | 58.2% female | NR |
| Age | 13 (10.1 to 16.5] | 13.2 | NR |
| Race | NR | NR | NR |
| BMI SDS | 2.39 (0.25SD) | 2.33 | NR |
| N | 56 | 55 | 111 |
| Interventions | |  |  |
|  | Moderate Carbohydrate, Increased Protein | High Carbohydrate, Low fat |  |
| Intervention as defined by the author | Diet 2 w as a moderate-carbohydrate, increased-protein diet, w ith 40-45% of total energy as carbohydrate (moderate glycaemic load), 30% fat (≤10% saturated fat), 25-30% protein. The intervention consisted of three phases: I (0–3 months): Intensive dietary intervention II (4–6 months): Intensive exercise program plus dietary support III (7–12 months): Participants w ere encouraged to continue w ith their diet/exercise regimens andmetformin. | Diet 1 w as a high-carbohydrate diet, w ith 55-60% of total energy as carbohydrate (moderate glycaemic load), 30% fat (≤10% saturated fat) and 15% protein.The intervention consisted of three phases: I (0–3 months): Intensive dietary intervention II (4–6 months): Intensive exercise program plus dietary support III (7–12 months): Participants  w ere encouraged to continue w ith their diet/exercise regimens and  metformin. |  |
| Intervention  type | Specif ic diet, lifestyle | Specif ic diet, lifestyle |  |

| Intervention  length | 12 months | 12 months |
| --- | --- | --- |
| Intensity as described by authors | (Description of exercise described) Exercise Phase I Standardised physical activity advice, consistent w ith recommendations for adolescents [17] w as delivered by study dieticians. Phase II Participants received, free of charge, a supervised exercise program, 45–60 minutes, tw ice/w eek for 12 w eeks in a commercial gym, including Fitness First, or a local park in the geographic area in w hich they lived. The program w as designed to be of moderate- tovigorous intensity and consisted of circuit training w ith an age-appropriate mix of resistance and aerobic stations, conducted byqualified fitness trainers, blinded to treatment arm. Participants w ere also encouraged to exercise at least once a w eek at home | (Description of exercise described) Exercise Phase I Standardised physical activity advice, consistent w ith recommendations for adolescents [17] w as delivered by study dieticians. Phase II Participants received, free of charge, a supervised exercise program, 45–60 minutes, tw ice/w eek for 12 w eeks in a commercial gym, including Fitness First, or a local park in the geographic area in w hich they lived. The program w as designed to be of moderate-tovigorous intensity and consisted of circuit training w ith an age-appropriate mix of resistance and aerobic stations, conducted by qualified fitness trainers, blinded to treatment arm.  Participants w ere also encouraged to exercise at least once a w eek at home |
| Assigned  intensity | 26-51 hours | 26-51 hours |
| Provider  type | Primary care, nutrition provider, exercise | Primary care, nutrition provider, exercise |
| Clinic setting | primary care; research center | primary care; research center |
| Components | Nutrition counselling, activity training, Medication | Nutrition counselling, activity training, Medication |

| Outcomes |  |  |  |  |  |  |  |  |  |  |
| --- | --- | --- | --- | --- | --- | --- | --- | --- | --- | --- |
| BMI 95th percentile |  |  |  |  |  |  |  |  |  |  |
|  | 6  months |  |  |  |  | 12  months |  |  |  |  |
|  | N | Mean | CI (low er  bound) | CI (upper  bound) | p (across  groups) | N | Mean | CI (low er  bound) | CI (upper  bound) | p (across  groups) |
| Moderate Carbohydrate,  Increased Protein | 49 |  |  |  | NS | 39 |  |  |  | NS |
| High Carbohydrate, Low fat | 49 |  |  |  |  | 46 |  |  |  |  |

**Gourlan, M; Sarrazin, P; Trouilloud, D**

**Motivational interviewing as a way to promote physical activity in obese adolescents: a randomised-controlled trial using self-determination theory as an explanatory framework**

| Study Identification |  |  |  |
| --- | --- | --- | --- |
| Sponsorship source | This research has benefited by the help of the French National Institute of Prevention and HealthEducation (INPES). | |  |
| Country | France |  |  |
| Methods |  |  |  |
| Design | Randomized controlled trial |  |  |
| Group | Parallel group |  |  |
| IRB | The study w as approved by the researchethics committee of the specific academic institution. Parents provided inf ormedconsent, and adolescents  provided w ritten assent for study participation | |  |
| Outcomes other  than BMI | Behaviors, psychosocial |  |  |
| Population |  |  |  |
| Inclusion criteria | Children ref erred to the w eight loss program by their GP. 11 and 18 years old (Mean age = 13, SD = 1.66), had a BMI over the nineti-eth age and gender  specific percentiles | | |
| Exclusion criteria | unstable or uncontrollable diseases |  |  |
| Group differences | Randomized |  |  |
| Special populations | None |  |  |
|  | SWLP + MI | SWLP | Overall |
| N | 28 | 34 | 62 |
| Sex | NR | NR | 41%  female |
| Age | NR | NR | 13 |
| Race | NR | NR | NR |
| BMI | 29.56 | 29.59 | 29.57 |
| Interventions | |  |  |
|  | SWLP + MI | SWLP |  |
| Intervention as described by  authors | In the MI condition, participants received the same intervention by the same healthcare provider plus six MI phone sessions w ith a PA trained  counsellorof 20 min over a six-month period. | In the SWLP group, participants received an intervention consisting of tw o individ-ual face-to-face sessions of 30 min at the hospital w ith  a healthcare provider over athree-month period. |  |
| Intervention type | Lifestyle | Lifestyle |  |
| Intervention length | 6 months | 6 months |  |
| Intensity as described by  authors | tw o individ-ual face-to-face sessions of 30 min plus 6 20-min MI phone sessions | tw o individ-ual face-to-face sessions of 30 min |  |
| Assigned intensity | <5 hours | <5 hours |  |
| Provider types | Primary care, exercise | Primary care |  |
| Clinic setting | Weight management program | Weight management program |  |
| Components | Nutrition counseling, activity counseling, motivational interview ing | Nutrition counseling, activity counseling |  |

Outcomes

BMI

|  | 3 months |  |  |  | 6 months |  |  |  |
| --- | --- | --- | --- | --- | --- | --- | --- | --- |
|  | N | Mean | SD | p (betw een groups) | N | Mean | SD | p (betw een groups) |
| SWLP + MI | 26 | 28.42 | 4.63 | <0.05 | 26 | 27.95 | 4.53 | 0.17 |
| SWLP | 28 | 29.9 | 5.98 |  | 28 | 29.71 | 5.96 |  |

**Grieken, A; Veldhuis, L; Renders, Cm; Borsboom, Gj; Wouden, Jc; Hirasing, Ra; Raat, H Population-Based Childhood Overweight Prevention: outcomes of the 'Be Active, Eat Right' Study**

| Study  Identification |  |  |  |
| --- | --- | --- | --- |
| Sponsorship  source | This study is funded by a grant from the major funding body ZonMw , the Netherlands Organization for Health Research and Development (50-50110-98-355). | | |
| Country | The Netherlands |  |  |
| Methods | | | |
| Design | Cluster randomized controlled trial |  |  |
| Group | Parallel group |  |  |
| IRB | The Medical Ethics Committee of the Erasmus UniversityMedical Center Rotterdam approved the study protocol (ref erencenumber MEC-2007-163). | |  |
| Outcomes other  than BMI | Other obesity |  |  |
| Population | | | |
| Inclusion criteria | 5 year old children attending w ell visit w ith overw eight (not obesity) |  |  |
| Exclusion  criteria | Obesity |  |  |
| Group  differences | Cluster randomized; baseline difference in age w ith control condition significantly older than intervention (p=0.016). | |  |
| Special  populations | None |  |  |
|  | Intervention | Control | Overall |
| N | 349 | 288 | 637 |
| Sex | 38.7% male | 37.5% male | 38.1%  male |
| Age | 5.72 | 5.8 | 5.76 |
| Race | % Dutch 75.8 | % Dutch 80.6 | NR |
| BMI | 18.16 | 18.1 | 18.13 |
| Interventions | |  |  |
|  | Intervention | Control |  |
| Intervention as described by authors | The prevention protocol offeredparents inf ormation regarding overw eight prevention and healthylifestyle choices by using a motivational interview ing approach, ifneeded, to motivate the parents to change behavior. The content of an additional counseling session depended onthe stage of behavioral change of the parents [19,21,22]. TheYHC prof essionals assessed the level of motivation of the parentduring the w ell-child visit. The YHC prof essionals needed tocreate  aw areness of the child’s w eight status among the parents.Inf ormation about overw eight and associated consequences couldbe given to parents. Moreover, motivational interview ing tech-niques could be used to further motivate parents to  change healthbehavior. | When a child w ho w as overw eight (not obese) w as detectedw hen visiting a YHC team allocated to the control condition,parents w ere also inf ormed about the overw eight of their child butusual care w as given. Usual care consisted of general inf ormationabout a healthy lifestyle during the w ell- child visit. |  |
| Intervention type | Lifestyle | Lifestyle |  |
| Intervention  length | 2 years | 2 years |  |
| Intensity as described by authors | Theprevention protocol w as initiated during the w ell-child visit and inaddition up to three structured healthy lifestyle counseling sessionsto promote overw eight- prevention behaviors could be offered,approximately 3, 6 and 12 months after the  w ell-child visit. | Well visit only |  |
| Assigned  intensity | <5 hours | <5 hours |  |

| Provider types | Primary care | Primary care |
| --- | --- | --- |
| Clinic setting | Primary care | Primary care, SBHCs |
| Components | Nutrition counseling, activity counseling, motivational interview ing | Usual care |

| Outcomes |  |  |  |  |
| --- | --- | --- | --- | --- |
| BMI |  |  |  |  |
|  | 2 years |  |  |  |
|  | N | Mean | SD | p (betw een groups) |
| Intervention | 277 | 1.37 | 1.53 | NS |
| Control | 230 | 1.44 | 1.71 |  |

**Hills, A. P.; Parker, A. W.**

**Obesity management via diet and exercise intervention**

| Study  Identification |  |  |  |
| --- | --- | --- | --- |
| Sponsorship  source | Not reported |  |  |
| Country | Australia |  |  |
| Methods | | | |
| Design | Randomized controlled trial |  |  |
| Group | Parallel group |  |  |
| IRB | Procedures employed w ere in accordance w ith the National Health and Medical Research Council's standards for  experimentation w ith human subjects. | | |
| Outcomes  other than BMI | Other obesity |  |  |
| Population | | | |
| Inclusion criteria | Subjects w ere recruited to an obesity clinic via ref erral from medical practitioners and personalized letters distributed to local primary schools. All subjects w ere classif ied as prepubertal based on the absence of pubic hair in the males and the absence of menarche in the females (Tanner 1962). Verif ication of the above w as provided by the family doctor of each subject in the course of standard medical clearance to embark upon a Obesity management 41 graded exercise programme. Al l obes e subject s w er e abov e th e 95t h percentil e w eigh t fo r ag e (Nationa l Healt h an d Medica l Researc h Counci l 1975 ) an d ha d a Bod y Mas s Inde x (BMI ) tha t exceede d 25. A third group of 15 normal w eight subjects w as  chosen as a normal w eight ref erence group. The latter children w ere matched w ith the obese group in terms of age , school and socioeconomic status. | | |
| Exclusion  criteria | Not provided |  |  |
| Group  differences | Randomly assigned |  |  |
| Special  Populations | NOne |  |  |
|  | Experimental | Control | Normal Weight |
| N Enrolled | 10 | 10 | 15 |
| Sex | NR | NR | NR |
| Age in years | NR | NR | NR |
| Race | NR | NR | NR |
| BMI | 51.6 (2.68 SE) | 50.2 (2.81) | 30.7 (1.81) |
| Interventions | | | |
|  | Experimental | Control | Normal Weight |

Intervention as defined by author

Exercise programme :The exercise programme involved a w eekly supervised session at the clinic and the remainder of the programme w as home based. Fifty minutes of each supervised session involved cardiorespiratory tasks follow ing an appropriate w arm up and preparatory activities. A major aim of the programme w as to provide subjects w ith a w ide variety of movement experiences designed to improve skill level. This involved approximately 20 minutes of gymnastics, dance and motor skill activities on a rotational basis, w ith the remainder of the time incorporating games and games training. Home programme: In

All subjects w ere provided w ith energy balance record sheets to determine food intake and dietary practices. In addition, obese experimental and control subjects had individual consultations w ith a dietitian prior to the commencement of the exercise programme. An initial meeting focused on the results of the completed details described above and revolved around the current dietary practices of subject and family alike. Nutrition education w as the focus, highlighting food selection, appropriate dietary goals and some basic behavioural aspects such as eating slow ly and self -monitoring. Mid-w ay through the exercise programme a second

All subjects w ere provided w ith energy balance record sheets to determine food intake and dietary practices. In addition, obese experimental and control subjects had individual consultations w ith a dietitian prior to the commencement of the exercise programme. An initial meeting focused on the results of the completed details described above and revolved around the current dietary practices of subject and family alike. Nutrition education w as the focus, highlighting food selection, appropriate dietary goals and some basic behavioural aspects such as eating slow ly and self -monitoring. Mid-w ay through the exercise programme a second

|  | addition to the supervised exercise period, experimental subjects w ere encouraged to participate in an aerobic activity of approximately 20 minutes duration, three to four times per w eek.  Record sheets w ere designed enabling parents to oversee involvement of children and verify completion of the home programme.  Reinf orcement, practice of exercises and liaison  w ith parents enabled adherence to the programme. Suggestions regarding the importance of increased habitual physical activity emphasized the necessity for increased daily activity levels and discouragement of sedentary pursuits such as television view ing. Dietary inf ormation: All subjects w ere provided w ith energy balance record sheets to determine food intake and dietary practices. In addition, obese experimental and control subjects had individual consultations w ith a dietitian prior to the commencement of the exercise programme. An initial meeting focused on the results of the completed details described above and revolved around the current dietary practices of subject and family alike. Nutrition education w as the focus, highlighting food selection, appropriate dietary goals and some basic behavioural aspects such as eating slow ly and self -monitoring. Mid-w ay through the exercise programme a second consultation reinf orced and supplemented the  former. The same nutrition inf ormation w as presented to the normal w eight subjects in an attempt to provide all participants w ith as similar as  possible dietary advice. | consultation reinf orced and supplemented the former. The same nutrition inf ormation w as presented to the normal w eight subjects in an  attempt to provide all participants w ith as similar as possible dietary advice. | consultation reinf orced and supplemented the former. The same nutrition inf ormation w as presented to the normal w eight subjects in an  attempt to provide all participants w ith as similar as possible dietary advice. |
| --- | --- | --- | --- |
| Intervention  type (choose one) | Lifestyle | Lifestyle | Lifestyle |
| Intervention  length | 16 w eeks | 16 w eeks | 16 w eek |
| Intensity as described by authors | The exercise programme involved a w eekly supervised session at the clinic and the remainder of the programme w as home based. Fifty minutes of each supervised session involved cardiorespiratory tasks follow ing an appropriate  w arm up and preparatory activities. In addition to the supervised exercise period, experimental subjects w ere encouraged to participate in an aerobic activity of approximately 20 minutes duration, three to four times per w eek | NA | NA |
| Assigned  Intensity | 5-25 hours | <5 hours | <5 |
| Provider type  (select all) | primary care, exercise, nutrition provider | nutrition provider | NR (nutrition ed given but provider not reported ) |

| Clinic setting  (choose one— probably) | Multidisciplinary w eight management clinic | Multidisciplinary w eight management | school |
| --- | --- | --- | --- |
| Components (choose all) | activity training, nutrition counseling, activity counseling, parent engagement (invited to attend,  instructed to monitor home PA) | Nutritional counseling | Nutritional counseling |

| Outcomes |  |  |  |  |
| --- | --- | --- | --- | --- |
| BMI |  |  |  |  |
|  | Bef ore |  | After |  |
|  | Mea | SE | Mea | SE |
| Experimental | 51.6 | 2.68 | 46.1 | 2.46 |
| Control | 50.2 | 2.81 | 52.8 | 3.02 |
| Normal Weight | 30.7 | 1.81 | 30.6 | 1.75 |

**Hoffman, J.; Frerichs, L.; Story, M.; Jones, J.; Gaskin, K.; Apple, A.; Skinner, A.; Armstrong, S.**

**An Integrated Clinic-Community Partnership for Child Obesity Treatment: A Randomized Pilot Trial**

| Study  Identification |  |  |  |
| --- | --- | --- | --- |
| Sponsorship  source | Supported by the Early Career Aw ard from the Obesity Society, aw arded to Dr Frerichs | |  |
| Country | USA |  |  |
| Methods | | | |
| Design | Randomized controlled trial |  |  |
| Group | Parallel group |  |  |
| IRB | The institutional review boards from Duke University (Pro00066366) and the University of North Carolina at Chapel Hill (15-1867) approved the study protocol. | | |
| Outcomes other  than BMI | Other obesity, blood pressure, lipids, glucose metabolism, other (CV fitness) | |  |
| Population | | | |
| Inclusion  criteria | Participants included a consecutive sample of patients aged 5 to 11 w ith a BMI ≥95th percentile, ref erred by their primary care provider to the Healthy  Lifestyles clinic, along w ith each child’s adult primary caregiver (“parent”) aged 18 or older | | |
| Exclusion  criteria | We excluded children w ith a medical cause for obesity (hypothyroidism, Cushing’s syndrome, etc), those w ho lived more than 30 miles from the clinic or  planned to move out of the area, and those w hose parents could not speak or read English or Spanish. | | |
| Group  differences | No differences |  |  |
| Special Population | None |  |  |
|  | Healthy Lifestyles Only | Healthy Lifestyles + Bull City Fit | Overall |
| N Enrolled | 47 | 50 | 97 |
| Sex | male 53% / female 47% | male 42 %/female 58 % | male 47% /  female 53% |
| Age in years | 9.2 (1.8) | 9.1 (1.9) | 9.1 (1.9) |
| Race | White 15%/AA 59%/Hispanic 27%/other 0% | White 9%/AA 45%/Hispanic 40%/other 6 % | White 11% /AA  51%/Hispanic 34%/Other 3% |
| Interventions | |  |  |
|  | Healthy Lifestyles Only | Healthy Lifestyles + Bull City Fit |  |
| Intervention as defined by author | Control participants received standard clinical care at Healthy  Lifestyles, in addition to receiving promotional materials about the local parks and recreation department. Patients w ith obesity and their families meet monthly w ith multidisciplinary team (medical, nutrition, physical therapy, and mental health) to set and monitor  lifestyle behavioral goals and manage health conditions. We invited  control participants to participate in the intervention at the end of the study. | Intervention participants received standard clinical care at Healthy Lifestyles in addition to receiving free, unlimited access to Bull City Fit community-based programming. |  |
| Intervention  type (choose one) | Lifestyle | lifestyle |  |
| Intervention length | 6 months | 6 months |  |
| Intensity as described by authors | Patients w ith obesity and their families meet monthly w ith multidisciplinary team (medical, nutrition, physical therapy, and mental health). Average of 4.4 hrs (range: 2-9, SD: 1.6) | Patients w ith obesity and their families meet monthly w ith multidisciplinary team (medical, nutrition, physical therapy, and mental health). Average 11.7 hrs (range: 2-67.8, SD: 15.3). Bull  City Fit is open 6 days per w eek, 6pm to 8pm on w eekdays and 1 |  |

|  |  | pm to 3 pmon w eekends (Supplemental Table 4). All members of the immediate household may participate. Activities include structured games and team-building sports (6 days/w eek), cooking classes (1 day/w eek), sw imming lessons (2 days/w eek), and peer support (1 day/w eek). Trained staff supervise and facilitate all  activities. (Average 11.7 hours, but w e base on "possible" hours.) |
| --- | --- | --- |
| Assigned Intensity | 5-25 hrs (because designed for 6 monthly sessions) | 52+ hours |
| Provider type  (select all) | primary care, nutrition, mental health, exercise | primary care, nutrition, mental health, exercise |
| Clinic setting (choose one—  probably) | pediatric w eight management program | pediatric w eight management program |
| Components  (choose all) | nutrition and activity counseling, motivational interview ing | motivational interview ing, nutrition counseling, nutrition training,  activity counseling, activity training |

| Outcomes |  |  |  |  |  |  |
| --- | --- | --- | --- | --- | --- | --- |
| BMIz |  |  |  |  |  |  |
| Change from Baseline to 3  mo | |  |  | Change from Baseline to 6  mo |  |  |
|  | Change in BMI | 95% CI Low er  Bounds | 95% CI Upper  Bounds | Change in BMI | 95% CI Low er  Bounds | 95% CI Upper  Bounds |
| Healthy Lifestyles Only | 0.04 | -0.05 | 0.06 | 0.04 | -0.06 | 0.13 |
| Healthy Lifestyles + Bull  City Fit | 0.03 | -0.05 | 0.06 | 0.01 | -0.06 | 0.13 |
| BMI 95th percentile | | | | | | |
| Change from Baseline to 3  mo | |  |  | Change from Baseline to 6  mo |  |  |
|  | Change in BMI | 95% CI Low er  Bounds | 95% CI Upper  Bounds | Change in BMI | 95% CI Low er  Bounds | 95% CI Upper  Bounds |
| Healthy Lifestyles Only | -0.66 | -13.3 | 12 | 0.24 | -13.3 | 3.1 |
| Healthy Lifestyles + Bull City Fit | -0.002 | -13.3 | 12 | 5.49 | -13.5 | 3.1 |

**Hofsteenge, Gh; Chinapaw, Mj; Delemarre-van, de Waal Ha; Weijs, Pj**

**Long-term effect of the Go4it group treatment for obese adolescents: a randomised controlled trial**

| Study  Identification |  |  |  |
| --- | --- | --- | --- |
| Sponsorship  source | This study is funded by The Netherlands Organisation for Health Research and Development (ZONMW) (no: 50-50110-98-255). | |  |
| Country | The Netherlands |  |  |
| Methods | | | |
| Design | Randomized controlled trial |  |  |
| Group | Parallel group |  |  |
| IRB | The medical ethical committee for human studies of the VU University Medical Center Amsterdam approved the protocol. Adolescents as w ell as their parents  gave w ritten inf ormed consent | | |
| Outcomes other  than BMI | BMI, other obesity, glucose metabolism, blood pressure, lipids |  |  |
| Population | | | |
| Inclusion criteria | Subjects w ere eligible w hen they met the follow ing inclusion criteria: 1) age betw een 11 and 18 years; 2) overw eight or obesity according to the definition of  Cole et al. | | |
| Exclusion criteria | Exclusion criteria w ere: not Dutch-speaking, obesity as a result of a know n syndrome or organic cause (hypothyroidism), mental retardation, physical  limitations and diagnosed type 2 diabetes mellitus | | |
| Group  differences | Randomized, none |  |  |
| Speical  population | None |  |  |
|  | Intervention group | Control Group | Overall |
| Sex | female 38 (53%) | female 30 (58%) | female 68  (55%) |
| Age | 14.5 | 14.4 | NR |
| Race (ethnicity) | w estern 36 (50%), non w estern 35 (~49%) | w estern 18 (35%), non w estern 35 (65%) | w estern 54  (44%), non  w estern 68  (55%) |
| BMI SDS | 2.93 | 2.93 | NR |
| Interventions | |  |  |
|  | Intervention group | Control Group |  |
| Interention type as defined by author | Go4it is a multidisciplinary group treatment for obese adolescents based on the programs of Braet et al.,9 Epstein et al.,7 and the educational materials of the Dutch Obesity Intervention in Teenagers (DOiT).14 During 7 sessions (duration 90 min) w ith an interval of 2e3 w eeks the adolescents received education on healthy dietary, sedentary and physical activity behaviour. The group sizew as 8e12 adolescents. They received cognitive behavioural therapy in w hich they learned how to improve their lifestyle and how to maintain energy balance. Go4it w as carried out in an outpatient clinic involving a dietician, paediatrician/endocrinologist and psychologist. In addition, tw o separate parallel sessions for parents w ere organised corresponding w ith the first and fourth session of the adolescents.  Four booster group sessions w ere scheduled 6, 14, 26, and 36 w eeks after the 3-months intervention period, in order to encourage the adolescents to maintain or further improve their energy balance behaviour and discuss problems and questions. Throughout the  program the adolescents remained in the same peer group. | The control group received the regular care in the Netherlands (valid for year 2006e2009), consisting of ref erral to a dietician in the home care setting. Adolescents had to make this appointment themselves. |  |
| Intervention type | Lifestyle | Lifestyle |  |

| Intervention  length | 3 months | 3 months |
| --- | --- | --- |
| Intensity as described by authors | During 7 sessions (duration 90 min) w ith an intervalof 2e3 w eeks the adolescents received education on healthy dietary, sedentary and physical activity behaviour.Tw o parent sessions Four booster group sessions w ere scheduled 6, 14, 26,and 36 w eeks after the 3-months  intervention period, | Ref erral to a dietitian in home setting Number of visits unspecified |
| Assigned intensity | 5-25 hours | <5 hours |
| Provider type | primary care, nutrition provider, mental health, subspecialist | Dietician |
| Clinic setting | Speciality Clinic | Specialty Clinic |
| Components | Nutrition counseling,activity counseling, separate parent counseling , cognitive behavioral  therapy | Diet counseling |

| Outcomes |  |  |  |  |  |  |  |  |  |  |  |  |  |  |
| --- | --- | --- | --- | --- | --- | --- | --- | --- | --- | --- | --- | --- | --- | --- |
| BMI |  |  |  |  |  |  |  |  |  |  |  |  |  |  |
|  | 6  months |  |  |  |  |  |  | 18  months |  |  |  |  |  |  |
|  | n | Mean | SD | Betw een group  difference | Betw een group 95%  CI upper | Betw een group 95%  CI low er | betw een group p  value | n | Mean | SD | Betw een group  difference | Betw een group 95%  CI upper | Betw een group 95%  CI low er | betw een group p  value |
| Intervention  group | 71 | 32.8 | 4.7 | -0.76 | -1.74 | 0.22 |  | 71 | 34.2 | 6.1 | -0.97 | -2.02 | 0.09 |  |
| Control  Group | 51 | 34.2 | 5.3 |  |  |  |  | 51 | 34.9 | 5.6 |  |  |  |  |
| BMI SDS | | | | | | | | | | | | | | |
|  | 6  months |  |  |  |  |  |  | 18  months |  |  |  |  |  |  |
|  | n | Mean | SD | Betw een group  difference | Betw een  group 95% CI upper | Betw een  group 95% CI low er | betw een  group p value | n | Mean | SD | Betw een group  difference | Betw een  group 95% CI upper | Betw een  group 95% CI low er | betw een  group p value |
| Intervention  group | 71 | 2.81 | 0.5 | -0.1 | -0.23 | 0.04 |  | 71 | 2.86 | 0.7 | -0.16 | -0.3 | -0.02 | 0.05 |
| Control  Group | 51 | 2.95 | 0.55 |  |  |  |  | 51 | 2.96 | 0.6 |  |  |  |  |

**Hughes, Ar; Stewart, L; Chapple, J; McColl, Jh; Donaldson, Md; Kelnar, Cj; Zabihollah, M; Ahmed, F; Reilly, Jj**

**Randomized, controlled trial of a best-practice individualized behavioral program for treatment of childhood overweight: scottish Childhood Overweight Treatment Trial (SCOTT)**

| Study  Identification |  |  |  |
| --- | --- | --- | --- |
| Sponsorship  source | This w ork w as supported by a grant from the ScottishExecutive Health Department. | |  |
| Country | United Kingdom |  |  |
| Methods | | | |
| Design | Randomized controlled trial |  |  |
| Group | Parallel group |  |  |
| IRB | Ethical approval w as obtained from the research ethicscommittee at each participating site. Written inf ormedconsent w as obtained from all children and  their par-ents/guardians. | | |
| Outcomes other  than BMI | Other obesity, behavior, psychosocial |  |  |
| Population | | | |
| Inclusion criteria | Overw eight children (BMI98th centilerelative to United Kingdom 1990 ref erence data, usuallyref erred to as obesity in the United Kingdom)3,4w how ere aged 5 to 11 years and attending a standard ele-mentary school and had at least 1 parent w ho perceivedthe child’s w eight as a problem and w as w illing to  makelifestyle changes. | | |
| Exclusion  criteria | We excluded children w ho had anunderlying medical cause for their overw eight or seriouscomorbidity that required urgent treatment or w ho had received  treatment for overw eight in the past year. | | |
| Group  differences | Randomized |  |  |
| Special Populations | None |  |  |
|  | Standard Care/Control | Intervention | Overall |
| N | 65 | 69 | 134 |
| Sex | 45% male | 43% male | NR |
| Age | 8.5 | 9.1 | NR |
| Race | NR | NR | NR |
| BMI SDS | 3.3 | 3.2 | NR |
| Interventions | |  |  |
|  | Standard Care/Control | Intervention |  |
| Intervention as defined by authors | Children w ho w ere randomly assigned to the controlgroup received typical dietetic care currently are offeredf or overw eight individuals by hospital and communitydietetic services in Scotland. | Briefly,this is a practical, best-practice behavioral program de-livered by experienced pediatric dietitians w ho aretrained in behavior change counseling8,12on a 1-to-1basis (ie, 1 dietitian saw 1 family). Children w ere encouraged to alter their diet by usinga  modified traffic-light approach [reduce intake of foodshigh in fat and sugar (red), increase intake of fruit andvegetables (green)]5,16increase their physical activity,17and restrict their sedentary behavior (television view ingand playing computer/video games) to no more than  2hours per day or the equivalent of 14 hours per w eek asis w idely recommended.4,6 |  |
| Intervention type | Lifestyle | Lifestyle |  |
| Intervention  length | 6 months | 6 months |  |
| Intensity as described by  authors | This involved 3 to 4 outpa-tient appointments delivered by pediatric dietitians dur-ing 6 to 10  months w ith a total patient contact time of 1.5 hours. | The program con-sisted of 8 appointments (7 outpatient visits and 1 homevisit) during 26 w eeks w ith a total patient contact timeof5 hours. |  |
| Assigned intensity | <5 hours | 5-25 hours |  |
| Provider type | Primary care, nutrition provider | Primary care, nutrition provider |  |

| Clinic setting | Primary care | Primary care |
| --- | --- | --- |
| Components | Nutrition counseling, activity counseling,  motivational interview ing | Nutrition counseling, activity counseling |

| Outcomes |  |  |  |  |  |  |  |  |  |  |  |  |
| --- | --- | --- | --- | --- | --- | --- | --- | --- | --- | --- | --- | --- |
| BMI SDS |  |  |  |  |  |  |  |  |  |  |  |  |
|  | 6  months |  |  |  |  |  | 12  months |  |  |  |  |  |
|  | N | Median | IQR (low er  bound) | IQR (upper  bound) | p (w ithin  group) | p (betw een  groups) | N | Median | IQR (low er  bound) | IQR (upper  bound) | p (w ithin  group) | p (betw een  groups) |
| Standard  Care/Control | 65 | -0.06 | -0.22 | 0.05 | <0.05 | NS | 65 | -0.19 | -0.31 | 0.02 | <0.05 | NS |
| Intervention | 69 | -0.1 | -0.24 | -0.02 | <0.05 |  | 69 | -0.07 | -0.32 | 0.04 | <0.05 |  |

**Hystad, Ht; Steinsbekk, S; Ã˜degÃ¥rd, R; WichstrÃ¸m, L; Gudbrandsen, Oa**

**A randomised study on the effectiveness of therapist-led v. self-help parental intervention for treating childhood obesity**

| Study  Identification |  | |  | |  | |
| --- | --- | --- | --- | --- | --- | --- |
| Sponsorship  source | The present study w as supported by the Liaison Committee for Central Norw ay Regional Health Authority; the National Council of Mental Health/Health and  Rehabilitation, NTNU; St Olav University Hospital; the Bergen Medical Research Foundation and the Meltzer Foundation. | | | | | |
| Country | Norw ay | |  | |  | |
| Methods | | | | | | |
| Design | Randomized controlled trial | |  | |  | |
| Group | Parallel group | |  | |  | |
| IRB | The present study w as conducted according to the guidelines laid dow n in the Declaration of Helsinki, and all procedures involving patients w ere approved by  the Regional Ethical Committee for Medical Research. Written inf ormed consent w as obtained from all parents. | | | | | |
| Outcomes other  than BMI | other obesity, behaviors (detailed dietary and energy intake) | |  | |  | |
| Population | | | | | | |
| Inclusion criteria | The inclusion criteria w ere as follow s: age 7–12 years; BMI z-scores >=2; participation of at least one parent; the ability to participate in a group setting. | | | | | |
| Exclusion  criteria | Families w ere excluded if the obese child w as mentally retarded, if there w as an organic cause of obesity or if the child used medication that may interfere w ith  grow th or w eight control. | | | | | |
| Group  differences | randomized | |  | |  | |
| Special Populations | None | |  | |  | |
|  | Therapist -led group | | Self-help group | | Overall | |
| N Enrolled | 39 | | 44 | | 83 | |
| Sex | Male, 23; Female, | 24 | Male, 27; Female, | 25 | Male, 39;  Female, 44 | |
| Age in years | 9.9 (1.5SD) | | 10.5 (1.9SD) | | 10.2 (1.7SD) | |
| Race | NR | | NR | | All but 2 w ere  Caucasian. | |
| BMI z-score | 3.00 (0.51) | | 3.00 (0.36) | | 3.00 | (0.43) |
| BMI | 28.4 (4.5) | | 28.7 (3.5) | | 28.6 | (4.0) |
| Interventions | | |  | |  | |
|  | Therapist -led group | | Self-help group | |  | |
| Intervention as defined by author | The focus of both the TLG and SHG interventions w as to establish regular mealtimes, increase the intake of fruits, vegetables and other high-fibre food, reduce the intake of added sugar and fat, conduct at least 1 h of moderate physical activity per d and reduce sedentary behaviour gradually, tow ards a maximum of 2 h per day | | The focus of both the TLG and SHG interventions w as to establish regular mealtimes, increase the intake of fruits, vegetables and other high-fibre food, reduce the intake of added sugar and fat, conduct at least 1 h of moderate physical activity per d and reduce sedentary behaviour gradually, tow ards a maximum of 2 h per d. The SHG w ere based on the principle of mutual help, derived from the participants’ ow n experiences and know ledge. A health prof essional attended the tw o first and the last meeting to organise the group and facilitate group rules, but did not offer any education or guidance regarding  how to reduce adiposity. | |  | |
| Intervention type (choose  one) | Lifestyle | | Lifestyle | |  | |
| Intervention  length | 24 months | | 24 months | |  | |

| Intensity as described by authors | The TLG, SHG and children’s groups met simultaneously every second w eek for ten sessions during the first 6 months. During this 6- month period, each family also met monthly for individual counselling. Over the remaining 18 months of the 24-month intervention, the groups met five times at the hospital, and four individual family counselling sessions w ere conducted. Each of the fifteen group  sessions lasted 2 h, w hile each of the ten individual family counselling sessions lasted 30 min. | The TLG, SHG and children’s groups met simultaneously every second w eek for ten sessions during the first 6 months. During this 6- month period, each family also met monthly for individual counselling. Over the remaining 18 months of the 24-month intervention, the groups met five times at the hospital, and four individual family counselling sessions w ere conducted. Each of the fifteen group  sessions lasted 2 h, w hile each of the ten individual family counselling sessions lasted 30 min. |
| --- | --- | --- |
| Assigned  Intensity | 26-51 hours | 26-51 hours |
| Provider type  (select all) | Psychologists, pediatricians, clinical dietitians and physiotherapists | Health prof essional |
| Clinic setting (choose one—  probably) | Multidisciplinary w eight management | Multidisciplinary w eight management program |
| Components  (choose all) | mental health, nutrition counseling; activity counseling | nutrition counseling; activity counseling; parent peer support; mental  health |

| Outcomes |  |  |  |  |  |  |
| --- | --- | --- | --- | --- | --- | --- |
| BMI z-score |  |  |  |  |  |  |
|  | Baseline |  | 6 Months |  | 2 years |  |
|  | Mean | SD | Mean | SD | Mean | SD |
| Therapist -led group | 3 | 0.51 | 2.78 | 0.56 | 2.82 | 0.59 |
| Self-help group | 3 | 0.36 | 2.81 | 0.44 | 2.83 | 0.51 |
| Body Fat % | | | | | | |
|  | Baseline |  | 6 Months |  | 2 years |  |
|  | Mean | SD | Mean | SD | Mean | SD |
| Therapist -led group | 40.4 | 3.8 | 35.7 | 5.6 | 35.6 | 6.3 |
| Self-help group | 40.6 | 4 | 36.2 | 5.6 | 35.6 | 6.4 |

**Kalavainen**

**Clinical efficacy of group-based treatment for childhood obesity compared with routinely given individual counseling**

| Study Identification |  |  |  |
| --- | --- | --- | --- |
| Sponsorship source | This w ork w as supported in part by grants from KuopioUniversity Hospital, the Scientific Foundation of FinnishAssociation of Academic Agronomists, Finnish CulturalFoundation of Northern Savo, Juho Vainio Foundation,Ministry of Social Affairs and Health and Social  InsuranceInstitution. | | |
| Country | Finland |  |  |
| Methods |  |  |  |
| Design | Randomized controlled trial |  |  |
| Group | Parallel group |  |  |
| IRB | Inf ormed consent w as obtained from the parents, and the study w as approved by the Ethics Committee of Kuopio University and  University Hospital. | |  |
| Outcomes other than  BMI | None |  |  |
| Population |  |  |  |
| Inclusion criteria | Families w ith an obese 7–9-year-old child attendingprimary school w ere inf ormed about the study by schoolnurses and by new spaper  articles. The inclusion criterion w asthe presence of w eight for height from 120 to 200%, | | |
| Exclusion criteria | Exclusion criteria w ere a disease or a medication causingobesity, obvious movement disturbance, major mentalproblems in either children or  parents or a family memberparticipating in an alternative w eight management program | | |
| Group differences | Randomized |  |  |
|  | Routine treatment | Group treatment | Overa ll |
| N | 35 | 35 | 70 |
| Sex | 34% male | 46% male | 28  males |
| Age | 8 | 8.1 | 8.1 |
| Race | NR | NR | NR |
| BMI SDS | 2.5 (0.6) | 2.6 (0.6) | NR |
| Interventions | |  |  |
|  | Routine treatment | Group treatment |  |
| Intervention as described by authors | Routine program w as modified fromcurrent counseling practice for obese children in schoolhealth care in Finland. The program  w as standardized,and all school nurses w ere instructed by the researcher(MPK). The program consisted of booklets for families andtw o individual appointments for each child by schoolnurses. | The program focused on pro-moting a healthy lifestyle and w ell-being of obese childreninstead of w eight management. Group treatment included includedthe same components for example, promoting healthy diet,increasing physical activity and decreasing sedentary life-style w ith the help of behavioral therapy, as used in manyearlier intervention studies.11The recommended mealpattern and quality of the diet w ere in line w ith recommen-dations given for Finnish families.18The parents  w eretargeted as the main agents of change, and they w ereresponsible for  inducing changes at home. Most lifestylechanges w ere intended for the entire family. Overw eightparents w ho desired to lose w eight w ere encouraged. |  |
| Intervention type | Lifestyle | Lifestyle |  |
| Intervention Length | 6 months | 6 months |  |
| Intensity as described by authors | Tw o appointments. Theappointments of 30 min in duration w ere held at the end ofthe fall and spring  terms. | The group program consisted of 15 sessions of 90 min in duration held separately for parents and children, except one joint session of making healthy snacks |  |
| Assigned intensity | <5 hours | 5-25 hours |  |
| Provider types | Primary care (school nurse) | Dietician, Other- Researcher |  |
| Clinic setting | School health center | School health center, research |  |
| Components | Nutrition counseling, activity counseling | Nutrition counseling, activity counseling, nutrition training, activity training |  |

| Outcomes |  |  |  |  |  |  |  |  |  |  |
| --- | --- | --- | --- | --- | --- | --- | --- | --- | --- | --- |
| BMI SDS |  |  |  |  |  |  |  |  |  |  |
|  | 6  months |  |  |  |  | 12 months (6 mo  F/U) |  |  |  |  |
|  | N | Mea  n | CI (low er  bound) | CI (upper  bound) | p (across  groups) | N | Mea  n | CI (low er  bound) | CI (upper  bound) | p (across  groups) |
| Routine  treatment | 35 | -0.2 | -0.3 | -0.1 | 0.022 | 35 | -0.1 | -0.2 | 0 | 0.081 |
| Group treatment | 35 | -0.3 | -0.4 | -0.3 |  | 34 | -0.2 | -0.3 | -0.1 |  |

**Kalavainen, M; Korppi, M; Nuutinen, O**

**Long-term efficacy of group-based treatment for childhood obesity compared with routinely given individual counselling**

| Study  Identification |  |  |  |
| --- | --- | --- | --- |
| Sponsorship  source | This w ork w as supported in part by grants from Kuopio University Hospital, the Scientific Foundation of Finnish Association of Academic Agronomists, Finnish  Cultural Foundation of Northern Savo, Juho Vainio Foundation, Ministry of Social Affairs and Health and Social Insurance Institution. | | |
| Country | Finland |  |  |
| Methods | | | |
| Design | Randomized controlled trial |  |  |
| Group | Parallel group |  |  |
| IRB | The study w as approved by the Ethics Committee of Kuopio University and University Hospital. Inf ormedconsent w as obtained from the parents. | |  |
| Outcome other  than BMI | Other obesity |  |  |
| Population | | | |
| Inclusion criteria | 7-9 year old obese children |  |  |
| Exclusion criteria | The exclusion criteria w ere a disease or a medication causing obesity, obvious movement disturbance, major mental problems in either children or parents or  a family member participating in an alternative w eight management program | | |
| Group  differences | Randomized |  |  |
| Special  Populations | None |  |  |
|  | Routine | Group | Overall |
| N Enrolled | 35 | 35 | 70 |
| Sex | Boys, 12 (34%); Girl, 23 (66%) | Boys, 16 (46%); Girl, 19 (54%) | 60%  female |
| Age in years | 8.0* (0.8) | 8.1* (0.9) | 8.1 |
| Race | NR | NR | NR |
| BMI | 22.9 (2.5) | 23.4 (2.6) | 23.2 |
| BMI-SDS | 2.5 (0.6) | 2.6 (0.6) | 2.6 |
| Interventions | |  |  |
|  | Routine | Group |  |
| Intervention as defined by author | The program consisted of booklets for families and tw o individual appointments for each child by school nurses. The booklets contained inf ormation about w eight he same components for example, promoting healthy diet, increasing physical activity and decreasing sedentary  lifestyle w ith the help of behavioral therapy, as used in many earlier  intervention studies | The program focused on promoting a healthy lifestyle and w ell-being of obese children instead of w eight management. Group treatment included the same components for example, promoting healthy diet, increasing physical activity and decreasing sedentary lifestyle w ith the help of behavioral therapy, as used in many earlier intervention studies |  |
| Intervention type  (choose one) | Lifestyle | Lifestyle |  |
| Intervention  length | 6 months | 6 months |  |
| Intensity as described by  authors | Tw o appointments | 15 sessions of 90 min in duration |  |
| Assigned  Intensity | <5 hours | 5-25 hours |  |
| Provider type  (select all) | Clinical nutrition, researcher | Primary care |  |

| Clinic setting  (choose one— probably) | SBHC | Primary care |
| --- | --- | --- |
| Components  (choose all) | Nutrition counseling, activity counseling | Nutrition counseling, activity counseling |

| Outcomes |  |  |  |  |  |  |  |  |  |  |  |  |
| --- | --- | --- | --- | --- | --- | --- | --- | --- | --- | --- | --- | --- |
| Change in  BMI |  |  |  |  |  |  |  |  |  |  |  |  |
|  | Post-  intervention |  |  |  | Tw o-year  follow -up |  |  |  | Three-year  follow -up |  |  |  |
|  | Mean | SD | 95%CI low er bound | 95%CI upper bound | Mean | SD | 95%CI low er bound | 95%CI upper bound | Mean | SD | 95%CI low er bound | 95%CI upper bound |
| Routine | 0 | 1.1 | -0.4 | 0.3 | 1.5 | 1.7 | 1 | 2.1 | 2.3 | 2.7 | 1.4 | 3.2 |
| Group | -0.8 | 1 | -1.1 | -0.5 | 1.3 | 1.5 | 0.8 | 1.9 | 2.1 | 1.9 | 1.4 | 2.7 |
| BMI-SDS | | | | | | | | | | | | |
|  | Post-  intervention |  |  |  | Tw o-year  follow -up |  |  |  | Three-year  follow -up |  |  |  |
|  | Mean | SD | 95%CI low er  bound | 95%CI upper  bound | Mean | SD | 95%CI low er  bound | 95%CI upper  bound | Mean | SD | 95%CI low er  bound | 95%CI upper  bound |
| Routine | -0.2 | 0.3 | -0.3 | -0.1 | -0.2 | 0.4 | -0.3 | -0.1 | -0.3 | 0.6 | -0.5 | -0.1 |
| Group | -0.3 | 0.3 | -0.4 | -0.3 | -0.2 | 0.3 | -0.4 | -0.1 | -0.3 | 0.4 | -0.5 | -0.2 |

**Kokkvoll, A.; Grimsgaard, S.; Odegaard, R.; Flaegstad, T.; Njolstad, I.**

**Single versus multiple-family intervention in childhood overweight--Finnmark Activity School: a randomised trial**

| Study  Identification |  |  |  |
| --- | --- | --- | --- |
| Sponsorship source | The trial has been supported by Finnmark Hospital Trust, NorthernNorw ay Regional Health Authority, Norw egian Foundation for Health andRehabilitation and The Norw egian Directorate of Health. Contributions have alsobeen made by the University of Tromsø, the Ministry of Health and Care Services,SpareBank 1 Nord-  Norge and Odd Berg Fund | | |
| Country | Norw ay |  |  |
| Methods | | | |
| Design | Randomized controlled trial |  |  |
| Group | Parallel group |  |  |
| IRB | The Regional Committee for Medical and Health Research Ethicsapproved the study | |  |
| Outcomes other than  BMI | Other obesity |  |  |
| Population | | | |
| Inclusion  criteria | Inclusion criteria w ere age 6–12 years and BMI corresponding toadult BMI≥27.5 kg/m2. | |  |
| Exclusion  criteria | Exclusion criteriaw ere diseases incompatible w ith ordinary physical activity and psy-chosocial disorders incompatible w ith group interaction | |  |
| Group  differences | No differences |  |  |
| Special  Populations | None |  |  |
|  | SIFI | MUFI | Overall |
| N enrolled | 46 | 45 | 91 |
| Sex | female 22/ male 24 | Female=27; Male=18 | NR |
| Age in years | 10.5+-1.7 | 10.1±1.7 | NR |
| Race | NR | NR | NR |
| BMISDS | 2.81+-0.60 | 2.76+-0.58 | NR |
| Interventions | |  |  |
|  | SIFI | MUFI |  |
| Intervention as defined by author | Families allocated to SIFI met at the hospital outpatient clinic.The children underw ent baseline anthropometric measurements,follow ed by 30-min counselling by a paediatric study nurse. Subsequently, a paediatric consultant performed a clinical inter-view and examination  (30 min) and outlined definite aimstow ards the next consultation. All  families met w ith a nutrition-ist after 1–2 months. They w ere follow ed up by a public healthnurse in their ow n municipality at 1, 2, 5, 8, 10, 15 and18 months from baseline, and at the hospital by a paediatricnurse and a paediatric consultant at 3,12, 24 and 36 months. | Families allocated to MUFI underw ent anthropometric measure-ments and individual counselling identical to those of the SIFI programme. Additional elements w ere: (1) a 3-day inpatient programme at the Paediatric Department focusing on physical activity and healthy food, (2) group sessions w ith other families and a multidisciplinary hospital team (paediatric and psychiatric nurse, paediatric consultant, nutritionist, physiotherapist, coach and clinical educationalist), (3) municipality follow -up including individual (30 min) and group w ise counselling (1 h) w ith a public health nurse, (4) group- based physical activities tw ice w eekly (each session lasting 1 h, organised by  coach and by parents, respectively), (5) family participation in a 4-day camp after 4–6 months. |  |
| Intervention type (choose  one) | Lifestyle | Lifestyle |  |
| Intensity as  described by authors | Defined in table as 8 h in first 12 months; 30-min initial counseling' 30 min interview /examination/aims; clinic visits at 1, 2, 5, 8, 10, 15, and 18 | Defined in table as 36 hrs in first 12 months plus 38 hrs of organized physical  activity in first 12 months; discussed in methods as same as SIFI plus 72 hours inpatient; group sessions not specified duration/frequency; 30-60 min |  |

|  | months w ith public health nurse; consults at 3, 12, 24, 26 months w ith  pediatric nurse/consultant | counseling not specified duration/frequency; tw ice/w eek PA sessions not  specific total duration; 4-day camp not specified duration |
| --- | --- | --- |
| Assigned  Intensity | 5-25 hours | >= 52 hours |
| Provider  type (select all) | primary care, nutrition provider | primary care, nutrition provider, exercise, mental health, psychosocial support |
| Clinic setting (choose one—  probably) | Multidisciplinary w eight management program | Inpatient, Multidisciplinary w eight management program |
| Components  (choose all) | nutrition counseling (unclear w hat the other components w ere) | nutrition counseling, activity counseling, activity training, motivaitonal  interview ing |

| Outcomes |  |  |  |  |  |  |  |  |  |  |  |  |  |  |
| --- | --- | --- | --- | --- | --- | --- | --- | --- | --- | --- | --- | --- | --- | --- |
| BMI SDS |  |  |  |  |  |  |  |  |  |  |  |  |  |  |
|  | 3  months |  |  |  |  |  |  | 12  months |  |  |  |  |  |  |
|  | Mean Change | 95% CI  low er bound1 | 95% CI  uper bound2 | Betw een group  difference  Coefficient | 95% CI  low er bound | 95% CI  uper bound | P  value | Mean Change | 95% CI  low er bound1 | 95% CI  uper bound2 | Betw een group  difference  Coefficient | 95% CI  low er bound | 95% CI  uper bound | P  value |
| SIFI | -0.05 | -0.12 | 0.01 | -0.08 | -0.17 | 0.01 | 0.097 | -0.07 | -0.14 | -0.01 | -0.09 | -0.18 | 0.01 | 0.068 |
| MUFI | -0.13 | -0.2 | -0.07 | -0.08 | -0.17 | 0.01 |  | -0.16 | -0.23 | -0.09 | -0.09 | 0.18 | 0.01 |  |

**Kokkvoll, A.; Grimsgaard, S.; Steinsbekk, S.; Flaegstad, T.; Njolstad, I.**

**Health in overweight children: 2-year follow-up of Finnmark Activity School--a randomised trial**

| Study  Identification |  |  |  |
| --- | --- | --- | --- |
| Sponsorship source | The trial has been supported by Finnmark Hospital Trust, NorthernNorw ay Regional Health Authority, Norw egian Foundation for Health andRehabilitation and The Norw egian Directorate of Health. Contributions have alsobeen made by the University of Tromsø, the Ministry of Health and Care  Services,SpareBank 1 Nord-Norge and Odd Berg Fund | | |
| Country | Norw ay |  |  |
| Methods | | | |
| Design | Randomized controlled trial |  |  |
| Group | Parallel group |  |  |
| IRB | Regional Committee for Medical and Health Research Ethics,Region North. The families gave w ritten inf ormed consent signed by parents and allchildren≥12  years | | |
| Outcomes other  than BMI | Other obesity |  |  |
| Population | | | |
| Inclusion criteria | Overw eight and obese children aged 6–12 yearsw ith BMI corresponding to>/=27.5 kg/m2in adults (≥the 98centile according to the UK ref erence | |  |
| Exclusion criteria | No additional |  |  |
| Group differences | Randomized |  |  |
| Special  Populations | None |  |  |
|  | Single Family | Multiple Family | Overall |
| N | 46 | 45 | 91 |
| Sex | 48% female | 60% female | NR |
| Age | 10.5 | 10.1 | NR |
| Race | NR | NR | NR |
| BMI SDS | 2.81 | 2.76 | NR |
| Interventions | |  |  |
|  | Single Family | Multiple Family |  |
| Intervention as defined by author | SIFI comprised clinical examination and individual counselling by paediatric nurse, paediatric consultant, nutritionist at the  hospital and follow -up by a local public health nurse. | MUFI comprised a 3-day inpatient programme at the hospital w ith other families and a multidisciplinary team, individual and group-based follow -up visits in their  hometow n, w eekly group- based physical activity and a 4-day family camp |  |
| Intervention type | Lifestyle | Lifestyle |  |
| Intervention length | 24 months | 24 months |  |
| Intensity as described by  authors | 8 hours of contact first 12 months | 36 hours of contact first 12 months; plus 38 hours of organized physical activity |  |
| Assigned intensity | 5-25 hours | 52+ hours |  |
| Provider types | Primary care, nutrition provider, project nurse | Primary care, nutrition provider, exercise provider |  |
| Clinic setting | Multidisciplinary w eight management clinic | Inpatient, multidisciplinary w eight management program |  |
| Components | Nutrition counseling, activity counseling, motivational  interview ing | Nutrition counseling, activity counseling, activity training, motivational  interview ing |  |

| Outcomes |  |  |  |  |  |  |  |  |  |  |
| --- | --- | --- | --- | --- | --- | --- | --- | --- | --- | --- |
| BMI SDS |  |  |  |  |  |  |  |  |  |  |
|  | 12 months |  |  |  | 24 months | |  |  |  |  |
|  | N | Mean | CI (low er bound) | CI (upper bound) | p (across groups) | N | Mean | CI (low er bound) | CI (upper bound) | p (across groups) |
| Single Family | 46 | -0.07 | -0.16 | 0.01 | 0.188 | 46 | -0.08 | -0.17 | 0.01 | 0.046 |

| Multiple Family | 45 | -0.15 | -0.23 | -0.07 |  | 45 | -0.2 | -0.29 | -0.12 |  |
| --- | --- | --- | --- | --- | --- | --- | --- | --- | --- | --- |
| BMI |  |  |  |  |  |  |  |  |  |  |
|  | 12 months |  |  |  | 24 months | |  |  |  |  |
|  | N | Mean | CI (low er bound) | CI (upper bound) | p (across groups) | N | Mean | CI (low er bound) | CI (upper bound) | p (across groups) |
| Single Family | 46 | 0.78 | 0.21 | 1.35 | 0.308 | 46 | 2.02 | 1.44 | 2.6 | 0.075 |
| Multiple Family | 45 | 0.37 | -0.18 | 0.91 |  | 45 | 1.29 | 0.74 | 1.84 |  |

**Kong, As; Sussman, Al; Yahne, C; Skipper, Bj; Burge, Mr; Davis, Sm**

**School-based health center intervention improves body mass index in overweight and obese adolescents**

| Study  Identification |  |  |  |  |
| --- | --- | --- | --- | --- |
| Sponsorship source | This project w as supported in part or in w hole w ith federal funds from the follow ing: National Heart, Lung and Blood Institute of the National Institutes of Health Grant no. R21 HL092533, “Adolescents Committed to Improvement of Nutrition and Physical Activity (ACTION)” and Department of Health and Human Services/National Institutes of Health - National Center for Research Resources Grant no. 8UL1TR000041, and “The University of New Mexico Clinical and  Translational Science Center, CTSC.” | | | |
| Country | USA |  |  |  |
| Methods | | | | |
| Design | Cluster randomized controlled trial |  |  |  |
| Group | Parallel group |  |  |  |
| IRB | The protocol w as approved by the University of New Mexico (UNM) Human Research Protections Office and the Research, Development, and Accountability  Department of both high schools. | | | |
| Outcomes  other than BMI | Other obesity, behaviors, blood pressure, lipids, glucose metabolism |  |  |  |
| Population | | | | |
| Inclusion  criteria | Students w ere eligible to participate if they w ere in the 9th to 11th grades and had a BMI ≥85th percentile. | |  |  |
| Exclusion criteria | Exclusion criteria included BMI ≥ 40 kg/m 2 ,previous diagnosis of diabetes, blood pressure in the range of stage 2hypertension[ 12 ], antipsychotic or  corticosteroid medica- tions, or if the adolescent w as not ambulatory. Withdraw al conditions included anorexia nervosa, bulimia nervosa, psy- chosis, suicidal ideation, hospitalization, and pregnancy. | | | |
| Group  differences | No differences |  |  |  |
| Special  Populations | groups w ere 100% R/E minority. |  |  |  |
|  | ACTION | Standard Care Group | Betw een Group  Difference | Overall |
| N Enrolled | 28 | 23 |  | 51 |
| Sex | 17 (61% female) | 13 (57%) female |  | NR |
| Age in years | 15 (1SD) | 14.6 (0.7SD) |  | NR |
| Race | 14% Asian; 75% Hispanic; 0% Native American; 11% multiple | 4% Asian; 61% Hispanic; 13% Native American; 22% multiple |  | NR |
| BMI percentile | 94.5 (4.1SD) | 94.4(4.6SD) |  | NR |
| Interventions | | | | |
|  | ACTION | Standard Care Group | Betw een Group  Difference |  |
| Intervention as defined by author | ACTION, based on the Transtheoretical Model [13], included three primary components: (1) clinical encounters w ith the SBHC clinician every tw o to three w eeks for a total of eight visits over  one academic year, (2) use of motivational interview ing (MI) [14, 15], and (3) obesity risk reduction strategies from a toolkit that w as cocreated w ith a community advisory group made of overw eight and obese adolescents and their parents. The toolkit included a DVD and print materials to provide a “menu of options” during  clinical encounters (Table 1). | The clinician w as trained on the study protocol and procedural materials prior to initiating the trial. Participants in the SCG received one clinic visit at the beginning of the trial that w as similar in content to the first visit of the intervention group except they w ere not given the DVD or DVD player. The AAP “Balance for a Healthy Life” booklet and medical results summary w ith  AAP recommendations [11] w ere also provided to participants. |  |  |
| Intervention  length | 1 year | 1 year |  |  |

| Intensity as described by authors | 1) clinical encounters w ith the SBHC clinician every tw o to three  w eeks for a total of eight visits over one academic year. After each visit, telephone updates w ere given to the caregiver, during w hich the SBHC clinician used MI to encourage caregivers to adopt the risk reduction strategies.Sessions averaged 47 minutes for the  first session and 24 minutes for subsequent sessions. | Participants in the SCG received one clinic visit at the beginning of the trial that w as similar in content to the first visit of the intervention group except they w ere not given the DVD or DVD player. Sessions averaged for 28 minutes |
| --- | --- | --- |
| Assigned Intensity | <5 hours | < 5hours |
| Provider type  (select all) | School based health care provider | School based health care provider |
| Clinic setting (choose one—  probably) | SBHCs | SBHCs |
| Components  (choose all) | Motivational Interview ing, nutritional counseling, activity  counseling | Motivational Interview ing |

| Outcomes |  |  |  |  |  |  |  |  |  |  |  |  |
| --- | --- | --- | --- | --- | --- | --- | --- | --- | --- | --- | --- | --- |
| BMI median  percentile |  |  |  |  |  |  |  |  |  |  |  |  |
|  | Pre |  |  |  | Post |  |  |  | Difference |  |  |  |
|  | Mean | 95%CI low er  bound | 95%CI Upper  bound | P-  value | Mean | 95%CI low er  bound | 95%CI Upper  bound | P-  value | Mean | 95%CI low er  bound | 95%CI Upper  bound | P-  value |
| ACTION | 97 | 92.8 | 97.4 |  | 96.3 | 92.1 | 97.4 |  | -0.3 | -0.6 | 0.3 |  |
| Standard Care  Group | 96.2 | 91.6 | 97.8 |  | 96.1 | 91.9 | 98.5 |  | 0.2 | -0.1 | 0.8 |  |
| Betw een Group Difference | -0.6 | -1.2 | 0.1 | 0.04 | |  |  |  |  |  |  |  |

**Krebs, Nf; Gao, D; Gralla, J; Collins, Js; Johnson, Sl**

**Efficacy and safety of a high protein, low carbohydrate diet for weight loss in severely obese adolescents**

| Study  Identification |  |  |  |
| --- | --- | --- | --- |
| Sponsorship  source | Supported by the Pediatric Clinical TranslationalResearch Center (RR00069), NIH (K24-RR018357-01, T32 DK07658), and the National Cattlemen’s  Beef Association. | |  |
| Country | USA |  |  |
| Setting | - |  |  |
| Comments | - |  |  |
| Authors name | - |  |  |
| Institution | - |  |  |
| Email | - |  |  |
| Address | - |  |  |
| Methods | | | |
| Design | Randomized controlled trial |  |  |
| Group | Parallel group |  |  |
| IRB | The study protocol w as approved by the Colorado Multiple Institutional Review Board (COMIRB) and the Pediatric Clinical Research Center (CRC). All participants provided assent and their parents or guardians gave inf ormed consent.A local Data Saf ety Monitoring Board established through the CRC  review ed study data and progress at quarterly intervals. | |  |
| Outcomes other  than BMI | Other obesity, lipids, glucose metabolism, behaviors |  |  |
| Population | | | |
| Inclusion criteria | In-clusion criteria included primary obesity and a body w eightestimated to be$175% of ideal body w eight. | |  |
| Exclusion criteria | Exclusion criteria in-cluded current diagnosis of Type II Diabetes Mellitus; gallbladder, liver or renal disorders; know n eating disorders; se-vere hypercholesterolemia (total cholesterol >300 mg/dL);endocrine disorders such as hypothyroidism or polycysticovary syndrome; pregnancy; genetic disorder, such asPrader-Willi syndrome; mental retardation; severe depres-sion; or use of any chronic medication that could impact ap-petite. Patients w ith poor family  support that might havepotentially precluded compliance w ith the study require-ments w ere also excluded. | | |
| Group  differences | Randomized |  |  |
| Special  Populations | Adolescents (12-18 years) w ith severe obesity |  |  |
|  | HPLC (High protein, low carbohydrate) | LF (Low fat) | Overall |
| N | 24 | 22 | 46 |
| Sex | 54% female | 55% female | NR |
| Age | 14.2 | 13.7 | NR |
| Race | NR | NR | NR |
| BMI SDS | 2.48 | 2.51 | NR |
| Interventions | |  |  |
|  | HPLC (High protein, low carbohydrate) | LF (Low fat) |  |
| Intervention as defined by author | Subjects on the HPLC diet w ere instructed by the CRC bi- onutritionists to aim for a sustained very low carbohydrate intake (less than or equal to 20 g/d) and  for a concomitant high lean protein intake, w hich w as estimated to provide 2.0 to  2.5 g protein/kg ideal body w eight per day. Fat and energy intakes w ere not restricted; the only monitored restriction w as carbohydrate intake. Subjects w ere instructed on appropriate food choices for the diet, and each subject w as  provided a diet education booklet, including a ‘‘food pyramid’’ tailored to the HPLC diet. | The LF diet control group w as instructed on a diet w ith a daily energy intake goal of 70% of resting energy expenditure estimated from the Harris-Benedict equation and w ith less than or equal to 30% of calories from fat. The subjects received a diet education booklet, based on the USDA Food Guide Pyramid |  |
| Intervention  type | Specific diet | Specific diet |  |

| Intervention  length | 13 w eeks | 13 w eeks |
| --- | --- | --- |
| Intensity as described by author | Subjects w ere admitted to the Pediatric Clinical Research Center (CRC) for baseline testing and initiation of the diet, follow ed at 2-w eek intervals in the outpatient CRC clinic, and readmitted for 2 days at w eek 13 for final  assessments. | Subjects w ere admitted to the Pediatric Clinical Research Center (CRC) for baseline testing and initiation of the diet, follow ed at 2- w eek intervals in the outpatient CRC clinic, and readmitted for 2  days at w eek 13 for final assessments. |
| Assigned intensity | 5-25 hours | 5-25 hours |
| Provider types | Research, nutrition provider | Research, nutrition provider |
| Clinic setting | Research, multidisciplinary w eight management | Research, multidisciplinary w eight management |
| Components | Nutrition counseling, activity counseling, specific diet | Nutrition counseling, activity counseling, specific diet |

| Outcomes |  |  |  |  |  |  |  |  |  |  |
| --- | --- | --- | --- | --- | --- | --- | --- | --- | --- | --- |
| BMI |  |  |  |  |  |  |  |  |  |  |
| 13 w eeks | | | | | | | | | | |
|  | N | Mean | SE | p (across groups) |  |  |  |  |  |  |
| HPLC (High protein, low carbohydrate) | 18 | 33.9 | 1.4 | 0.26 |  |  |  |  |  |  |
| LF (Low fat) | 15 | 36.9 | 2.4 |  |  |  |  |  |  |  |
| BMI SDS | | | | | | | | | | |
| 13 w eeks | | | | | | | | | | |
|  | N | Mean | SE | p (across groups) |  |  |  |  |  |  |
| HPLC (High protein, low carbohydrate) | 18 | 2.1 | 0.1 | 0.04 |  |  |  |  |  |  |
| LF (Low fat) | 15 | 2.4 | 0.1 |  |  |  |  |  |  |  |
| BMI SDS (Change from Baseline) | | | | | | | | | | |
| 24 w eeks | |  |  |  | 36 w eeks | |  |  |  |  |
|  | N | Mean | SE | p (w ithin group) | p (betw een groups) | N | Mean | SE | p (w ithin group) | p (betw een groups) |
| HPLC (High protein, low carbohydrate) | 13 | -0.21 | 0.07 | 0.01 | NS | 11 | -0.22 | 0.09 | 0.04 | NS |
| LF (Low fat) | 14 | -0.14 | 0.04 | 0.01 |  | 11 | -0.15 | 0.04 | 0.002 |  |

**Larsen, Lm; Hertel, Nt; MÃ¸lgaard, C; Christensen, Rd; Husby, S; JarbÃ¸l, De**

**Early intervention for childhood overweight: a randomized trial in general practice**

| Study  Identification |  |  |  |
| --- | --- | --- | --- |
| Sponsorship  source | The study w as funded by the health Insurance foundation, rhode’s foundation, the Egmont foun-dation, the Tryg foundation, Institute of Clinical  research, faculty of health Sciences, university of Southern Denmark, and Odense university hospital | |  |
| Country | Denmark |  |  |
| Methods | | | |
| Design | Randomized controlled trial |  |  |
| Group | Parallel group |  |  |
| IRB | Approved by the Regional Committee for Ethics and the Danish Data Protection Agency (no mention of consent/assent) | |  |
| Outcomes other  than BMI | Other obesity |  |  |
| Population | | | |
| Inclusion criteria | Overw eight five- to nine-year-old children w ere identified in general practice using the International Obesity Task force (IOTf) criteria | |  |
| Exclusion  criteria | Exclusion criteria w ere: non-Danish-speaking families, previous or current participation in another project concerning overw eight and obesity, mental or  physical disabilities, endocrine causes of obesity, or signs of precocious puberty. | | |
| Group  differences | Randomized (block randomization) |  |  |
| Special  populations | None |  |  |
|  | Model 1 | Model 2 | Overall |
| N | 35 | 45 | 80 |
| Sex | 62.9% female | 66.7% female | NR |
| Age | 6.3 | 6.1 | NR |
| Race | NR | NR | NR |
| BMI SDS | 2.79 | 2.88 | NR |
| Interventions | |  |  |
|  | Model 1 | Model 2 |  |
| Intervention as defined by authors | Monthly consultations in general practice during the first study year including focus on lifestyle habits, diet, and physical activity. In the second study year the frequency of consultations w as recommended to be every tw o months, adjusted to the needs of the individual  family. All participants received literature on healthy diet and physical activity. | Intervention as in Model 1, supplemented w ith three educational programmes, each of three hours’ duration, for groups of 2–5 families. The edu-cational sessions in Model 2 w ere intended to take place at study start, after tw o months, and after one year and w ere performed by a dietitian, a physical exercise instructor, and a psychologist w ith the purpose of promoting a healthy lifestyle through know ledge and  inspiration to a healthy diet and enjoyable physical activities. |  |
| Intervention  type | Lifestyle | Lifestyle |  |
| Intervention  length | 2 years | 2 years |  |
| Intensity as  described by authors | Monthly consultations in general practice during the first study year; every tw o months in second year. | Monthly consultations in general practice during the first study year; every tw o months in second year. Plus 3 3-hour programs. |  |
| Assigned intensity | 5-25 hours | 5-25 hours |  |
| Provider types | Primary care | Primary care, nutrition provider, exercise, mental health |  |
| Clinic setting | Primary care | Primary care |  |
| Components | Nutrition counseling, activity counseling | Nutrition counseling, activity counseling |  |

| Outcomes |  |  |  |  |  |
| --- | --- | --- | --- | --- | --- |
| BMI SDS |  |  |  |  |  |
|  | 2 years |  |  |  |  |
|  | N | Mean | CI (low er bound) | CI (upper bound) | p (across groups) |
| Model 1 | 34 | -0.2 | -0.38 | -0.01 | 0.59 |
| Model 2 | 40 | -0.26 | -0.44 | -0.09 |  |

**Lison, Jf; Real-Montes, Jm; Torro, I; Arguisuelas, Md; Alvarez-Pitti, J; Martinez-Gramage, J; Aguilar, F; Lurbe, E**

**Exercise intervention in childhood obesity: a randomized controlled trial comparing hospital-versus home-based groups**

| Study  Identification |  |  |  |  |
| --- | --- | --- | --- | --- |
| Sponsorship  source | This w ork w as supported by grants from the Comunidad ValencianaGovernment (GV06/227). | |  |  |
| Country | Spain |  |  |  |
| Setting | - |  |  |  |
| Comments | - |  |  |  |
| Authors name | - |  |  |  |
| Institution | - |  |  |  |
| Email | - |  |  |  |
| Address | - |  |  |  |
| Methods | | | | |
| Design | Randomized controlled trial |  |  |  |
| Group | Parallel group |  |  |  |
| IRB | In all cases, inf ormed consentw as obtained from parents and participants bef ore random-ization. The study w as approved by the Ethical Committeeof the General Hospital, University of Valencia, Spain. | | |  |
| Outcomes  other than BMI | Other obesity |  |  |  |
| Population | | | | |
| Inclusion  criteria | White OW/OB children and adolescents of both sexes,ranging from 6 to 16 years of age | |  |  |
| Exclusion criteria | Patients w ith secondary obesity syndromes or w ith acute illnesses w ereexcluded from the study. Subjects w ith severe obesity(z score > 2.5) w ere excluded because individuals in thiscategory require specific individualized programs to avoidpotential orthopedic problems. None of the subjects w eretaking regular  medication, nor did they display any clinicalmanifestations of illness. | | | |
| Group  differences | Randomized |  |  |  |
| Special  populations | None |  |  |  |
|  | Control | HOX (Home-Based) | GRX (Hospital Clinic Group-Based) | Overall |
| N | 24 | 41 | 45 | 110 |
| Sex | 54% male | 51% male | 49% male | NR |
| Age | 11.2 | 11.9 | 12.3 | NR |
| Race | 100% w hite | 100% w hite | 100% w hite | 100%  w hite |
| BMI SDS | 2.23 | 2.1 | 2.11 | NR |
| Interventions | |  |  |  |
|  | Control | HOX (Home-Based) | GRX (Hospital Clinic Group-Based) |  |
| Intervention as described by authors | Control group participants w ere instructed about diet and other lifestyle changes during their regular visits to the hospital, but neither received the exercise nor the nutrition educational sessions as for the intervention groups. Control group participants maintained their usual levels of daily activity, w ith no additional exercise components. | HOX group participants w ere instructed to complete all exercises in their home environment.  Their program also consisted of 5 sessions per w eek (6 months, 120 sessions). The duration of each session w as approximately 60 minutes and involved both resistance and aerobic training exercises (circuit training; Fig. 2). | GRX subjects w ere provided w ith 5 supervised exercise sessions per w eek for 6 months (120 sessions). The participants and their parents w ere strongly advised to attend a minimum of 3 sessions per w eek (minimum attendance rate). Subjects  w ere made to understand that “three” w as the  minimum required number of sessions per w eek to improve body composition. Exercise training w as conducted at the hospital by a physical education instructor. Parents w ere allow ed to remain present |  |

|  |  |  | during the sessions. Each session lasted 60 minutes, during w hich time 5 minutes w ere allocated for w arming up and cooling dow n (stretching), 35 minutes w ere allocated to moderate aerobic activity, and 20 minutes to resistance training (low -load, high-repetition  exercises). |
| --- | --- | --- | --- |
| Intervention  type | Lifestyle | Lifestyle | Lifestyle |
| Intervention  length | 6 months | 6 months | 6 months |
| Intensity as described by authors | "Regular visits" | Study volunteers belonging to GRX and HOX groupsand their parents jointly attended tw o 1-hour educationalsessions conducted by 2 pediatricians at the Hospital. HOX group participants w ere instructed to complete allexercises in their home environment. Their program alsoconsisted of 5 sessions per w eek (6 months, 120 sessions).The duration of each session w as approximately 60minutes and involved both resistance and aerobic trainingexercises | Study volunteers belonging to GRX and HOX groupsand their parents jointly attended tw o 1-hour educationalsessions conducted by 2 pediatricians at the Hospital. GRX subjects w ere provided w ith 5 supervised exercisesessions per w eek for 6 months (120 sessions). The partic-ipants and their parents w ere strongly advised to attenda minimum of 3 sessions per w eek (minimum attendancerate). Subjects w ere made to understand that “three”  w asthe minimum required number of sessions per w eek toimprove body composition. |
| Assigned intensity | <5 hours | <5 hours | 52+ hours |
| Provider types | Primary care | Primary care, exercise provider | Primary care, exercise provider |
| Clinic setting | Multidisciplinary w eight management | Multidisciplinary w eight management | Multidisciplinary w eight management |
| Components | Usual care | Nutrition counseling, activity counseling | Nutrition counseling, activity counseling, activity  training |

| Outcomes |  |  |  |  |
| --- | --- | --- | --- | --- |
| BMI SDS |  |  |  |  |
|  | 6 months |  |  |  |
|  | N | Mean | p (w ithin group) | p (across groups) |
| Control | 20 | 2.22 | 0.882 | 0.002 |
| HOX (Home-Based) | 32 | 1.88 | <0.0001 |  |
| GRX (Hospital Clinic Group-Based) | 32 | 1.94 | <0.0001 |  |
| BMI | | | | |
|  | 6 months |  |  |  |
|  | N | Mean | p (w ithin group) | p (across groups) |
| Control | 20 | 30.8 | <0.0001 | <0.0001 |
| HOX (Home-Based) | 32 | 27.3 | <0.0001 |  |
| GRX (Hospital Clinic Group-Based) | 32 | 29.3 | 0.104 |  |

**Looney, Sm; Raynor, Ha**

**Examining the effect of three low-intensity pediatric obesity interventions: a pilot randomized controlled trial**

| Study  Identification |  |  |  |  |
| --- | --- | --- | --- | --- |
| Sponsorship  source | This research w as partially funded by the Amy Joye Memorial Research Aw ard from the Academy of Nutrition and Dietetics Foundation. | | |  |
| Country | USA |  |  |  |
| Methods | | | | |
| Design | Randomized controlled trial |  |  |  |
| Group | Parallel group |  |  |  |
| IRB | The study w as approved by the institutional r review boards at the University of Tennessee, Cherokee Health Systems, | | |  |
| Outcomes  other than BMI | Behaviors |  |  |  |
| Population | | | | |
| Inclusion  criteria | Participants w ere overw eight or obese, BMI-for-age ≥85th percentile,7 children aged 4- to 10-years. | |  |  |
| Exclusion criteria | Families w ere excluded if the child had a medical condi-tion that affected grow th, dietary intake, or physical activity; the child w as participating in a w eight loss pro-gram and/or taking w eight loss medication; the primary caretaker did not w ant to participate; the caretaker did not speak or read English; the child did not speak English; the family did not have a w orking telephone number; the child spent <50% of their time at the primary caretaker’s home; or the family planned to  move out of the East Tennessee area w ithin the time frame of the study. | | | |
| Group  differences | Randomized |  |  |  |
| Special  Populations | None |  |  |  |
|  | N | N+GM | N+GM+BC | Overall |
| N Enrolled | 8 | 7 | 7 | 8 |
| Sex (%  female) | % female 85.7 | 85.7 | 85.7 | % female  37.5 |
| Age in years  (M ± SD) | 7.3 +- 1.8 | 8.6 +- 1.8 | 8.2 +- 1.8 | 7.3 ± 1.8 |
| Race (%) | Asian 0%/AA 12.5%/White 62.5%/2 or more races 25% | Asian 0%/AA 0%/w hite 85.7%/2 or more races 14.3% | Asian 14.3%/AA 0%/White 71.4%/2 or more races 14.3% | Asian 0.0; Black or AA, 12.5; White, 62.5; Tw o or more races  25.0 |
| BMIz | 2.21 + - 0.66 | 2.39 +- 0.34 | 2.45 +- 0.36 | 2.21 ± 0.66 |
| Interventions | |  |  |  |
|  | N | N+GM | N+GM+BC |  |
| Intervention as defined by author | In addition to the child’s usual care (eg, w ell- child visits, sick visits) from the pediatrician,  families in the N condition w ere mailed 6 monthly educational new sletters on nutrition and leisure-time activity topics. Each topic provided nutrition and leisure-time activity recommendations to assist w ith child  overw eight and obesity. | Families in the N + GM condition, continued to receive usual care (eg, w ell-child visits, sick visits) and w ere mailed the same monthly new sletter as in the N condition, but also monitored and received feedback monthly about their child’s grow th over 6 months. Each family in the N + GM condition w as provided w ith  grow th monitoring materials, w hich included a scale,  w all grow th chart, a BMI w heel, a BMI-for-age grow th chart, a graph ease plotting tool, and a self -monitoring | ach family continued to receive usual care (eg, w ell child visits, sick visits) from the child’s pediatrician, w as mailed a monthly new sletter as in the N and N + GM conditions and given all materials to monitor their child’s grow th as in the N+GM |  |

|  |  | diary to record the child’s height, w eight, BMI, and BMI  percentile. |  |
| --- | --- | --- | --- |
| Intervention  type (choose one) | Lifestyle | Lifestyle | Lifestyle |
| Intervention  length | 6 months | 6 months | 6 months |
| Intensity as described by authors | Because of the only additional contact being through mail, families w ere considered to have minimal contact time over the 6 months. | Over the 6 months of intervention, families had monthly contact (3, 15-minute in-person appointments, and 3, 10-minute phone calls) for a total of 1 hour and 15 minutes of contact time. | Over the 6 months of interven-tion, families had monthly contact (3, 30- minute in-per-son appointments, and 3, 20-minute phone calls) for a total of 2 hours and 30 minutes of  contact time. |
| Assigned  Intensity | < 5 hours | < 5 hours | < 5 hours |
| Provider type (select all) | primary care | primary care, background/training of the interventionist w as not specified | primary care, nutrition, mental health for behavioral counseling,  interventionist |
| Clinic setting (choose one—  probably) | primary care | Primary care | Primary care |
| Components  (choose all) | Usual care | Nutritional counseling | Nutritional and behavioral  counseling |

| Outcomes |  |  |  |  |  |  |  |  |  |  |
| --- | --- | --- | --- | --- | --- | --- | --- | --- | --- | --- |
| BMIZ |  |  |  |  |  |  |  |  |  |  |
|  | Baseline |  |  |  |  | 6 months |  |  |  |  |
|  | Mean | SD | Condition | P-value (Time) | Condition x Time | Mean | SD | Condition | P-value (Time) | Condition x Time |
| N | 2.21 | 0.66 |  |  |  | 2.14 | 0.54 |  |  |  |
| N+GM | 2.39 | 0.34 |  |  |  | 2.31 | 0.26 |  |  |  |
| N+GM+BC | 2.45 | 0.36 |  |  |  | 2.29 | 0.55 | ns | 0.036 | ns |

**Love-Osborne, K; Fortune, R; Sheeder, J; Federico, S; Haemer, Ma**

**School-based health center-based treatment for obese adolescents: feasibility and body mass index effects**

| Study  Identification |  |  |  |
| --- | --- | --- | --- |
| Sponsorship  source | This study w as funded by the Colorado Health Foundation. In-kind support w as provided by Denver Health and Hospitals | |  |
| Country | USA |  |  |
| Methods | | | |
| Design | Randomized controlled trial |  |  |
| Group | Parallel group |  |  |
| IRB | Participants had parental consent to be treated in the SBHC. The Colorado Multiple Institutional Review Board approved the study, w hich included w aiver of  parental consent. Students completed inf ormed consent, and letters w ere sent to parents w ith instructions to contact study staff if they did not w ant their adolescent to participate in the study. | | |
| Outcomes other  than BMI | CV fitness |  |  |
| Population | | | |
| Inclusion criteria | During the fall of 2010, adolescents w ith BMI >= 85% w ere recruited from the SBHC population at tw o schools. Both SBHCs are located w ithin public schools  w ith high percentages of underserved students, largely ethnic minorities. | | |
| Exclusion criteria | None noted. |  |  |
| Group differences | Randomized |  |  |
| Special populations | School, underserved and largely ethnic minorities |  |  |
|  | Intervention | Control | Overall |
| N | 82 | 83 | 165 |
| Sex | 58% female | 46% female | NR |
| Age | 15.7 | 16 | NR |
| Race | 88% Hispanic | 89% Hispanic | NR |
| BMI SDS | 1.92 | 1.89 | NR |
| Interventions | |  |  |
|  | Intervention | Control |  |
| Intervention as defined by authors  Intervention type | IG participants w ere seen by the educator for visits afterrecruitment w as complete.Both groups received preventive services, including physical examinations and laboratory screening in the SBHC. The educator met w ith the IG during the academic year, utilizing motivational interview ing techniques to set lifestyle goals. Text messaging w as used to reinf orce goals betw een visits  Lifestyle | Both groups received preventive services, including physical examinations and laboratory screening in the SBHC.  Lifestyle |  |
| Intervention length Intensity as described by | 6 months  Frequency designed to be participant directed; at end of each visit, student asked if w ished to return in 2 | 6 months  Usual care |  |
| authors  Assigned intensity | w eeks, 1 month, or 2 months.  <5 hrs | <5 hours |  |
| Provider types | Primary care, other (health educator) | Primary care |  |
| Clinic setting | School based health center | School based health center |  |
| Components | Nutrition counseling, activity counseling, motivational interview ing | Usual care |  |

| Outcomes |
| --- |
| BMI z-score (85-95% subgroup) |
| 6 months |

|  | N | Median | Range (low er bound) | Range (upper bound) | p (across groups) |
| --- | --- | --- | --- | --- | --- |
| Intervention | 20 | 0.11 | -0.39 | 0.72 | 0.65 |
| Control | 23 | -0.03 | -0.67 | 0.46 |  |
| BMI z-score (95-99% subgroup) | | | | | |
|  | 6 months |  |  |  |  |
|  | N | Median | Range (low er bound) | Range (upper bound) | p (across groups) |
| Intervention | 40 | 0.02 | -0.67 | 0.47 | 0.81 |
| Control | 35 | -0.07 | -0.48 | 0.45 |  |
| BMI z-score (99%+ subgroup) |  |  |  |  |  |
|  | 6 months |  |  |  |  |
|  | N | Median | Range (low er bound) | Range (upper bound) | p (across groups) |
| Intervention | 17 | 0.01 | -0.09 | 0.15 | 0.36 |
| Control | 14 | 0.01 | -0.22 | 0.12 |  |

**MacDonell**

**A pilot study of motivational interviewing targeting weight-related behaviors in overweight or obese African American adolescents**

| Study Identification |  |  |  |
| --- | --- | --- | --- |
| Sponsorship source | This project w as funded by the Children’s Research Center of Michigan. The authors thank all the families w ho participated and made this possible. | | |
| Country | USA |  |  |
| Methods |  |  |  |
| Design | Randomized controlled trial |  |  |
| Group | Parallel group |  |  |
| IRB | The Human Investigation Committee approved the trial. |  |  |
| Outcomes other than BMI | Behavior |  |  |
| Population |  |  |  |
| Inclusion criteria | Eligibility criteria included the follow ing: (1) BMI85th percentile based on CDC age- and sex-specific norms; (2) self-identified as African American;  (3) age betw een 13 and 17 years;band (4) residing w ith a caregiver w illing to participate in thetreatment. | | |
| Exclusion criteria | Exclusion criteria w ere pregnancy, moderate mentalretardation, psychosis, or medical comorbidities. | |  |
| Group differences | Yes, the intervention group had a significantly higher BMI percentile (df=42, p=0.04). |  |  |
| Special Populations | African American population |  |  |
|  | MI | Nutrition Counseling | Overall |
| N Enrolled | NR? | NR? | 44 |
| Sex | (%female) 81.8 | 77.3 | 79.5 |
| Age in years | 15.05 | 15.18 | 15.11 |
| Race | All AA | All AA | All AA |
| BMI | 3668 | 34.04 | 35.36 |
| BMI percentile | 98.03 | 95.44 | 96.74 |
| Interventions | |  |  |
|  | MI | Nutrition Counseling |  |
| Intervention as defined by author | Healthy Choices, a four-session MI intervention to reduce HIV-related risk behaviors in African American youth. Healthy Choices w as adapted by asking adolescents to choose changes in nutrition or activity in w eek 1, w ith the second behavior discussed in w eek 2 by using standard MI techniques to elicit and reinf orce change talk. The dietitian met first w ith the adolescent and then w ith the caregiver, and later devised a change plan w ith the dyad using a menu of change  options specific to w eight loss. Subsequent sessions focused on barriers and facilitators to eating/activity behaviors and revision of the change plan. | For the control condition, a manual w as developed for four sessions of nutritional counseling w ith caregivers and adolescents together, based on recommendations of the Expert Committee |  |
| Intervention type (choose  one) | Lifestyle | Lifestyle |  |
| Intervention length | 3 months | 3 months |  |
| Intensity as described by authors | Intervention and control conditions w ere matched for dose, timing, and interventionist—both w ere four 60-minute sessions w ith adolescent–caregiver dyads delivered by registered dietitians at w eeks 1, 2, 6, and 10. | Intervention and control conditions w ere matched for dose, timing, and interventionist—both w ere four 60- minute sessions w ith adolescent– caregiver dyads delivered by registered  dietitians at w eeks 1, 2, 6, and 10. |  |
| Assigned Intensity | <5 hours | <5 hours |  |
| Provider type (select all) | Nutrition provider | Nutrition provider |  |
| Clinic setting (choose one—probably) | Primary Care | Primary care |  |
| Components (choose all) | Nutrition counseling, activity counseling, motivational Interview ing | Nutrition counseling |  |

Outcomes

| BMI |  |  |  |  |  |  |  |  |
| --- | --- | --- | --- | --- | --- | --- | --- | --- |
|  | Baselin  e |  | 3-months |  |  |  |  |  |
|  | Mean | SD | Mean | SD | Independent sample t-test (betw een  subjects) p-value | Cohen's  d | Paired samples t-test (w ithin subjects) p-  value | Cohen's  d- |
| MI | 37.6 | 6.82 | 38.1 | 6.9 | 0.74 | 0.12 | 0.24 | 0.07 |
| Nutrition Counseling | 34.92 | 8.44 | 35.78 | 9.88 |  |  | 0.36 | 0.09 |

**Makkes, S; Renders, Cm; Bosmans, Je; Baan-Slootweg, Oh; Hoekstra, T; Seidell, Jc**

**One-year effects of two intensive inpatient treatments for severely obese children and adolescents**

| Study Identification |  |  |  |
| --- | --- | --- | --- |
| Sponsorship  source | The study is funded by The Netherlands Organization for Health Research and Development (ZonMw ) | |  |
| Country | The Netherlands |  |  |
| Methods |  |  |  |
| Design | Randomized controlled trial |  |  |
| Group | Parallel group |  |  |
| IRB | The Medical Ethics Committee of the VU University Medical Center(Amsterdam, the Netherlands) approved the study protocol. Prior torandomization,  w ritten inf ormed consent w as obtained from both theparticipants and their parents/caregivers. | | |
| Outcomes other  than BMI | Other obesity, blood pressure, glucose metabolism, lipids |  |  |
| Population |  |  |  |
| Inclusion criteria | (8–19 years) w ith severe obesity (BMIz>3.0 or BMIz>2.3 w ith comorbidity) |  |  |
| Exclusion criteria | Participants w ere excluded from the study if they had syndromal or chromosomal determined obesity; obesity caused by endocrine abnormalities or  medicine use; psychiatric problems; an IQ below 75 or if their parents/caregivers w ere not w illing or able to participate in the treatment and/or study | | |
| Group differences | Randomized |  |  |
| Special  Populations | Severe obesity |  |  |
|  | Short-stay group | Long-stay group | Overall |
| N | 40 | 40 | 80 |
| Sex | 70% female | 62.5% female | 66.3% female |
| Age | 14.5 | 15 | 14.8 |
| Race | 69.2% Western, 30.8% non-Western | 53.8% Western, 46.2% non-Western | 61.5% Western,  38.5% non- Western |
| BMI SDS | 3.4 | 3.4 | 3.4 |
| Interventions | |  |  |
|  | Short-stay group | Long-stay group |  |
| Intervention as defined by author | The treatment focused on nutri-tion, physical activity and behavior change and requiredactive participation of the parents/caregivers. | The treatment focused on nutri-tion, physical activity and behavior change and requiredactive participation  of the parents/caregivers. |  |
| Intervention type | Lifestyle | Lifestyle |  |
| Intervention length | 1 year | 1 year |  |
| Intensity as described by  authors | During w eekdays, the short-stay group participated in a tw omonth inpatient treatment, follow ed by biw eekly return visits of tw o days during the next four  months, then follow ed by six monthly return visits of tw o days. | The long-stay group participated in a six-month inpatient treatment during w eekdays, follow ed by six  monthly return visits of tw o days. |  |
| Assigned intensity | 52+ hours | 52+ hours |  |
| Provider types | Specialist | Specialist |  |
| Clinic setting | Inpatient; Multidisciplinary w eight management program | Inpatient; Multidisciplinary w eight management  program |  |
| Components | Nutrition counseling, activity counseling, nutrition training, activity training,  mental health | Nutrition counseling, activity counseling, nutrition  training, activity training, mental health |  |

Outcomes

| BMI SDS |  |  |  |  |  |  |  |  |
| --- | --- | --- | --- | --- | --- | --- | --- | --- |
|  | 6 months |  |  | 12 months | |  |  |  |
|  | N | Mean | SD | p (betw een groups) | N | Mean | SD | p (betw een groups) |
| Short-stay group | 40 | 3.1 | 0.5 | <0.05 | 37 | 3.1 | 0.6 | NS |
| Long-stay group | 37 | 2.9 | 0.6 |  | 30 | 2.9 | 0.7 |  |

**Martinez-Andrade, Go; Cespedes, Em; Rifas-Shiman, Sl; Romero-Quechol, G; Gonzalez-Unzaga, Ma; Benitez-Trejo, Ma; Flores-Huerta, S; Horan, C; Haines, J; Taveras, Em; Perez-Cuevas, R; Gillman, Mw**

**Feasibility and impact of Creciendo Sanos, a clinic-based pilot intervention to prevent obesity among preschool children in Mexico City**

| Study  Identification |  |  |  |
| --- | --- | --- | --- |
| Sponsorship  source | None listed |  |  |
| Country | Mexico |  |  |
| Methods | | | |
| Design | Cluster randomized controlled trial |  |  |
| Group | Parallel group |  |  |
| IRB | Institutional Review Boards in theUnited States (Harvard Pilgrim Health Care HumanStudies Committee) and Mexico (Comisión de Ética,Comisión Nacional  de Investigación Científica, IMSS) ap-proved the study. | | |
| Outcomes other  than BMI | Behaviors |  |  |
| Population | | | |
| Inclusion criteria | Participants comprised children aged 2 - <5 years of age w hose BMI (calculated as w eight in kilograms divided by height in meters squared) w as above the median for age and sex (BMI z-score 0 - 3); w ho attended one of the participating IMSS clinics during the recruitment period for pediatric care, vaccination, or  accompanying a family member; and w hose parent or caregiver gave w ritten con- sent to participate. | | |
| Exclusion criteria | Families w ere excluded if they planned to move residences or change primary care clinics duringthe study period; the child had motor limitations  (e.g.,physical disability or delay); or required a special diet bymedical indication. | |  |
| Group  differences | Intervention had more normal w eight (cluster randomized). |  |  |
| Special populations | Very young children (2-5 years) |  |  |
|  | Intervention | Usual Care | Overall |
| N | 168 | 138 | 306 |
| Sex | 51.8% male | 53.6% male | 52.6%  male |
| Age | 3.34 | 3.43 | 3.38 |
| Race | NR | NR | NR |
| BMI SDS (WHO) | 1.28 | 1.26 | 1.27 |
| Interventions | Intervention | Usual Care |  |
| Intervention as described by authors | Participants randomized to intervention received a 6w eek curriculum focused on obesity aw areness and pre-vention. A trained nutritionist led diet, healthy grow thand physical activity w orkshops, w hile a health educatorled w orkshops on instilling healthy habits and routinesin childhood. The nurse provided child care and devel-oped relevant games and activities for children w hileparents attended the w orkshops. | Usual care only, there are no standardizedintervention programs specific to providing treatment to overw eight or obese children at IMSS health care sys-tem. |  |
| Intervention type | Lifestyle | Usual care only |  |
| Intervention  length | 6 w eeks | NA |  |
| Intensity as described by  authors | The 6 educational sessions w ere 2 hours each | NA |  |
| Assigned  intensity | 5-25 hours | NA |  |
| Provider types | Primary care, nutrition provider, other (health educator) | Primary care |  |
| Clinic setting | Primary care | Primary care |  |

| Components | Nutrition counseling, activity counseling, nutrition training, activity training, motivational  interview ing | Usual Care only |
| --- | --- | --- |

| Outcomes |  |  |  |  |  |  |  |  |
| --- | --- | --- | --- | --- | --- | --- | --- | --- |
| BMI |  |  |  |  |  |  |  |  |
|  | 3 months |  |  |  | 6 months |  |  |  |
|  | N | Mean | SE | p (across groups) | N | Mean | SE | p (across groups) |
| Intervention | 99 | -0.26 | 0.01 | NS | 109 | -0.32 | 0.01 | NS |
| Usual Care | 102 | -0.44 | 0.01 |  | 102 | -0.43 | 0.01 |  |
| BMI SDS | | | | | | | | |
|  | 3 months |  |  |  | 6 months |  |  |  |
|  | N | Mean | SE | p (across groups) | N | Mean | SE | p (across groups) |
| Intervention | 99 | -0.18 | 0.01 | NS | 109 | -0.18 | 0.01 | NS |
| Usual Care | 102 | -0.25 | 0.01 |  | 102 | -0.25 | 0.01 |  |

**McCallum, Z; Wake, M; Gerner, B; Baur, La; Gibbons, K; Gold, L; Gunn, J; Harris, C; Naughton, G; Riess, C; Sanci, L; Sheehan, J; Ukoumunne, Oc; Waters, E Outcome data from the LEAP (Live, Eat and Play) trial: a randomized controlled trial of a primary care intervention for childhood overweight/mild obesity**

| Study Identification |  |  |  |
| --- | --- | --- | --- |
| Sponsorship source | This study w as funded by anAustralian Health Ministers’ Advisory Council PriorityDriven Research Project Grant (AHMAC PDR 2001/15). | |  |
| Country | Australia |  |  |
| Methods |  |  |  |
| Design | Randomized controlled trial |  |  |
| Group | Parallel group |  |  |
| IRB | The project w as approved by the RoyalChildren’s Hospital Ethics in Human Research Committee( EHRC 2109) | |  |
| Outcomes other  than BMI | Psychosocial, behaviors |  |  |
| Population |  |  |  |
| Inclusion criteria | All children classified as overw eight or mildly obese in the BMI survey, w ho w ere not receiving ongoing w eight management in a secondary or  tertiary care programme and w hose parents had provided contact details, w ere eligible to take part in the LEAP RCT | | |
| Exclusion criteria | Any chromosomal, endocrine ormedical condition/disability/ medication w hich, in the judge-ment of the investigators, could have an impact on  theirw eight or grow th. | |  |
| Group differences | Randomized |  |  |
| Special populations | None |  |  |
|  | Intervention | Control | Overall |
| N | 82 | 81 | 163 |
| Sex | 49% female | 54% female | 52%  female |
| Age | 7.5 | 7.4 | 7.4 |
| Race | NR | NR | NR |
| BMI SDS (UK) | 2 | 1.9 | 1.9 |
| Interventions | |  |  |
|  | Intervention | Control |  |
| Intervention as  defined by authors | GPs used a brief solution-focused approach10to setand record appropriate, healthy lifestyle  goals w ith thef amily, assisted by a personalized 20-page ‘Family Folder’designed at a 12-year-old reading level and previously piloted. | Control families w ere notified of their  status vialetter and w ere not identified to the GPs at any time. |  |
| Intervention type | Lifestyle | Usual care |  |
| Intervention length | 12 w eeks | NA |  |
| Intensity as  described by authors | Parents w ere asked to attend four consultations over a 12-w eek period. | NA |  |
| Assigned intensity | <5 hours | NA |  |
| Provider types | Primary care | Primary care |  |
| Clinic setting | Primary care | Primary care |  |
| Components | Nutrition counseling, activity counseling, motivational interview ing | Usual care |  |

| Outcomes |  |
| --- | --- |
| BMI |  |
| 9 months | 15 months |

|  | N | Mean | SD | p (betw een groups) | N | Mean | SD | p (betw een groups) |
| --- | --- | --- | --- | --- | --- | --- | --- | --- |
| Intervention | 73 | 21 | 2.6 | 0.61 | 70 | 21.7 | 3.1 | 0.31 |
| Control | 80 | 20.8 | 2.2 |  | 76 | 21.2 | 2.4 |  |
| BMI SDS (UK) |  |  |  |  |  |  |  |  |
|  | 9 months |  |  | 15 months | |  |  |  |
|  | N | Mean | SD | p (betw een groups) | N | Mean | SD | p (betw een groups) |
| Intervention | 73 | 1.96 | 0.64 | 0.71 | 70 | 2 | 0.68 | 0.42 |
| Control | 80 | 1.93 | 0.57 |  | 76 | 1.92 | 0.59 |  |

**Mirza, Nm; Palmer, Mg; Sinclair, Kb; McCarter, R; He, J; Ebbeling, Cb; Ludwig, Ds; Yanovski, Ja**

**Effects of a low glycemic load or a low-fat dietary intervention on body weight in obese Hispanic American children and adolescents: a randomized controlled trial**

| Study  Identification |  |  |  |
| --- | --- | --- | --- |
| Sponsorship source | 3Supported by NIH grants K23-RR022227 (NMM), MO1-RR-020 359, and UL1RR03198 8, w hich w ere aw arded by the National Center for Re-search Resources to support the General Clinical Research Center and theChildren’s Research Institute at Children’s National Medical Center, andZIA-HD-00641 (JAY) and the  follow ing foundations and organizations:Consumer Health Foundation, The Jessie Ball DuPont Foundation, andUnited Way of the National Capital Area. JAY is supported by the IntramuralResearch Program of theEunice Kennedy ShriverNational Institute of ChildHealth and Human Development and the National Institute on MinorityHealth and Health Disparities of the NIH. DL is supported in part by careeraw ard K24DK082730 from the National Institute of Diabetes and  Digestiveand Kidney Diseases. | | |
| Country | USA |  |  |
| Methods | | | |
| Design | Randomized controlled trial |  |  |
| Group | Parallel group |  |  |
| IRB | The study w as approved by the CNMC Institutional Review Board. Signed consents w ere obtained from parents of partici- pating children, and assents w ere  obtained from the children and adolescents. | | |
| Outcomes other  than BMI | Behaviors, glucose metabolism |  |  |
| Population | | | |
| Inclusion  criteria | Hispanic children aged 7–15 y w ith a BMI $ 95th percentile for age and sex w ho w ere otherw ise healthy w ere eligible. | |  |
| Exclusion criteria | xclusion criteria included any know n medical condition that w ould interfere w ith study ob- jectives or procedures, such as preexisting T2D, Cushing syn- drome,  untreated hypothyroidism, pervasive developmental disorder, severe asthma, untreated depression, use of medica- tions know n to promote w eight gain or loss, and obesity-associated genetic syndromes | | |
| Group  differences | Randomized |  |  |
| Special  populations | Hispanic youth |  |  |
|  | Low -Glycemic Load Diet | Low -fat diet | Overall |
| N | 57 | 56 | 113 |
| Sex | 44% male | 59% male | NR |
| Age | 11.8 | 11.5 | NR |
| Race | 100% Hispanic | 100% Hispanic | 100%  Hispanic |
| BMI SDS | 2.25 | 2.24 | NR |
| Interventions | |  |  |
|  | Low -Glycemic Load Diet | Low -fat diet |  |
| Intervention as described by authors | The nutrition educationsessions w ere divided into 12 modules taught over a 12-w kcourse. For the LGD group, participants and their parents w eregiven instructions and specific examples to low er the GL of theirdiets by replacing high-GI sources of carbohydrates w ith LGIfood sources, replacing energy from carbohydrates w ith energyfrom protein and fat, and balancing meals and snacks w ith LGIcarbohydrates, protein, and low -fat food sources. ypicallyconsumed foods or favorite foods that had a high GI. The ob-jective w as to achieve macronutrient composition for the LGD of 45–50% LGI carbohydrates, 20–25% protein, and 30–35% fateach day, w ith an emphasis on achieving the  target macronu-trient distribution at each meal. All subjects also | The nutrition educationsessions w ere divided into 12 modules taught over a 12-w kcourse. For the LFD group, participantsand their parents w ere given instructions and specific examplesto limit dietary fat intake and increase the intake of grains on thebasis of current low -fat dietary recommendations (23). Thecomposition of the LFD w as targeted to  achieve 55–60% car-bohydrates (w ith no discrimination by GI), 15–20% protein, and25–30% fat. All subjects also participated in sessions to increase theirphysical activity and reduce their sedentary behaviors. |  |

|  | participated in sessions to increase theirphysical activity and reduce  their sedentary behaviors. |  |
| --- | --- | --- |
| Intervention  type | Specific diet | Specific diet |
| Intervention  length | 12 w eeks | 12 w eeks |
| Intensity as described by authors | Program delivery w as through 12 w eekly group sessions, w hich w ere separate for parents and children, and w eekly family sessions at w hich the interventionist met w ith each child and parent individually. Follow -up after the intensive w eekly phase of the intervention consisted of monthly follow -ups for 9 mo and then 3-monthly follow -ups for 12 mo for a total  follow -up interval of 2 y. | Program delivery w as through 12 w eekly group sessions, w hich w ere separate for parents and children, and w eekly family sessions at w hich the interventionist met w ith each child and parent individually. Follow -up after the intensive w eekly phase of the intervention consisted of monthly follow -ups for 9 mo and then 3-monthly follow -ups for 12 mo for a total  follow -up interval of 2 y. |
| Assigned  intensity | 5-25 hours | 5-25 hours |
| Provider types | Primary care, nutrition provider | Primary care, nutrition provider |
| Clinic setting | Primary care | Primary care |
| Components | Nutrition counseling, activity counseling, nutrition training, activity  training | Nutrition counseling, activity counseling, nutrition training, activity  training |

| Outcomes |  |  |  |  |  |  |  |  |  |  |
| --- | --- | --- | --- | --- | --- | --- | --- | --- | --- | --- |
| BMI SDS (ITT) |  |  |  |  |  |  |  |  |  |  |
|  | 12  months |  |  |  |  | 24  months |  |  |  |  |
|  | N | Mean | CI (low er  bound) | CI (upper  bound) | p (across  groups) | N | Mean | CI (low er  bound) | CI (upper  bound) | p (across  groups) |
| Low -Glycemic Load  Diet | 36 | 2.1 | 2.05 | 2.16 | 0.185 | 33 | 2.1 | 2.02 | 2.16 | 0.199 |
| Low -fat diet | 33 | 2.16 | 2.1 | 2.11 |  | 31 | 2.16 | 2.09 | 2.22 |  |

**Naar-King, S; Ellis, D; Kolmodin, K; Cunningham, P; Jen, Kl; Saelens, B; Brogan, K**

**A randomized pilot study of multisystemic therapy targeting obesity in African-American adolescents**

| Study  Identification |  |  |  |
| --- | --- | --- | --- |
| Sponsorship  source | This project w asfunded by the American Diabetes Association. |  |  |
| Country | USA |  |  |
| Methods | | | |
| Design | Randomized controlled trial |  |  |
| Group | Parallel group |  |  |
| IRB | The Human Investigation Committee of the university affiliated w ith the hospital approved the research | |  |
| Outcomes other  than BMI | Other obesity |  |  |
| Population | | | |
| Inclusion criteria | Eligibility included primary obesity based on BMI 95th percentile using age/gender norms from the Centers for Disease Control and Prevention (CDC); self -  identified African-American race/ethnicity; age 12–17 years; and resi- dence in a home w ith a caregiver w illing to participate in treat- ment. | | |
| Exclusion criteria | Exclusion criteria w ere pregnancy and moderate/severe mental retardation, psychosis, or medical co-morbidities requiring treatment. | |  |
| Group  differences | Randomized |  |  |
| Special  populations | African American adolescents |  |  |
|  | Multisystemic therapy (MST) | Control (Shapedow n/SH) | Overall |
| N | 24 | 25 | 49 |
| Sex | 73.9% female | 80% female | 77.1%  female |
| Age | 14.4 | 14.5 | 14.5 |
| Race | 100% African American | 100% African American | 100%  African American |
| BMI | 38.1 | 38.4 | NR |
| Interventions | |  |  |
|  | Multisystemic therapy (MST) | Control (Shapedow n/SH) |  |
| Intervention as described by authors | all participants met for 1 hour w ith a regis- tered dietitian to receive a 1500–1800 kcal diet plan and recommendations for 60 minutes of exercise daily. Families w ere subsequently randomized by the project manager to 6 months of MST | all participants met for 1 hour w ith a regis-tered dietitian to receive a 1500– 1800 kcal diet plan andrecommendations for 60 minutes of exercise daily. Shapedow n[6], a traditional 10-w eek family group w eight managementprogram w ith three follow -up monthly sessions added tomatch  MST treatment length. |  |
| Intervention type | Lifestyle | Lifestyle |  |
| Intervention  length | 6 months | 6 months |  |
| Intensity as  described by authors | 6 months, 2-3 sessions per w eek | 10 w eekly sessions, monthly for 3 more months |  |
| Assigned intensity | 26-51 hours | 5-25 hours |  |
| Provider types | Primary care, nutrition provider, mental health | Primary care, nutrition provider |  |
| Clinic setting | Primary care | Primary care |  |
| Components | Nutrition counseling, activity counseling, motivational  interview ing | Nutrition counseling, activity counseling |  |

| Outcomes |  |  |  |  |
| --- | --- | --- | --- | --- |
| BMI |  |  |  |  |
|  | 7 months |  |  |  |
|  | N | Mean | SD | p (betw een groups) |
| Multisystemic therapy (MST) | 20 | 37.2 | 7.9 | 0.15 |
| Control (Shapedow n/SH) | 22 | 38.4 | 5.7 |  |

**Nemet 2005**

**Short- and long-term beneficial effects of a combined dietary-behavioral-physical activity intervention for the treatment of childhood obesity**

| Study Identification |  |  |  |
| --- | --- | --- | --- |
| Sponsorship source | This w ork w as supported by a grant from the Israeli HeartFund | |  |
| Country | Israel |  |  |
| Methods |  |  |  |
| Design | Randomized controlled trial |  |  |
| Group | Parallel group |  |  |
| IRB | The study w as approved by theinstitutional  review board of the Meir General Hospital. |  |  |
| Outcomes other than BMI | Other obesity, lipids, behaviors |  |  |
| Population |  |  |  |
| Inclusion criteria | obese self-ref erred children and adolescents (6–16years of age) | |  |
| Exclusion criteria | None of the subjectshad an organic cause for his or her obesity, and none of thesubjects received any medication that might interfere w ith grow thor  w eight control (eg, corticosteroids or thyroid hormone). | | |
| Group differences | Randomized |  |  |
|  | Control | Intervention | Overall |
| N | 22 | 24 | 46 |
| Sex | 12/22 male | 14/24 male | 26/46  male |
| Age | 11.3 | 10.9 | NR |
| Race | NR | NR | NR |
| BMI | 27.8 | 28.5 | NR |
| Interventions | |  |  |
|  | Control | Intervention |  |
| Intervention as described by authors | Control subjects w ere ref erred to an ambulatorynutritional consultation at least once and w ere instructed to per-form physical activity  3 times per w eek on their ow n. | Subjects and parents in the intervention group w ere invited together for a series of 4 evening lectures; The participants met w ith the dietitian 6 times during the 3-month program; All intervention subjects participated in a tw ice-w eekly training program (1 hour  per training session) |  |
| Intervention type | Lifestyle | Lifestyle |  |
| Intervention length | 3 months | 3 months |  |
| Intensity as described by authors | Control subjects w ere ref erred to an ambulatorynutritional consultation at least once and w ere instructed to per-form physical activity  3 times per w eek on their ow n. | Subjects and parents in the intervention group w ere invitedtogether for a series of 4 evening lectures. The participants met w ith the dietitian 6 times during the3-month program. All intervention subjects participated in a tw ice-w eekly trainingprogram (1 hour  per training session). |  |
| Assigned intensity | <5 hours | 26-51 hours |  |
| Provider types | Primary care, nutrition provider | Primary care, nutrition provider, exercise |  |
| Clinic setting | Multidisciplinary w eight management program | Multidisciplinary w eight management program |  |
| Components | Nutrition counseling, activity counseling | Nutrition counseling, activity counseling, activity training |  |

| Outcomes |  |
| --- | --- |
| BMI |  |
| 3 months | 1 year |

|  | N | Mean | SD | p (w ithin group) | p (betw een groups) | N | Mean | SD | p (w ithin group) | p (betw een groups) |
| --- | --- | --- | --- | --- | --- | --- | --- | --- | --- | --- |
| Control | 22 | 26.8 | 2.9 | NS | NR | 20 | 28.6 | 5.8 | NS | <0.05 |
| Intervention | 24 | 26.8 | 3.9 | <0.05 |  | 20 | 26.1 | 4.7 |  |  |

**Nemet 2013**

**Effects of a multidisciplinary childhood obesity treatment intervention on adipocytokines, inflammatory and growth mediators**

| Study Identification |  |  |  |
| --- | --- | --- | --- |
| Sponsorship source | This w ork w as supported in part by a grant from the Israeli So-ciety for Clinical Pediatrics. | |  |
| Country | Israel |  |  |
| Methods |  |  |  |
| Design | Randomized controlled trial |  |  |
| Group | Parallel group |  |  |
| IRB | The study w as approved by the institutional review  board of the Meir Medical Center. |  |  |
| Outcomes other than BMI | Other obesity, behaviors, glucose metabolism |  |  |
| Population |  |  |  |
| Inclusion criteria | obese self-ref erred children (aged 6–13 years). only pre- and early pubertal children w ere selected (Tanner stage 1–2 for pubic hair). | |  |
| Exclusion criteria | None of the subjects had an organic cause for obesity, and none of the subjects received any medication that may have interfered w ith grow th or  w eight control (e.g. corticosteroids, thyroid hormone) | | |
| Group differences | Randomized |  |  |
| Special populations | None |  |  |
|  | Control | Intervention | Overall |
| N | 20 | 21 | 41 |
| Sex | 55% female | 48% female | NR |
| Age | 10.49 | 10.41 | NR |
| Race | NR | NR | NR |
| BMI Percentile | 97.5 | 97.3 | NR |
| Interventions | |  |  |
|  | Control | Intervention |  |
| Intervention as described by authors | Control subjects w ere ref erred to an ambulatory nu- tritional consultation at least once, and w ere instructed to perform physical activity at least 3 times per w eek on their ow n. | The participants met w ith the dietitian 6 times during the in-tervention. These meetings differed according to the age of the patients. Intervention subjects participated in a tw ice-w eekly training program (1 h per training session). Children exercised in groups according to age (5–6, 7–9, 10–13 years). Exercise w as done in an age-appropriate manner. The intervention w as designed to mim-ic the type and intensity of exercise that elementary and middle school children normally  perform. All intervention subjects participated in a w eekly 45-min movement  therapy session. |  |
| Intervention type | Lifestyle | Lifestyle |  |
| Intervention length | 3 months | 3 months |  |
| Intensity as described by  authors | At least 1 consultation | Tw ice w eekly for 1 hour, 6 nutrition sessions |  |
| Assigned intensity | <5 hours | 26-51 hours |  |
| Provider types | Primary care, nutrition provider | Primary care, nutrition provider, exercise provider |  |
| Clinic setting | Multidisciplinary w eight management program | Multidisciplinary w eight management program |  |
| Components | Nutrition counseling, activity counseling | Nutrition counseling, activity counseling, activity training |  |

Outcomes

BMI percentile

|  | 3 months |  |  |  |  |
| --- | --- | --- | --- | --- | --- |
|  | n | Mean | SD | p (w ithin group) | p (betw een groups) |
| Control | 20 | 97.7 | 1.9 | NS | <0.01 |
| Intervention | 21 | 96.3 | 2.2 | <0.05 |  |

**Norman, G; Huang, J; Davila, Ep; Kolodziejczyk, Jk; Carlson, J; Covin, Jr; Gootschalk, M; Patrick, K**

**Outcomes of a 1-year randomized controlled trial to evaluate a behavioral 'stepped-down' weight loss intervention for adolescent patients with obesity**

| Study  Identification |  |  |  |
| --- | --- | --- | --- |
| Sponsorship  source | None listed |  |  |
| Country | USA |  |  |
| Methods | | | |
| Design | Randomized controlled trial |  |  |
| Group | Parallel group |  |  |
| IRB | Ethical approval for thestudy w as obtained from participating healthcare organi-zations and from the University of California, San Diego(UCSD) Human  Subjects Review Board. | | |
| Outcomes other  than BMI | Other obesity, blood pressure, lipids, glucose metabolism |  |  |
| Population | | | |
| Inclusion criteria | Adolescents w ith obesity (BMI >95 percentile for age and gender) aged 11–13 years w ere recruited through their primary care providers w ithin three sites of the Children’s Primary Care Medical Group in Chula Vista, California. Participants w ere literate in English, planned to be a San Diego County resident for the next year, had a parent or guardian w illing to participate, w ere w illing to return to the physician office for counselling sessions and could attend measurement  visits. Parents w ere eligible if they w ere literate in English or Spanish | | |
| Exclusion criteria | Adolescents w ere excluded if theyw ere w ithout reliable transportation, taking w eight-alteringmedications w ithin 6 months prior to study initiation, unableto do moderate-to-vigorous PA, more than 300 lb, in fostercare, receiving special needs education, a previous partici-pant in our w eight loss studies, currently enrolled in a w eightloss programme, or diagnosed w ith obesity-related disordersrequiring immediate w eight loss management or diseasesaffecting absorption  or processing of nutrients | | |
| Group  differences | Randomized |  |  |
| Special  populations | sample w as 82% Hispanic |  |  |
|  | Stepped Care | Enhanced Usual Care | Overall |
| N | 53 | 53 | 106 |
| Sex | 29 girls/28 boys | 25 girls/24 boys | 51% female |
| Age | 12.0 girls/12.0 boys | 11.8 girls/11.7 boys | 11.9 |
| Race | girls: 24 (83% Hispanic) Boys 17 (71%) Hispanic | girls 23 (92%)Hispanic; boys 23 (81%) Hispanic | 4% African  American, 2%  Asian/PI, 82%  Hispanic, 7% White,  5% other |
| BMI SDS | girls 2.1 (CI: 1.9, 2.1); boys 2.1 (2.0, 2.3) | girls 2.0 (1.9, 2.2); boys 2.1 (2.0, 2.2) | NR |
| Interventions | |  |  |
|  | Stepped Care | Enhanced Usual Care |  |
| Intervention as described by authors | The intervention follow ed modified recommendations fromthe American Academy of Pediatrics for treatment of child-hood obesity (20) and consisted of three 4- month steps(Fig. 1). The goal w as for adolescents to lose at least 4 lbevery 4 months. If the participant did not meet the goal, thenthe step w as repeated. If a 4- lb w eight loss w as achieved,the participant w as ‘stepped-dow n’ to the next level ofreduced intensity. At the start of the programme, thephysician provided brief counselling on healthy dietary andPA behaviours. If progress is not made, then  follow -up phy-sician visit occurred at month 8 and focused on w eightmanagement  strategies. Face-to-face health educator visitsoccurred monthly in step 1 and bi- | The EUC participants received an initial counselling visit bythe physician, one visit w ith a health educator, materials onhow to improve  w eight-related behaviours, and monthlyfollow -up  mailings on w eight-related issues. |  |

|  | monthly in step 2. hone calls, w hich w ere bi-w eekly in steps 1 and 2, and monthly  in step 3,w ere used toreview progress. |  |
| --- | --- | --- |
| Intervention type | Lifestyle | Lifestyle |
| Intervention  length | 12 months | 12 months |
| Intensity as described by authors | 2 physician visits, montlhy/bimonthly health educator visits, biw eekly/monthly telephone calls. | The EUC participants received an initial counselling visit by the physician, one visit w ith a health educator, materials on how to improve  w eight-related behaviours, and monthly follow -up mailings on w eight-related issues. |
| Assigned  intensity | 5-25 horus | <5 hours |
| Provider types | Primary care, other (health educator) | Primary care, other (health educator) |
| Clinic setting | Primary care | Primary care |
| Components | Nutrition counseling, activity counseling | Nutrition counseling, activity counseling |

| Outcomes |  |  |  |  |  |
| --- | --- | --- | --- | --- | --- |
| BMI (Girls) |  |  |  |  |  |
| 12 months | | | | | |
|  | N | Mean | CI (low er bound) | CI (upper bound) | p (across groups) |
| Stepped Care | 29 | 30.7 | 29.1 | 32.4 | 0.15 |
| Enhanced Usual Care | 25 | 29.1 | 27.4 | 30.9 |  |
| BMI Boys | | | | | |
| 12 months | | | | | |
|  | N | Mean | CI (low er bound) | CI (upper bound) | p (across groups) |
| Stepped Care | 24 | 28.8 | 27.1 | 30.4 | 0.003 |
| Enhanced Usual Care | 28 | 29.5 | 27.9 | 31 |  |
| BMI SDS (Girls) | | | | | |
| 12 months | | | | | |
|  | N | Mean | CI (low er bound) | CI (upper bound) | p (across groups) |
| Stepped Care | 29 | 2 | 1.8 | 2.1 | 0.42 |
| Enhanced Usual Care | 25 | 1.9 | 1.7 | 2.1 |  |
| BMI SDS (Boys) | | | | | |
| 12 months | | | | | |
|  | N | Mean | CI (low er bound) | CI (upper bound) | p (across groups) |
| Stepped Care | 24 | 2 | 1.8 | 2.1 | 0.008 |
| Enhanced Usual Care | 28 | 2.1 | 1.9 | 2.2 |  |

**Nova, A; Russo, A; Sala, E**

**Long-term management of obesity in paediatric office practice: experimental evaluation of two different types of intervention**

| Study  Identification |  |  |  |
| --- | --- | --- | --- |
| Sponsorship  source | There is no organization w ith adirect financial interest in the subject matter discussedin the manuscript | |  |
| Country | Italy |  |  |
| Methods | | | |
| Design | Cluster randomized controlled trial |  |  |
| Group | Parallel group |  |  |
| IRB | Type of inf ormed consent obtained: w e consideredthat a verbal consent for a treatment that does notrequire new experimental drugs or procedures  w assufficient. | |  |
| Outcomes other  than BMI | Behaviors |  |  |
| Population | | | |
| Inclusion criteria | The subjects of this study w ere obese children aged from 3 to 12 years, w ho attended the FP office during the period from 15 November 1997 to  31 March 1998 | | |
| Exclusion criteria | No additional |  |  |
| Group  differences | Cluster randomized, group B more overw eight at baseline. |  |  |
| Special populations | None |  |  |
|  | Group A | Group B | Overall |
| N | 114 | 72 | 186 |
| Sex | 58.4% male | 52.8% male | NR |
| Age | 8.6 | 8.6 | 8.6 |
| Race | NR | NR | NR |
| BMI-based  percentage overw eight | 38.7 | 46 | NR |
| Interventions | |  |  |
|  | Group A | Group B |  |
| Intervention as described by authors | During the first visit, the children and theirparents w ere given the inf ormation leaflets. In groupA, these leaflets contained only general inf ormationregarding obesity and associated risks, generaladvice on healthy eating, and an invitation to practicesome physical activity. | In group B, a specific diet (onlyone scheme suitable in composition and caloric input – approximately 1400 calories – for all theenrolled children), detailed guidelines regarding phys-ical activity and active parental commitment, and analimentary diary w ith instructions for use w ere sup-plied to the children and their families. In group B, the paediatrician also asked the child andhis/her parents if the child w as on a diet. The alimen-tary diary w as review ed by the  paediatrician togetherw ith the child and the parents. |  |
| Intervention type | Lifestyle | Lifestyle |  |
| Intervention  length | 24 months | 24 months |  |
| Intensity as  described by authors | Follow -up visits w ere performed at 6, 12 and24 months in group A | intensively follow ed up at 1, 2.5, 4, 6, 9, 12, 15, 18 and 24 months |  |
| Assigned  intensity | <5 hours | 5-25 hours |  |
| Provider types | Primary care | Primary care |  |
| Clinic setting | Primary care | Primary care |  |

| Components | Nutrition counseling, activity counseling | Nutrition counseling, activity counseling |
| --- | --- | --- |

| Outcomes |  |  |  |  |  |  |  |  |
| --- | --- | --- | --- | --- | --- | --- | --- | --- |
| Percentage overw eight | | | | | | | | |
|  | 6 months |  |  | 12 months | |  |  |  |
|  | N | Mean | SD | p (betw een groups) | N | Mean | SD | p (betw een groups) |
| Group A | 92 | -2.95 | 8.47 | 0.0001 | 80 | -2.92 | 10.8 | 0.002 |
| Group B | 51 | -8.8 | 6.62 |  | 50 | -8.5 | 9.72 |  |

**Novotny, R.; Nigg, C. R.; Li, F.; Wilkens, L. R.**

**Pacific kids DASH for health (PacDASH) randomized, controlled trial with DASH eating plan plus physical activity improves fruit and vegetable intake and diastolic blood pressure in children**

| Study  Identification |  |  |  |
| --- | --- | --- | --- |
| Sponsorship  source | NR but author disclosure is negative: "No competing financial interests exist." |  |  |
| Country | USA |  |  |
| Methods | | | |
| Design | Randomized controlled trial |  |  |
| Group | Parallel group |  |  |
| IRB | The study w as approved by the institutional review boards at KP and the University of Haw aii (Honolulu, HI). | |  |
| Outcomes other  than BMI | Other obesity, blood pressure, behaviors |  |  |
| Population | | | |
| Inclusion criteria | Inclusion criteria for PacDASH included: ages 5–8 years; BMI betw een the 50th and 99th percentile (initially ‡ 85th percentile, expanded to increase enrollment), based on CDC ref erence data 2000 12 ; primary care provider at one of four KP clinics; lives on Oahu; and due for, or scheduled for, a w ell-child/  physical exam visit during months of the study. | | |
| Exclusion criteria | Exclusion criteria w ere: diabetes mellitus, polycystic ovarian syn- drome, gastroesophageal reflux, gallbladder disease, non- alcoholic fatty liver disease,  pseudo tumor cerebri, slipped capital femoral epiphysis, Blount’s disease, obstructive sleep apnea/sleep disturbance, and other chronic disease conditions that w ould affect participation. | | |
| Group  differences | Randomized |  |  |
| Special populations | High minority population (79%) See table below . |  |  |
|  | Treatment | Control | Overall |
| N | 41 | 44 | 85 |
| Sex | 56% female | 86% female | 62% female |
| Age | 7 | 7.1 | 7 |
| Race | 46% Asian, 22% NHPI, 22% w hite, 10% other | 41% Asian, 34% NHPI, 20% w hite, 5% other | 44% Asian,  28% NHPI,  21% w hite,  7% other |
| BMI SDS | 1.3 | 1.4 | 1.3 |
| Interventions | |  |  |
|  | Treatment | Control |  |
| Intervention as defined by authors | The PacDASH intervention w as designed to delivertailored inf ormation to each member of the child, parent,and physician team. The inf ormation w as specifically tai- lored to improve FV intake and PA level of each childbased on his or her stage of readiness to change and self -efficacy.9Children w ere addressed directly, and  parentsassisted children as needed. | Child and parent in the control group received a w el- come letter and attention control mailings on unrelatedhealth topics, such as importance of hand w ashing, sunprotection, and dental hygiene, at 2, 5,  and 8 months. |  |
| Intervention type | Lifestyle | Lifestyle |  |
| Intervention  length | 9 months | 9 months |  |
| Intensity as  described by authors | The trial consisted of a baseline visit w ith study inf or-mational packet and child and  parent ES recommendation/rep orts and tw o subsequent visits, a physician ES recom- mendation/report, three stage-based mailings, and threesupport behavior mailings | Mailings only |  |
| Assigned  intensity | <5 hours | <5 hours |  |

| Provider types | Primary care, research staff | Primary care, research staff |
| --- | --- | --- |
| Clinic setting | Primary care | Primary care |
| Components | Nutrition counseling, activity counseling, other ("Electronic Support System") | Usual care |

| Outcomes |  | | | | | | |
| --- | --- | --- | --- | --- | --- | --- | --- |
| BMI SDS |  |  |  |  |  |  |  |
|  | 6 months (Visit 3)  N | Mean | SE | p (across groups) | 15 months (Visit 5)  N | Mean | SE p (across groups) |
| Treatment | 41 | 1.3 | 0.1 | 0.97 | 41 | 1.4 | 0.1 0.97 |
| Control | 44 | 1.4 | 0.1 |  | 44 | 1.5 | 0.2 |

**O'Connor, Tm; Hilmers, A; Watson, K; Baranowski, T; Giardino, Ap**

**Feasibility of an obesity intervention for paediatric primary care targeting parenting and children: helping HAND**

| Study  Identification |  |  |  |
| --- | --- | --- | --- |
| Sponsorship  source | This w ork is a publication of the US Department of Agriculture(USDA/ARS) Children’s Nutrition Research Center, Depart-ment of Pediatrics, BCM funded  in part by the USDA/ARS(Cooperative Agreement 6250-51000) and the Gillson Longen-baugh Foundation BCM Seed Funds. | | |
| Country | USA |  |  |
| Methods | | | |
| Design | Randomized controlled trial |  |  |
| Group | Parallel group |  |  |
| IRB | Inf ormed w ritten consent w as obtained from families w homet the prescreening criteria follow ed by full screening. All study protocols w ere approved by  the BaylorCollege of Medicine Institutional Review Board. | | |
| Outcomes other  than BMI | Behaviors |  |  |
| Population | | | |
| Inclusion criteria | Study inclusion criteria w ere healthy 5- to8-year-old children w ho w ere overw eight (BMI85%), but notmorbidly obese (BMI<99%) (Barlow 2007); attended  participat-ing Texas Children's Pediatric Associate clinics; and w ere Texas Children's Health Plan members. | | |
| Exclusion criteria | Exclusion criteria included children (1) w ith medical consequences of obesity (such as hypertension or type 2 diabetes) that required more intensive treatment;  (2) on medications that could affect w eight status; (3) w ho had medical problems that could make it difficult to partici- pate in a behaviour change programme;  (4) w ho participated in other w eight treatment programmes; (5) w hose parent w as unable to read or w rite in English or Spanish; or (6) w hose parents participated in formative studies to develop Helping HAND. One child per family w as eligible. | | |
| Group  differences | Randomized |  |  |
| Special  populations | 65% w ith household income $30, 000 or less; 83% Hispanic |  |  |
|  | Intervention (Helping HAND) | Waitlist Control | Overall |
| N | 20 | 20 | 40 |
| Sex | 90% female | 70% female | 80%  female |
| Age | 7 | 6.6 | NR |
| Race | 80% Hispanic, 15% African American, 5% w hite/other | 85% Hispanic, 10% African American, 5% w hite/other | 82.5%  Hispanic |
| BMI Percentile | 95.8 | 95.9 | NR |
| Interventions | |  |  |
|  | Intervention (Helping HAND) | Waitlist Control |  |
| Intervention as described by authors | The HAs met w ith each family individually once a month andw orked w ith the family to self-select one behaviour to targetfrom a menu of behaviours that included: ‘Be more active’,‘Watch less TV’, ‘Eat more fruit’, ‘Eat more vegetables’, ‘Eathealthy snacks’, ‘Drink less sw eet drinks’, ‘Drink more w ater’.Modular Helping HAND w orksheets w ere used to assist thechild in setting behaviour-specific goals and developing animplementation plan to reach the goal by the end of the month. The HA follow ed up w ith the family by telephone 2w eeks after each session to assess progress of goal attainmentand help problem  solve as necessary. Families w ere given theoption to continue to w ork on the same behaviour for 1 addi-tional month or select a new behaviour | Families in the w ait-list CG w ere instructed to see their doctor as regularly scheduled and follow their doctor’s advice and treatment plans (usual paediatric care). They w ere re- contacted after 7 months for post-intervention data collec- tion and to start Helping HAND. They w ere asked to avoid participating in other obesity prevention or treatment pro- grammes during this time. |  |

|  | to target. Families couldreschedule a missed sessions w ithin 2–3 w eeks,  but had to com-plete the programme w ithin 7 months. The HA |  |
| --- | --- | --- |
| Intervention  type | Lifestyle | Usual care |
| Intervention  length | 6 month | 6 month |
| Intensity as described by authors | the HAs at regularly scheduled meetings. The HAs met w ith each family individually once a month and w orked w ith the family to self-select one behaviour to target. The HA follow ed up w ith the family by telephone 2  w eeks after each session to assess progress of goal attainment and help problem solve as necessary.Families could reschedule a missed sessions w ithin 2–3 w eeks, but had to com- plete the programme w ithin 7 months. | Usual care |
| Assigned intensity | 5-25 hours | <5 hours |
| Provider types | Primary care, other (health advisor) | Primary care |
| Clinic setting | Primary care | Primary care |
| Components | Nutrition counseling, activity counseling, motivational interview ing, other  (parenting) | Usual care |

| Outcomes |  |  |  |  |
| --- | --- | --- | --- | --- |
| BMI SDS |  |  |  |  |
| 7-8 months (Time 2) | | | | |
|  | N | Mean | SD | p (betw een groups) |
| Intervention (Helping HAND) | 18 | 1.77 | 0.05 | 0.86 |
| Waitlist Control | 16 | 1.75 | 0.06 |  |

**Parillo, M; Licenziati, Mr; Vacca, M; Marco, D; Iannuzzi, A**

**Metabolic changes after a hypocaloric, low-glycemic-index diet in obese children**

| Study  Identification |  |  |  |
| --- | --- | --- | --- |
| Sponsorship  source | None reported |  |  |
| Country | Italy |  |  |
| Methods | | | |
| Design | Randomized controlled trial |  |  |
| Group | Parallel group |  |  |
| IRB | The study w as in accordance w ith the Ethics Guidelines of our Institutional Committee. Bef ore initiating the study, both parents of all children provided w ritten  inf ormed consent | | |
| Outcomes other  than BMI | Blood pressure, glucose metabolism, lipids |  |  |
| Population | | | |
| Inclusion criteria | Patients in Outpatient Weight Clinic of the Department of Pediatrics, A.Cardarelli Hospital (Naples, Italy), | |  |
| Exclusion  criteria | BMI Z-score <2 and w ere excluded from statistical analyses. None of the children had acute or chronic disease and none w ere on pharmacologic therapy.(not  sure if this w as an exclusion criteria or just a description of w ho entered the study. | | |
| Group  differences | Randomized |  |  |
| Special populations | None |  |  |
|  | High glycemic index (HGI) diet | Low glycemic index (LGI) diet | Overall |
| N | 11 | 11 | 22 |
| Sex | NR | NR | 46%  male |
| Age | 9.8 | 9.5 | NR |
| Race | NR | NR | NR |
| BMI SDS | 2.4 | 2.4 | NR |
| Interventions | |  |  |
|  | High glycemic index (HGI) diet | Low glycemic index (LGI) diet |  |
| Intervention as described by authors | All subjects received a hypocaloric diet that provided an ener-gy intake 30% less than the intake sufficient to maintain the ide-al w eight. The low and high glycemic diets w ere matched formacronutrient composition: fat (25-30%), protein (15-20%), car-bohydrate (50-60%), and fiber intake (0.5 g/kg). The diets pre-scribed w ere based exclusively on natural food  stuffs. The HGI diet had a calculated GI of 90. | All subjects received a hypocaloric diet that provided an ener-gy intake 30% less than the intake sufficient to maintain the ide-al w eight. The low and high glycemic diets w ere matched formacronutrient composition: fat (25-30%), protein (15-20%), car-bohydrate (50-60%), and fiber intake (0.5 g/kg). The diets pre-scribed w ere based exclusively on natural food  stuffs. The LGI diet had a calculated GI of 60, |  |
| Intervention  type | Specific diet | Specific diet |  |
| Intervention  length | 6 months | 6 months |  |
| Intensity as described by authors | Dietary counseling w ith in-struction to recognize carbohydrate-rich foods and lifestyle coun-seling w ere explained by an experienced dietitian to all childrenand at least 1 their parents, in individual sessions, at the begin- ning of the study and after 15 and 30 days..Adherence to the dietary treatment w as assessed monthly on the basis of clinical assessments,  structured interview s and 7-day food records. | Dietary counseling w ith in-struction to recognize carbohydrate-rich foods and lifestyle coun-seling w ere explained by an experienced dietitian to all childrenand at least 1 their parents, in individual sessions, at the begin-ning of the study and after 15 and 30 days.Adherence to the dietary treatment w as assessed monthly on the basis of clinical  assessments, structured interview s and 7-day food records. |  |
| Assigned  intensity | 5-25 hours | 5-25 hours |  |

| Provider types | Nutrition provider | Nutrition provider |
| --- | --- | --- |
| Clinic setting | Multidisciplinary w eight management | Multidisciplinary w eight management |
| Components | Nutrition counseling, activity counseling, specific diet | Nutrition counseling, activity counseling, specific diet |

| Outcomes |  |  |  |  |  |
| --- | --- | --- | --- | --- | --- |
| BMI SDS |  |  |  |  |  |
|  | 6 months |  |  |  |  |
|  | N | Mean | CI (low er bound) | CI (upper bound) | p (across groups) |
| High glycemic index (HGI) diet | 11 | -0.2 | -0.29 | -0.1 | 0.038 |
| Low glycemic index (LGI) diet | 11 | -0.34 | -0.43 | -0.24 |  |
| BMI | | | | | |
|  | 6 months |  |  |  |  |
|  | N | Mean | CI (low er bound) | CI (upper bound) | p (across groups) |
| High glycemic index (HGI) diet | 11 | -1.6 | -2.5 | -0.6 | 0.02 |
| Low glycemic index (LGI) diet | 11 | -3.2 | -4.1 | -2.3 |  |

**Parra-Medina, D; Mojica, C; Liang, Y; Ouyang, Y; Ramos, Ai; Gomez, I**

**Promoting Weight Maintenance among Overweight and Obese Hispanic Children in a Rural Practice**

| Study  Identification |  |  |  |
| --- | --- | --- | --- |
| Sponsorship  source | This project described w as funded by the Centers for Medicare and Medicaid Services (CMS030457) and also supported by the National Ins titutes of Health’s  National Center for Research Resources and the National Center for Advancing Translational Sciences, through Grant 8UL1TR000149. | | |
| Country | USA |  |  |
| Methods | | | |
| Design | Randomized controlled trial |  |  |
| Group | Parallel group |  |  |
| IRB | The study protocol w as approved by The University of Texas Health Science Center at San Antonio (UTHSCSA; San Antonio, TX) Institutional Review Board  bef ore participant recruitment. | | |
| Outcomes other  than BMI | Other obesity |  |  |
| Population | | | |
| Inclusion criteria | met all criteria: (1) w ere Hispanic based on parent self-report; (2) 5–14 years of age; (3) overw eight (BMI betw een the 85th and 95th percentile for age and gender) or obese (BMI ‡ 95th percentile for age and gender); (4) one parent or adult caregiver w ho resided w ith the participant had to agree to participate in  intervention and evaluation activities; and (5) parent had access to a telephone. | | |
| Exclusion  criteria | Had one of the follow ing: (1) a mental, emotional, or physical handicap identified by a parent or provider that may interfere w ith study participation; (2) a  diagnosis of cardiovascular, pulmonary, or digestive disease; or (3) planning to move from the local area w ithin the time span of the study | | |
| Group  differences | Randomized |  |  |
| Special  Population | Hispanic |  |  |
|  | Standard Care | Intervention | Overall |
| N | 61 | 57 | 118 |
| Sex | 45.9% male | 33.3% male | 39.8%  male |
| Age | 9.92 | 9.4 | 9.67 |
| Race | 100% Hispanic | 100% Hispanic | 100%  Hispanic |
| BMI | 26.64 | 27.15 | 26.89 |
| Interventions | |  |  |
|  | Standard Care | Intervention |  |
| Intervention as described by authors | Healthy Lifestyle Prescription (HLP) from their clinical provider. The HLP lists 11 healthy lifestyle strategies (i.e. eat breakfast every day, play outside 1 hour a day) that are recommended in the prevention plus stage for the pre- vention and treatment of childhood obesity. A computerized algorithm w as applied to self -reported behavioral data collected at baseline to identify the most appropriate healthy lifestyle behavioral strategies for each family. | Parents and children assigned toINT received all elements of SC, plus face-to-face coun-seling, telephone counseling, and new sletters. NT participants received one30-minute, face-to-face counseling session at the clinicw ith a masters-level health educator immediately aftervisit 1. The face-to-face counseling session targeted thef amily and included at least the child and parent. INT parents also received monthlytelephone counseling calls (approximately 15 minuteseach) from the health educator. INT parents and children also received fourmonthly bilingual  (English and Spanish) new sletters. |  |
| Intervention type | Lifestyle | Lifestyle |  |
| Intervention  length | 18 w eeks | 18 w eeks |  |

| Intensity as  described by authors | 4 clinic visits | 4 clinic visits, 1 counseling session, 4 calls |
| --- | --- | --- |
| Assigned  intensity | <5 hours | <5 hours |
| Provider types | Primary care | Primary care, other (research nurse, health educator) |
| Clinic setting | Primary care | Primary care |
| Components | Nutrition counseling, activity counseling | Nutrition counseling, activity counseling |

| Outcomes |  |  |  |
| --- | --- | --- | --- |
| Percent w ith zBMI decrease or zero | | | |
| 18 w eeks | | | |
|  | N | Mean | P (betw een groups) |
| Standard Care | 61 | 55.7 | 0.46 |
| Intervention | 57 | 63.2 |  |

**Partsalaki, I; Karvela, A; Spiliotis, Be**

**Metabolic impact of a ketogenic diet compared to a hypocaloric diet in obese children and adolescents**

| Study  Identification |  |  |  |
| --- | --- | --- | --- |
| Sponsorship  source | None reported |  |  |
| Country | Greece |  |  |
| Methods | | | |
| Design | Randomized controlled trial |  |  |
| Group | Parallel group |  |  |
| IRB | The protocol w as approved by the Ethics Committee of the University Hospital of Patras. Inf ormed parental consent and children ’ s assent w ere obtained in all  cases | | |
| Outcomes other  than BMI | Other obesity, glucose metabolism, lipids, blood pressure, other labs |  |  |
| Population | | | |
| Inclusion criteria | Fifty-eight obese [ > 95th percentile body mass index (BMI) for gen-der and age] (24, 25) children and adolescents (aged 8 – 18). The inclusion criteria speci-fi ed that all subjects w ere not follow ing any specialized diet and had normal liver, respiratory, kidney, and gastrointestinal functions. All children w ith thyroid dysfunction w ere on treatment w ith thyroxine and w ere euthyroid during the entire study. Individuals w ith diabetes or genetically associated obesity  syndromes w ere excluded from the study | | |
| Exclusion  criteria | No additional |  |  |
| Group  differences | Randomized |  |  |
| Special  populations | None |  |  |
|  | Ketogenic diet | Hypocaloric diet | Overall |
| N | 29 | 29 | 58 |
| Sex | 48% male | 45% male | NR |
| Age | 13.6 | 12.3 | NR |
| Race | NR | NR | NR |
| BMI | 20.8 | 28 | NR |
| Interventions | |  |  |
|  | Ketogenic diet | Hypocaloric diet |  |
| Intervention as described by authors | The ketogenic diet group aimed for < 20 g/day carbohydrates, w ith a gradual increase tow ards 30 – 40 g/day, if the measurements of urinary ketones continued to indicate ketosis. There w ere no restrictions on caloric intake or the type of fat or cholesterol concentration of the foods. Both groups w ere encouraged to have at  least 1 h daily of vigor-ous exercise. | The children and adolescents on the hypocaloric diet w ere instructed to reduce their caloric intake by 500 calories daily w hile deriving 28 % – 33  % and 50 % – 55 % of these calories from fat and carbohy- drates, respectively, w hich is in accordance w ith the dietary guide-lines for children and adolescents of the American Heart Association. Both groups  w ere encouraged to have at least 1 h daily of vigor-ous exercise. |  |
| Intervention type | Specific diet | Specific diet |  |
| Intervention  length | 6 months | 6 months |  |
| Intensity as  described by authors | The dietitian met w ith them individually at baseline and w eekly for the fi  rst month and biw eekly thereafter in order for the appropriate education and counseling on the diets to take place. | The dietitian met w ith them individually at baseline and w eekly for the fi rst  month and biw eekly thereafter in order for the appropriate education and counseling on the diets to take place. |  |
| Assigned intensity  Provider types | 5-25 hours  Specialist, nutrition provider | 5-25 hours  Specialist, nutrition provider |  |
| Clinic setting | Specialty clinic | Specialty clinic |  |

Components Nutrition counseling, activity counseling, specific diet Nutrition counseling, activity counseling, specific diet

BMI

Outcomes

6 months

N Mean SD p (w ithin group) p (betw een groups)

| Ketogenic diet | 21 | -3.7 | 0.001 | NS |
| --- | --- | --- | --- | --- |
| Hypocaloric diet | 17 | -3.3 | 0.001 |  |

**Pedrosa, C; Oliveira, Bm; Albuquerque, I; SimÃµes-Pereira, C; Vaz-de-Almeida, Md; Correia, F**

**Markers of metabolic syndrome in obese children before and after 1-year lifestyle intervention program**

| Study  Identification |  |  |  |
| --- | --- | --- | --- |
| Sponsorship  source | This w ork w as supported by a SPEDM (Sociedade Portuguesa de  Endocrinologia, Diabetes e Metabolismo)/ ABBOTT grant. |  |  |
| Country | Portugal |  |  |
| Methods | | | |
| Design | Randomized controlled trial |  |  |
| Group | Parallel group |  |  |
| IRB | Each parent gave w ritten inf ormed consent, and children gave assent for participation. Assessments w ere done at the Department of Endocrinol-  ogy, Diabetes and Nutrition. The study w as approved by the Hospital Ethics Committee. | | |
| Outcomes other  than BMI | Other obesity, blood pressure, glucose metabolism, lipids, behaviors |  |  |
| Population | | | |
| Inclusion criteria | > 85th BMI percentile, children, seems to be focused on below 10 year olds but not listed as inclusion specif ically. | |  |
| Exclusion  criteria | None of the children had primary dyslipidemia, hypertension, diabetes or glucose intoler- ance, secondary obesity, and w ere not receiving  pharma- cological treatment. | | |
| Group  differences | randomized |  |  |
| Special Population | None |  |  |
|  | Individual conventional treatment (IT) | Group-based treatment (GT) | Overall |
| Age | NR | NR | 8.6 (0.7SD) |
| Sex | NR | NR | 55.7%  Male/44.3%  Female; n=61 |
| Race | NR | NR | NR |
| BMI SDS |  | 1.86 (0.25SD) | 1.93 (0.28SD) |
| Interventions | |  |  |
|  | Individual conventional treatment (IT) | Group-based treatment (GT) |  |
| Intervention as defined by the author | In IT, a healthy eating plan meeting nutrient needs according to the recommended daily allow ance (&1,800 kcal) w as prescribed and explained to children and their parents. The diet recommended the reduced intake of refined carbohydrates and saturated fats, w ith an increased consumption of vegetables and fruits. Additionally, physical activity w as encouraged and sedentary behaviors, such as TV  w atching and computer/video game playing, w ere discouraged | In GT, children and their parents participated in a group-based nutrition education program (4 children per group), w hich consisted of 4 consecutive sessions each of 60 min duration, conducted by a nutritionist. These sessions covered several topics regarding childhood obesity and comorbidities, healthy eating habits, healthy cooking methods, portion size control, food labeling and physical  activity promotion. |  |
| Intervention  type | Lifestyle | Lifestyle |  |
| Intervention  length | 1 year | 1 year |  |
| Intensity as described by authors | One baseline visit w here diet w as prescribed. Follow -up visits w ere held at 3- and 6 months and 1 year after the first visit. | In GT, children and their parents participated in a group-based nutrition education program (4 children per group), w hich consisted of 4 consecutive sessions each of 60 min duration, conducted by a nutritionist. The acquired know ledge w as reinf orced at each session and w henever necessary at follow -up visits that w ere held at 3- and  6 months and 1 year after the first visit. |  |

| Assigned  intensity | < 5 hours | 5-25 hours |
| --- | --- | --- |
| Provider type | Nutrition provider | Nutrition provider |
| Clinic setting | research unit | research unit |
| Components | Nutrition counseling, Activity counselling | nutrition counseling; activity counseling |

| Outcomes |  |  |  |  |  |  |  |  |
| --- | --- | --- | --- | --- | --- | --- | --- | --- |
| BMI z-score |  |  |  |  |  |  |  |  |
|  | 6 month |  |  |  | 1 year |  |  |  |
|  | N | Mean | SD | P Value | N | Mean | SD | P Value |
| Individual conventional treatment (IT) | 42 | 1.83 | 0.34 | NR | 42 | 1.78 | 0.33 | 0.582 |
| Group-based treatment (GT) | 19 | 1.73 | 0.35 |  | 19 | 1.61 | 0.34 |  |
| BMI | | | | | | | | |
|  | 6 month |  |  |  | 1 year |  |  |  |
|  | N | Mean | SD | P Value | N | Mean | SD | P Value |
| Individual conventional treatment (IT) | 42 | 23.08 | 2.69 | NR | 42 | 23.39 | 2.77 | 0.579 |
| Group-based treatment (GT) | 19 | 22.28 | 1.75 |  | 19 | 22.14 | 1.81 |  |

**Quattrin, T.; Roemmich, J. N.; Paluch, R.; Yu, J.; Epstein, L. H.; Ecker, M. A.**

**Efficacy of family-based weight control program for preschool children in primary care**

| Study Identification |  |  |  |
| --- | --- | --- | --- |
| Sponsorship source | Supported by National Institutes of Health grant1R01HD053 773-01. Funded by the National Institutes of Health(NIH). | |  |
| Country | USA |  |  |
| Methods |  |  |  |
| Design | Randomized controlled trial |  |  |
| Group | Parallel group |  |  |
| IRB | The study w as approved by the In-stitutional Review Boards of the Womenand Children’sHospitalof Buffaloandthe University at Buffalo and w as con-ducted  in accordance w ith the Declara-tion of Helsinki. | | |
| Outcomes other  than BMI | None |  |  |
| Population |  |  |  |
| Inclusion criteria | Girls and boys aged 2 to 5 years w ith BMI > (or equal to) 85th percentile for age and gender, w ith normal developmental milestones and having 1  participating parent w ith a BMI > (or equal to) 27. Participating parents had to be w illing to attend all treatment sessions, speak English or Spanish at a fifth- grade level, and continue care for their child at the same pediatric practice throughout the study. | | |
| Exclusion criteria | Exclusion criteria included child’s height below 2 SD from the mean for age and gender or pathologic grow th velocity, history of small for gestational age, medications know n to affect w eight, and child or parent w ith psychiatric/eating disorder or a pathology preventing performance of physical activity. Families w ere also excluded if the participating mother w as pregnant or planning a pregnancy, if parents w ere acquainted w ith the family of a child enrolled in the  program, or the child’s family resided w ithin .5 miles from another participating child. | | |
| Group differences | Randomized |  |  |
| Special populations | Preschool children |  |  |
|  | Intervention | Inf ormation Control (IC) | Overall |
| N | 46 | 50 | 96 |
| Sex | 67% female | 66% female | NR |
| Age | 4.6 | 4.4 | NR |
| Race | 72% w hite, 15% black, 11% Hispanic, 2% Asian | 74% w hite, 8% black, 8% Hispanic, 10% other | NR |
| BMI SDS | 2.2 | 2.1 | NR |
| Interventions | |  |  |
|  | Intervention | Inf ormation Control (IC) |  |
| Intervention as  described by authors | Trained staff delivered dietary and physical/sedentary activities education to parents  over 6 months (10 group meetings and 8 calls). Parents in the intervention also received individualized behavioral modification. | Trained staff delivered dietary and physical/sedentary  activities education to parents over 6 months (10 group meetings and 8 calls). |  |
| Intervention type | Lifestyle | Lifestyle |  |
| Intervention length | 6 months | 6 months |  |
| Intensity as  described by authors | Ten 60-minute sessions over 6 months, 8 phone calls betw een meetings. Bef ore or after the group sessions parents attended a 1:1 meeting w ith an assigned coach | Ten 60-minute sessions over 6 months, 8 phone calls betw een meetings |  |
| Assigned intensity | 5-25 hours | 5-25 hours |  |
| Provider types | Primary care, other ("coach") | Primary care, other ("coach") |  |
| Clinic setting | Primary care | Primary care |  |
| Components | Nutrition counseling, activity counseling, motivational interview ing, other (parenting) | Nutrition counseling, activity counseling |  |

| Outcomes |  |
| --- | --- |
| BMI SDS |  |
| 3 months | 6 months |

|  | N | Mean | SD | p (betw een groups) | N | Mean | SD | p (betw een groups) |
| --- | --- | --- | --- | --- | --- | --- | --- | --- |
| Intervention | 46 | 1.87 |  | <0.02 | 46 | 1.72 |  | <0.001 |
| Inf ormation Control (IC) | 50 | 2.01 |  |  | 50 | 1.98 |  |  |

**Quattrin, T; Cao, Y; Paluch, Ra; Roemmich, Jn; Ecker, Ma; Epstein, Lh Cost-effectiveness of family-based obesity treatment**

| Study  Identification |  |  |  |
| --- | --- | --- | --- |
| Sponsorship  source | This research w as funded by the National Institutes of Health grant 1R01HAD053773-01, Principal Investigator, Teresa Quattrin. Funded by the National  Institutes of Health (NIH). | |  |
| Country | USA |  |  |
| Methods | | | |
| Design | Randomized controlled trial |  |  |
| Group | Parallel group |  |  |
| IRB | The study w as approved by the institutional review board of the Women and Children’s Hospital of Buffalo and w as conducted in concordance w ith the  Declaration of Helsinki. | |  |
| Outcomes  other than BMI | BMI, Other (parent BMI) |  |  |
| Population | | | |
| Inclusion  criteria | Children w ho had a BMI over the 85th percentile for their age and sex w ith a parent w ho had a BMI ≥25 w ere included. | |  |
| Exclusion  criteria | The main exclusion criteria w ere as follow s: small for gestational age, short stature, and child and/or parent inability to perform physical activity. | |  |
| Group  differences | Randomized |  |  |
| Special  Populations | 2 to 5 year olds |  |  |
|  | IC | FBT | Overall |
| Age | 4.4 (0.2) | 4.6 (0.2) | NR |
| Sex | 33F/15M | 31F/15M | NR |
| Race | 13Minoriity/37Caucasian | 13Minority/33Caucasian | NR |
| BMI | 20.1 (0.4) | 20.4 (0.5) | NR |
| %OBIM | 29.8 (17.1) | 32.4 (22.4) | NR |
| Interventions | |  |  |
|  | IC | FBT |  |
| Intervention as defined by author | Child only focus, w ith child ta all sessions and dietary counselling for the child | Behavior modification and education on parenting techniques w ere delivered by the group leader during group sessions and by the PEA, assigned as a health coach to each family, during brief individual  sessions. |  |
| Intervention  type | Life style | Life style |  |
| Intervention  length | 12 months | 12 months |  |
| Intensity as described by authors | Parents attended 16 treatment meetings. During the 12-month treatment period there w ere 13 group sessions (4 w eekly, 2 biw eekly, 4 monthly, and 3 at 8- to 10-w eek intervals), and during the follow -up period there  w ere 3 group sessions (w eeks 65, 78, and 91). These w ere follow ed by a final visit for assessment only at w eek 104, so that there w ere a total of 17 visits to the pediatrician’s office. PEA, assigned to each family and  ref erred to as a health coach, telephoned the parent betw een scheduled meetings (10 times during treatment and 3 times during follow -up) to remind him or her of the upcoming meeting in the IC group and to counsel and problem solve in the FBT group | Parents attended 16 treatment meetings. During the 12-month treatment period there w ere 13 group sessions (4 w eekly, 2 biw eekly, 4 monthly, and 3 at 8- to 10-w eek intervals), and during the follow -up period there  w ere 3 group sessions (w eeks 65, 78, and 91). These w ere follow ed by a final visit for assessment only at w eek 104, so that there w ere a total of 17 visits to the pediatrician’s office. PEA, assigned to each family and  ref erred to as a health coach, telephoned the parent betw een scheduled meetings (10 times during treatment and 3 times during follow -up) to remind him or her of the upcoming meeting in the IC group and to counsel and problem solve in the FBT group |  |

| Assigned  intensity | 5-25 hours | 5-25 hours |
| --- | --- | --- |
| Provider | primary care, health coach | primary care, health coach |
| Clinic Setting | primary care | primary care |
| Components | nutrition counseling, activity counseling | nutrition counseling, activity counseling, parent as an added focus in  nutrition and activity counseling, parent training, parent monitoring |

| Outcomes |  |  |  |  |  |  |  |
| --- | --- | --- | --- | --- | --- | --- | --- |
| %0BMI |  |  |  |  |  |  |  |
| Changes over 24 months | | | | | | | |
|  | n | Mean | 95% CI upper | 95% CI low er | Effect | Effect 95% CI upper | Effect 95% CI low er |
| IC | 50 | -4.4 | -8.9 | -2.2 | 6.4 | 0.7 | 9.2 |
| FBT | 46 | 2 | -3.6 | 3.4 |  |  |  |

**Quattrin, T; Roemmich, Jn; Paluch, R; Yu, J; Epstein, Lh; Ecker, Ma**

**Treatment outcomes of overweight children and parents in the medical home**

| Study  Identification |  |  |  |
| --- | --- | --- | --- |
| Sponsorship  source | Supported by National Institutes of Health grant 1R01HD053773-01, Principal Investigator, Teresa Quattrin. Funded by the National Institutes of Health(NIH). | | |
| Country | USA |  |  |
| Methods | | | |
| Design | Randomized controlled trial |  |  |
| Group | Parallel group |  |  |
| IRB | The study w asapproved by the Institutional Review Board of the Women and Children’sHospital of Buffalo and w as conductedin concordance w ith the  Declaration of Helsinki. | |  |
| Outcomes other  than BMI | None |  |  |
| Population | | | |
| Inclusion criteria | Children w ho had a BMI over the 85thpercentile for age and gen-der and having a parent w ho had a BMI.25 kg/m2w ere included. | |  |
| Exclusion  criteria | The main ex-clusion criteria w ere: small for gesta-tional age, short stature, and child/parent inability to perform physical ac-tivity. | |  |
| Group  differences | Randomized |  |  |
| Special populations | Preschool children |  |  |
|  | Intervention | Inf ormation Control (IC) | Overall |
| N | 46 | 50 | 96 |
| Sex | 67% female | 66% female | NR |
| Age | 4.6 | 4.4 | NR |
| Race | 72% w hite, 15% black, 11% Hispanic, 2% Asian | 74% w hite, 8% black, 8% Hispanic, 10% other | NR |
| BMI SDS | 2.2 | 2.1 | NR |
| Interventions | |  |  |
|  | Intervention | Inf ormation Control (IC) |  |
| Intervention as described by authors | Parents attended thirteen 60-minute groupsessions over the 12-month treat-ment period (4 w eekly, 2 biw eekly, 4monthly, and 3 at 8- to 10- w eek intervals),follow ed by a 12-month follow -up(3 meetings at month 16, 20, and 24). A PEA assigned to eachf amily telephoned the parent betw eenscheduled meetings 10 times duringtreatment and 3 times during follow -up. Bothgroups received dietary, physical, andsedentary activity guidelines in keepingw ith the Expert Committee Recom-  mendations. In the Intervention behavior modificationand education on parenting techniques(ie, positive reinf orcement, modelinghealthy diet and activity, and stimuluscontrol) w ere delivered by the groupleader during the group meetings and bya PEA, assigned to each family, duringbrief individual sessions held the sameevenings as the group  meetings. | Parents attended thirteen 60-minute groupsessions over the 12-month treat-ment period (4 w eekly, 2 biw eekly, 4monthly, and 3 at 8- to 10- w eek intervals),follow ed by a 12-month follow -up(3 meetings at month 16, 20, and 24). A PEA assigned to eachf amily telephoned the parent betw eenscheduled meetings 10 times duringtreatment and 3 times during follow -up. Bothgroups received dietary, physical, andsedentary activity guidelines in keepingw ith the Expert Committee Recom- mendations |  |
| Intervention type | Lifestyle | Lifestyle |  |
| Intervention  length | 12 months | 12 months |  |

| Intensity as  described by authors | 13 60-min groups sessions, 3 meetings at months 16, 20, 24. 13 phone calls, | 13 60-min groups sessions, 3 meetings at months 16, 20, 24. 13 phone calls, |
| --- | --- | --- |
| Assigned  intensity | 5-25 hours | 5-25 hours |
| Provider types | Primary care, nutrition provider | Primary care |
| Clinic setting | Primary care | Primary care |
| Components | Nutrition counseling, activity counseling, other (parenting) | Nutrition counseling, activity counseling |

| Outcomes |  |  |  |  |  |  |  |  |
| --- | --- | --- | --- | --- | --- | --- | --- | --- |
| BMI SDS |  |  |  |  |  |  |  |  |
| 18 months | |  |  | 24 months | |  |  |  |
|  | N | Mean | SD | p (betw een groups) | N | Mean | SD | p (betw een groups) |
| Intervention | 46 | 1.66 | 0.06 | 0.005 | 46 | 1.61 | 0.06 | 0 .001 |
| Inf ormation Control (IC) | 50 | 1.86 | 0.05 |  | 50 | 1.86 | 0.05 |  |

**Resnicow, K; McMaster, F; Bocian, A; Harris, D; Zhou, Y; Snetselaar, L; Schwartz, R; Myers, E; Gotlieb, J; Foster, J; Hollinger, D; Smith, K; Woolford, S; Mueller, D; Wasserman, Rc**

**Motivational interviewing and dietary counseling for obesity in primary care: an RCT**

| Study  Identification |  |  |  |  |
| --- | --- | --- | --- | --- |
| Sponsorship  source | Supported by a grant (HL085400) from the US National Institutes of Health National Heart, Lung, and Blood Institute. T | | |  |
| Country | USA |  |  |  |
| Methods | | | | |
| Design | Cluster randomized  controlled trial |  |  |  |
| Group | Parallel group |  |  |  |
| IRB | Ethics approval w as obtained from the University of Michigan and the American Academy of Pediatrics (AAP). Most PROS (Pediatric Research in Office Settings) practices (n = 38) operated under the AAP Institutional Review Board, w hereas the remaining practices (n = 4), obtained local institutional review  board approval. | | | |
| Outcomes other  than BMI | None |  |  |  |
| Population | | | | |
| Inclusion  criteria | The target population w as children aged 2 to 8 w ith a BMI 85th and 97th percentile. | |  |  |
| Exclusion criteria | Exclusion criteria w ere type 1 or type 2 diabetes, non-English-speaking parent, no w orking telephone, chronic medical disorders, chromosomal disorders, syndromes and nonambulatory conditions (such as myelodysplasia, cerebral palsy), medications know n to affect grow th, enrollment in a w eight loss program,  or seen by w eight loss specialist in past 12 months. | | | |
| Group  differences | Cluster randomized, but some baseline differences in race, income, education | |  |  |
| Special  populations | 2 to 8 year olds |  |  |  |
|  | Group 1 (Usual care) | Group 2 (PCP) | Group 3 (PCP + RD) | Overall |
| N | 198 | 212 | 235 | 645 |
| Sex | 47.0% male | 42.9% male | 39.6% male | 43.0% male |
| Age | 4.9 | 5.1 | 5.3 | 5.1 |
| Race | 67.9% w hite, 2.6%  black, 13.3%  Hispanic, 6.6% Asian,  9.7% other | 53.6% w hite, 11.0% black, 30.1% Hispanic, 1.4% Asian,  3.8% other | 59.1% w hite, 6.1% black, 20.9% Hispanic, 8.7%  Asian, 5.2% other | 60.0%w hite, 6.6%  black, 21.6%  Hispanic, 5.7%  Asian, 6.1% other |
| BMI Percentile | 91.5 | 92.2 | 92.1 | 91.9 |
| Interventions | |  |  |  |
|  | Group 1 (Usual care) | Group 2 (PCP) | Group 3 (PCP + RD) |  |
| Intervention as described by authors | Usual care and half day orientation on current treatment guidelines, handouts  for patients | 2 day training of MI and behavior therapy, and an interactive DVD. PCPs in group 2 w ere asked to schedule 3 counseling sessions w ith a parent of the index child in year 1 and 1 additional “booster” visit in year 2, although  they w ere given latitude in their appointment scheduling. | Group 3 (PCP+RD) included the same interventioncomponents as group 2 but addedMI- based counseling from a trained RD w ho w as linked to the practice. The RD sessions  w eredelivered either in-person or bytelephone. |  |
| Intervention  type | Usual care | Lifestyle | Lifestyle |  |
| Intervention  length | 2 years | 2 years | 2 years |  |

| Intensity as described by authors | Usual care | PCPs in group 2 w ere asked toschedule 3 counseling sessions w itha parent of the index child in year 1and 1 additional“booster”visit inyear 2, although they w ere  givenlatitude in their appointmentscheduling. | 6 MI-based counseling sessions over 2 years. |
| --- | --- | --- | --- |
| Assigned  intensity | <5 hours | <5 hours | <5 hours |
| Provider types | Primary care | Primary care | Primary care, nutrition provider |
| Clinic setting | Primary care | Primary care | Primary care |
| Components | Usual care | Nutrition counseling, activity counseling, motivational  interview ing | Nutrition counseling, activity counseling,  motivational interview ing |

| Outcomes |  |  |  |  |
| --- | --- | --- | --- | --- |
| BMI Percentile |  |  |  |  |
|  | 2 years |  |  |  |
|  | N | Mean | SE | p (across groups) |
| Group 1 (Usual care) | 158 | -1.8 | 0.98 | p<0.05 vs group 3 |
| Group 2 (PCP) | 145 | -3.8 | 0.96 | NS |
| Group 3 (PCP + RD) | 154 | -4.9 | 0.99 |  |

**Rifas-Shiman, Sl; Taveras, Em; Gortmaker, Sl; Hohman, Kh; Horan, Cm; Kleinman, Kp; Mitchell, K; Price, S; Prosser, La; Gillman, Mw Two-year follow-up of a primary care-based intervention to prevent and manage childhood obesity: the High Five for Kids study**

| Study Identification |  |  |  |
| --- | --- | --- | --- |
| Sponsorship source | This study w as supported by a grant from the EuniceKennedy Shriver National Institute of Child Health andHuman Development (R01 HD 050966) | | |
| Country | USA |  |  |
| Methods |  |  |  |
| Design | Cluster randomized controlled trial |  |  |
| Group | Parallel group |  |  |
| IRB | The institutional review board of Harvard Pilgrim Health Care approved all study procedures. |  |  |
| Outcomes other than  BMI | Behaviors |  |  |
| Population |  |  |  |
| Inclusion criteria | children age 2 – 6years w ith BMI ≥ 95th percentile or 85th to < 95th percentile if at least one parent w as overw eight | |  |
| Exclusion criteria | No additional |  |  |
| Group differences | Cluster randomized, more w hite in the usual care group |  |  |
| Special populations | Preschoolers |  |  |
|  | Intervention | Usual Care | Overall |
| N | 253 | 192 | 445 |
| Sex | 47.8% female | 49.0% female | 48.3% female |
| Age | 4.8 | 5.2 | 4.9 |
| Race | 46.6% w hite, 27.7% black, 19.0% latino, 6.7% other | 69.8% w hite, 7.3%  black, 13.5% latino,  9.4% other | 56.6% w hite, 18.9%  black, 16.6% latino,  7.9% other |
| BMI SDS | 1.88 | 1.82 | 1.85 |
| Interventions | |  |  |
|  | Intervention | Usual Care |  |
| Intervention as described by authors | Inter-vention practices received primary care restructuring,and families received motivational  interview ing byclinicians and educational modules targeting televi-sion view ing and intakes of fast food and sugar-sw eetened beverages. | Usual Care |  |
| Intervention type | Lifestyle | Usual care |  |
| Intervention length | 12 months (+12 months maintenance) | 12 months |  |
| Intensity as described by authors | During the 1-year interventionperiod, w e aimed for participants to complete four in-person visits and tw o phone calls w ith clinicians. Du-ring the subsequent 1-year maintenance period, w eaimed for  participants to complete tw o in-person in-tervention visits. | Usual care |  |
| Assigned intensity | <5 hours | <5 hours |  |
| Provider types | Primary care | Primary care |  |
| Clinic setting | Primary care | Primary care |  |
| Components | Nutrition counseling, activity counseling, motivational interview ing | Usual care |  |

| Outcomes |  |  |  |
| --- | --- | --- | --- |
| BMI SDS |  |  |  |
| 2 years |  |  |  |
| N | Mean | SD | p (betw een groups) |

| Intervention | 249 | -0.2 | 0.51 | NS |
| --- | --- | --- | --- | --- |
| Usual Care | 192 | -0.18 | 0.47 |  |
| BMI |  |  |  |  |
|  | 2 years |  |  |  |
|  | N | Mean | SD | p (betw een groups) |
| Intervention | 249 | 1.11 | 1.99 | NS |
| Usual Care | 192 | 1.22 | 1.82 |  |

**Rolland-Cachera, Mf; Thibault, H; Souberbielle, Jc; SouliÃ©, D; Carbonel, P; Deheeger, M; Roinsol, D; Longueville, E; Bellisle, F; Serog, P Massive obesity in adolescents: dietary interventions and behaviours associated with weight regain at 2 y follow-up**

| Study  Identification |  |  |  |
| --- | --- | --- | --- |
| Sponsorship  source | This study w as supported by LESIEUR and NESTLE FranceCompanies |  |  |
| Country | France |  |  |
| Methods | | | |
| Design | Randomized controlled trial |  |  |
| Group | Parallel group |  |  |
| IRB | The Ethical Committee for the protection of persons participating in biological experimentation of Hospital Paris Saint-Louis approved the protocol and  parents gave consent allow ing the child to participate in the study | | |
| Outcomes other  than BMI | Other obesity, behaviors |  |  |
| Population | | | |
| Inclusion criteria | The inclusion criteria w ere the follow ing: a body mass index(BMI) exceeding the 97th centile of the French ref erencevalues,11age betw een 11 and 16 y,  no pathologies contribut-ing to obesity and no use of regular medication | | |
| Exclusion  criteria | No additional |  |  |
| Group  differences | Randomized |  |  |
| Special  populations | Severe obesity |  |  |
|  | PROT- | PROT+ | Overall |
| N | 61 | 60 | 121 |
| Sex | 74% female | 72% female | 74%  female |
| Age | 14.1 | 14.4 | NR |
| Race | NR | NR | NR |
| BMI SDS | 4.29 | 4.27 | NR |
| Interventions | |  |  |
| Intervention as | PROT-  The participants lived for one school year in a medical centre(also boarding school) specialised in the treatment of obesechildren. The treatment included diet, physical exercise andpsychological support. The nutrient content of the PROTdiet w as 15% proteinand 54% CHO. | PROT+  The participants lived for one school year in a med boarding school) specialised in the treatment of treatment included diet, physical exercise andps The nutrient content of the PROT+ diet w as 19% | ical centre(also obesechildren. The ychological support. proteinand 50% CHO. |
| described by  authors  Intervention type Intervention | Physical activityPhysical activity consisted in 7 h/w eek of vigorous sports(sw imming, tennis, handball, aerobic) and 7 h/w eek  of outdoor activities (such as w alking or playing). Childrenhad no possibility to w atch TV in the centre.  Lifestyle, specific diet  9 months | Physical activityPhysical activity consisted in 7 sports(sw imming, tennis, handball, aerobic)  of outdoor activities (such as w alking or playing possibility to w atch TV in the centre.  Lifestyle, specific diet  9 months | h/w eek of vigorous and 7 h/w eek  ). Childrenhad no |
| length Intensity as described by  authors | Inpatient for 9 months | Inpatient for 9 months |  |
| Assigned  intensity | 52+ hours | 52+ hours |  |

| Provider types | Primary care, nutrition provider, mental health, exercise | Primary care, nutrition provider, mental health, exercise |
| --- | --- | --- |
| Clinic setting | Inpatient | Inpatient |
| Components | Nutrition counseling, activity counseling, nutrition training, activity  training, mental health | Nutrition counseling, activity counseling, nutrition training, activity  training, mental health |

| Outcomes |  |  |  |  |  |  |  |  |
| --- | --- | --- | --- | --- | --- | --- | --- | --- |
| BMI |  |  |  |  |  |  |  |  |
| 11 months (T4) | |  |  | 35 months (T6) | |  |  |  |
|  | N | Mean | SD | p (betw een groups) | N | Mean | SD | p (betw een groups) |
| PROT- | 53 | 24.2 | 2.6 |  |  |  |  |  |
| PROT+ | 46 | 24 | 2.5 |  |  |  |  |  |
| BMI SDS | | | | | | | | |
| 11 months (T4) | |  |  | 35 months (T6) | |  |  |  |
|  | N | Mean | SD | p (betw een groups) | N | Mean | SD | p (betw een groups) |
| PROT- | 53 | 1.74 | 0.6 | 0.7 | 31 |  |  | NS |
| PROT+ | 46 | 1.72 | 0.6 |  | 36 |  |  |  |

**Saelens, Be; Sallis, Jf; Wilfley, De; Patrick, K; Cella, Ja; Buchta, R**

**Behavioral weight control for overweight adolescents initiated in primary care**

| Study  Identification |  |  |  |
| --- | --- | --- | --- |
| Sponsorship  source | This research w as supported in part by a Young Investigator’s Grant aw arded by the North American Association for the Study of Obesity to the first author | | |
| Country | USA |  |  |
| Methods | | | |
| Design | Randomized controlled trial |  |  |
| Group | Parallel group |  |  |
| IRB | Parental consentand adolescent assent w ere obtained. Study proceduresw ere approved by the San Diego State University Committeeon the Protection of  Human Subjects and the InstitutionalReview Boards of each of the clinics. | | |
| Outcomes  other than BMI | Behaviors, psychosocial |  |  |
| Population | | | |
| Inclusion  criteria | betw een 12 and 16 years old, 20% to 100% above the median (50th percentile) for body mass index (BMI) for sex and age (21), interested in w eight control,  but not currently engaged in another w eight control program, and otherw ise healthy as determined by a pediatrician. | | |
| Exclusion  criteria | No additional |  |  |
| Group  differences | Randomized |  |  |
| Special  populations | None |  |  |
|  | Healthy Habits (HH) | Typical Care (TC) | Overall |
| N | 23 | 21 | 44 |
| Sex | NR | NR | 59.1% male |
| Age | NR | NR | 14.2 |
| Race | NR | NR | 70.5% w hite, 15.9% Hispanic, 4.5% African  American, 2.3% Asian, 6.8% multi-ethnic |
| BMI | NR | NR | 30.7 |
| Interventions | |  |  |
|  | Healthy Habits (HH) | Typical Care (TC) |  |
| Intervention as described by authors | Immediat ely after baseline assessment in the clinic, HHadolescents engaged in a computer program adapted fromPACE(Patient- Centered Assessment and Counseling forExercise plus Nutrition) softw are designed for adolescents(24) and modified for  overw eight adolescents. The com-puter program assessed eating, physical activity, and sed-entary behavior and guided adolescents through individual-ized plans generated to increase physical activity ordecrease sedentary behavior and decrease dietary fat orincrease fruits/vegetables or decrease overeating/snacking. Approximately 1 w eek after the clinic visit, each HHadolescent and his/her parent met in-person w ith the firstauthor (B.E.S.) to discuss upcoming mail and phone con-  tacts and to learn food self -monitoring. Calls from a phonecounselor began 1 w eek after this meeting. elephonecounselors used detailed telephone scripts to address ado-lescents’w eight change since the last call (adolescents w ereencouraged to w eigh  once w eekly), the link betw een w eightchange and eating and | Immediat ely after baseline assessment,TC adolescents met w ith a pediatrician. Based on expertcommittee recommendations regarding pediatric obesitythat w ere given to pediatricians (28), pediatricians w ereinstructed to assess/encourage adolescent’s motivation forw eight-related behavior change, provide inf ormation aboutshort- and long-term health consequences of high w eightstatus and benefits of better w eight control, make recom- mendations for healthf ul eating consistent w ith the FoodGuide  Pyramid (29), review physical activity  recommenda-tions for adolescents (60 |  |

|  | physical activity behaviors, instruc-tion and feedback on previous self-monitoring, eating andphysical activity goals, and the use of behavioral skillsrelevant to goal achievement. | min/d of at least moderate intensityphysical activity) (27), and encourage consistency and per-sistence  w ith health behavior changes. |
| --- | --- | --- |
| Intervention  type | Lifestyle | Lifestyle |
| Intervention length | 16 w eeks | 16 w eeks |
| Intensity as described by authors | Telephonecontact w as structured to last 10 to 20 minutes and sched-uled w eekly for the first eight calls and biw eekly for the lastthree calls, thus, lasting a total of 14 to 16 w eeks | After thisnon-tailored physician- counseling session, TC adolescents w ere not contacted again until scheduling for the post-treatment  assessment4 months later |
| Assigned  intensity | 5-25 hours | <5 hours |
| Provider types | Primary care, other (phone counselors) | Primary care |
| Clinic setting | Primary care | Primary care |
| Components | Nutrition counseling, activity counseling | Nutrition counseling, activity counseling |

| Outcomes |  |  |  |  |  |  |  |  |
| --- | --- | --- | --- | --- | --- | --- | --- | --- |
| BMI SDS |  |  |  |  |  |  |  |  |
|  | 4 months |  |  |  | 7 months |  |  |  |
|  | N | Mean | SD | p (betw een groups) | N | Mean | SD | p (betw een groups) |
| Healthy Habits (HH) |  |  |  |  |  |  |  |  |
| Typical Care (TC) |  |  |  |  |  |  |  |  |
| BMI | | | | | | | | |
|  | 4 months |  |  |  | 7 months |  |  |  |
|  | N | Mean | SD | p (betw een groups) | N | Mean | SD | p (betw een groups) |
| Healthy Habits (HH) | 20 | 30.9 | 3.8 | NR | 18 | 31.1 | 4.5 | NR |
| Typical Care (TC) | 19 | 31.8 | 3.4 |  | 19 | 32.1 | 3.8 |  |

**Savoye, M; Nowicka, P; Shaw, M; Yu, S; Dziura, J; Chavent, G; O'Malley, G; Serrecchia, Jb; Tamborlane, Wv; Caprio, S Long-term results of an obesity program in an ethnically diverse pediatric population**

| Study  Identification |  |  |  |
| --- | --- | --- | --- |
| Sponsorship source | Clinical Translation Science Aw ard (UL1-RR024139) from the National Center for Research Resources; NIDDK (P30-DK-45735); NIH grants (R01-HD28016 and R01-HD40787); Yale University School of Medicine grant; an unrestricted gift from the McPheeFoundation (Bristol, CT); the Tegger Foundation; and  the Fulbright Commission | | |
| Country | USA |  |  |
| Methods | | | |
| Design | Randomized controlled trial |  |  |
| Group | Parallel group |  |  |
| IRB | The study w as approved by the Yale Human Investigation Committee, and w ritten inf ormed assent and consent w ere obtained from participants and parents. | | |
| Outcomes other  than BMI | Other obesity, blood pressure, lipids, glucose metabolism |  |  |
| Population | | | |
| Inclusion criteria | Major inclusion criteria: English-speaking, 8- to 16-year-old children w ith a BMI > or equal to the 95th percentile attending the Yale Pediatric Obesity Clinic. | | |
| Exclusion criteria | Exclusion criteria included serious medical conditions that w ould preclude participation in the program, use of medications that may cause significant w eight  gain/loss, or involvement in a coexisting w eight management program | | |
| Group differences | Randomized |  |  |
| Special  populations | None |  |  |
|  | Weight management | Control | Overall |
| N | 105 | 69 | 174 |
| Sex | 55.2% female | 58.1% female | NR |
| Age | 12 | 12.5 | NR |
| Race | 38.1% w hite, 38.1% black, 23.8% Hispanic | 34.8% w hite, 39.1% black, 26.1% Hispanic | NR |
| BMI SDS | 2.47 | 2.48 | NR |
| Interventions | |  |  |
|  | Weight management | Control |  |
| Intervention as described by authors | Bright Bodies. The program consistedof exercise tw ice (50 minutes each) and nutrition/behavior modificationonce (40 minutes each) per w eek, The nutrition education component ofthe program used a nondiet approachthat emphasized low -fat, nutrient-dense foods of moderate portions.The  exercise component of the pro-gram w as facilitated by exercise phys-iologists. | Received general nutrition and exercise counseling and brief psychosocial counseling every 6 months through the Yale  Pediatric Obesity Clinic |  |
| Intervention type | Lifestyle | Lifestyle |  |
| Intervention  length | 1 year | 1 year |  |
| Intensity as described by  authors | Lifestyle intervention sessions occurred tw ice w eekly for the first 6 months, then every other w eek for the second 6 months. The program consisted of exercise tw ice (50 minutes each) and  nutrition/behavior modification once (40 minutes each) per w eek. | Pediatric clinic every 6 months, 30 min diet counseling and psychosocial counseling. |  |
| Assigned intensity | 52+ hours | <5 hours |  |
| Provider types | Primary care, nutrition provider, exercise, psychosocial | Specialist, nutrition provider, psychosocial |  |
| Clinic setting | Multidisciplinary w eight management program | Multidisciplinary w eight management  program |  |
| Components | Nutrition counseling, activity counseling, nutrition training, activity training, CBT | Nutrition counseling, activity counseling |  |

Outcomes

| BMI SDS |  |  |  |  |  |  |  |  |  |  |
| --- | --- | --- | --- | --- | --- | --- | --- | --- | --- | --- |
|  | 12  months |  |  |  |  | 24  months |  |  |  |  |
|  | N | Mean | CI (low er  bound) | CI (upper  bound) | p (across  groups) | N | Mean | CI (low er  bound) | CI (upper  bound) | p (across  groups) |
| Weight  management | 105 | -0.21 | -0.25 | -0.17 | <0.0001 | 105 | -0.2 | -0.25 | -0.16 | <0.0001 |
| Control | 69 | 0.01 | -0.04 | 0.07 |  | 69 | -0.05 | -0.1 | 0.01 |  |
| BMI |  |  |  |  |  |  |  |  |  |  |
|  | 12  months |  |  |  |  | 24  months |  |  |  |  |
|  | N | Mean | CI (low er  bound) | CI (upper  bound) | p (across  groups) | N | Mean | CI (low er  bound) | CI (upper  bound) | p (across  groups) |
| Weight  management | 105 | -1.8 | -2.4 | -1.1 | <0.0001 | 105 | -0.9 | -1.7 | -0.1 | <0.0001 |
| Control | 69 | 1.9 | 1.1 | 2.9 |  | 69 | 1.9 | 0.9 | 2.9 |  |

**Savoye, M; Shaw, M; Dziura, J; Tamborlane, Wv; Rose, P; Guandalini, C; Goldberg-Gell, R; Burgert, Ts; Cali, Am; Weiss, R; Caprio, S**

**Effects of a weight management program on body composition and metabolic parameters in overweight children: a randomized controlled trial**

| Study  Identification |  |  |  |
| --- | --- | --- | --- |
| Sponsorship  source | NIH grants to the General Clinical Research Center (M01-RR00125) and Dr. Caprio (R01-HD28016 and R01-HD40787), Yale University School of Medicine,  and an unrestricted gift from the McPhee Foundation. | | |
| Country | USA |  |  |
| Methods | | | |
| Design | Randomized controlled trial |  |  |
| Group | Parallel group |  |  |
| IRB | The study w as approved by the Yale Human Investigation Committee and w ritten inf ormed assent and consent w ere obtained from participants and parents. | | |
| Outcomes other  than BMI | Other obesity, blood pressure, lipids, glucose metabolism |  |  |
| Population | | | |
| Inclusion criteria | BMI > 95th percentile based on the CDC grow th chart, age 8 to 16 years old, and English-speaking ability. Participants had to show an interest in the w eight  management program and have a caregiver w ho w as w illing to participate in the educational component of the program. | | |
| Exclusion criteria | Participants w ere excluded if they had diabetes, a psychiatric disorder (eg, schizophrenia, severe autism or mental retardation, or psychosis), or other serious medical condition that w ould preclude participation in the program. Participants taking medications that potentially cause significant w eight gain(eg, risperidone, olanzapine, clozopine) w ere also excluded, as w ell as participants using medications for w eight loss or involved in a co-existing w eight  management program. | | |
| Group  differences | Randomized |  |  |
| Special  populations | None |  |  |
|  | Weight management group | Control Group | Overall |
| N | 105 | 69 | 174 |
| Sex | 56.2% female | 68.1% female | NR |
| Age | 11.9 | 12.4 | NR |
| Race | 38.1% w hite, 38.1% black, 23.8% Hispanic | 34.8% w hite, 39.1% black, 26.1% Hispanic | NR |
| BMI | 35.8 | 36.2 | NR |
| Interventions | |  |  |
|  | Weight management group | Control Group |  |
| Intervention as described by authors | Intensive family-based program including exercise, nutrition, and behavior modification. | Control Group.The control groupparticipants w ere seen in the pediatric obesity clinic every 6 months and re-ceived diet and exercise counseling byregistered dietitians and physicians  alongw ith brief psychosocial counseling by asocial w orker. |  |
| Intervention type | Lifestyle | Lifestyle |  |
| Intervention  length | 12 months | 12 months |  |
| Intensity as described by authors | Participants randomized to the w eight management group attended the program tw ice a w eek for 6 months and then every other w eek for an additional 6 months. During the first 6 months, the program consisted of exercise tw ice (50 minutes each) and nutrition/behavior modification once (40 minutes each) per  w eek. | Clinic every 6 months |  |
| Assigned  intensity | 52+ hours | <5 hours |  |
| Provider types | Primary care, nutrition provider, exercise provider, social w orker | Primary care, nutrition provider, social w orker |  |
| Clinic setting | Multidisciplinary w eight management program | Multidisciplinary w eight management program |  |

| Components | Nutrition counseling, activity counseling, nutrition training, activity training,  psychosocial | Nutrition counseling, activity counseling, psychosocial |
| --- | --- | --- |

| Outcomes |  |  |  |  |  |  |  |  |  |  |
| --- | --- | --- | --- | --- | --- | --- | --- | --- | --- | --- |
| BMI |  |  |  |  |  |  |  |  |  |  |
|  | 6  months |  |  |  |  | 12  months |  |  |  |  |
|  | N | Mean | CI (low er  bound) | CI (upper  bound) | p (across  groups) | N | Mean | CI (low er  bound) | CI (upper  bound) | p (across  groups) |
| Weight management group | 105 | -2.1 | -2.6 | -1.5 | <0.001 | 105 | -1.7 | -2.3 | -1.1 | <0.001 |
| Control Group | 69 | 1.1 | 0.4 | 1.8 |  | 69 | 1.6 | 0.8 | 2.3 |  |

**Serra-Paya, N; Ensenyat, A; Castro-Vinuales, I; Real, J; Sinfreu-Bergues, X; Zapata, A; Mur, Jm; Galindo-Ortego, G; Sole-Mir, E; Teixido, C Effectiveness of a multi-component intervention for overweight and obese children (nereu program): a randomized controlled trial**

| Study  Identification |  |  |  |
| --- | --- | --- | --- |
| Sponsorship  source | This research is partially funded by theInstituto de Salud Carlos III in Spain, from the Ministryof Economy and Competitiveness (Grant PI12/02220)cof unded  by FEDER and the Institute of PhysicalEducation of Catalonia (INEFC), University of Lleida,Spain | | |
| Country | Spain |  |  |
| Methods | | | |
| Design | Randomized controlled trial |  |  |
| Group | Parallel group |  |  |
| IRB | All children and their parents or guardians gave w ritten inf ormed consent. The studyprotocol w as approved by the Clinical Research Ethics Committee  (CEIC) of the Primary CareResearch Institute IDIAP-Jordi Gol (Registration number: P12/040) and w as carried outaccording to the principles of the Declaration of Helsinki and subsequent revisions | |  |
| Outcomes other  than BMI | Other obesity, behaviors |  |  |
| Population | | | |
| Inclusion criteria | children from Lleida aged 6 to 12 years w ho w ere overw eight or obeseaccording to the International Obesity Task Force (IOTF) criteria [17], engaged in low  levels of activity (less than 2 hours per w eek of outside of school hours), and for w hom complete dataw ere available. | | |
| Exclusion criteria | All children w ere free of medical comorbidi-ties, not using any medications that might affect w eight loss or physiological responses to exer-tion, and had not  been enrolled in any other obesity treatment interventions in the previous 6months. | | |
| Group differences | Randomized |  |  |
| Special  populations | None |  |  |
|  | Nereu Program | Counseling | Overall |
| N | 54 | 59 | 113 |
| Sex | 50% male | 56% male | NR |
| Age | 10.1 | 9.7 | NR |
| Race | NR | NR | NR |
| BMI SDS | 2.47 | 2.42 | NR |
| Interventions | |  |  |
|  | Nereu Program | Counseling |  |
| Intervention as described by authors | The NP is an intensive, 8-month, family-based multi-component, behavioural intervention inprimary care settings, consisting of 4 components: (a) Supervised physical activity sessions forchildren, (b) Family theoretical and practical sessions for parents, (c) Behaviour  strategy ses-sions for both children and parents, and (d) Weekend activities. | Eight monthly, 10-minute, structured, family meetings w ere scheduled w ith the child’s paediat- rics unit. The content of these family sessions w as  the same as the Nereu Program intervention. |  |
| Intervention type | Lifestyle | Lifestyle |  |
| Intervention  length | 8 months | 8 months |  |
| Intensity as described by authors | Supervised physical activity sessions for children. The program offered 90 one-hour sessions(3 per w eek).The 21 theoretical and practical group counselling sessions took place just once a w eek (60 minutes each) at the same time as the children’s sessions three behaviour strategy sessions Extra family activities (e.g. a ski or w ater-park party) w ere  organized on3 w eekends, | Eight monthly, 10-minute, structured, family meetings |  |
| Assigned intensity | 52+ hours | <5 hours |  |
| Provider types | Mental health, Exercise, nutrition provider | Primary care |  |
| Clinic setting | Primary care | Primary care |  |
| Components | Nutrition counseling, activity counseling, activity training | Nutrition counseling, activity counseling |  |

| Outcomes |  |  |  |  |
| --- | --- | --- | --- | --- |
| BMI SDS |  |  |  |  |
|  | 8 months |  |  |  |
|  | N | Mean | SD | p (betw een groups) |
| Nereu Program | 54 | -0.12 | 0.22 | 0.415 |
| Counseling | 59 | -0.09 | 0.23 |  |

**Shelton, D; Gros, K; Norton, L; Stanton-Cook, S; Morgan, J; Masterman, P**

**Randomised controlled trial: a parent-based group education programme for overweight children**

| Study Identification |  |  |  |
| --- | --- | --- | --- |
| Sponsorship source | Golden Casket’s Working Wonders Grant. |  |  |
| Country | Australia |  |  |
| Methods |  |  |  |
| Design | Randomized controlled trial |  |  |
| Group | Parallel group |  |  |
| IRB | Inf ormed consent to participate in this study w as obtained fromparents or care givers in accordance w ith approval from theHuman Research Ethics  Committee of The Gold Coast DistrictHealth Service | |  |
| Outcomes other  than BMI | Behaviors, other (parenting) |  |  |
| Population |  |  |  |
| Inclusion criteria | Families w ere included inthe study if the child w as 3–10 years old and had a BMI ≥ 85thpercentile after adjusting for age and gender (i.e. National Healthand Medical Research Council definition of overw eight). Oneparent or primary care giver w as required to attend all assess-ment and treatment sessions. Parents or care givers w ererequired to read a treatment manual and complete child foodintake, physical activity and sedentary electronic media  moni-toring inventories. | | |
| Exclusion criteria | Exclusion criteria included the presence of amedical diagnosis for the child’s w eight, or if either parent orchild had a disability causing dietary or exercise  restrictions. | | |
| Group differences | Randomized |  |  |
| Special populations | None |  |  |
|  | Treatment | Control | Overall |
| N | 28 | 15 | 43 |
| Sex | 50% male | 40% male | NR |
| Age | 7.89 | 7.33 | NR |
| Race | NR | NR | NR |
| BMI | 26.37 | 26.91 | NR |
| Interventions | |  |  |
|  | Treatment | Control |  |
| Intervention as described by authors | Each family received a comprehensive parent treatment manualdeveloped by the project team. All treatment sessions  w ereintegrated w ith the parent manual and a slide presentation. Allparticipants then attended a follow -up session w here post- treatment measures w ere taken. Content of manual included know ledge tools, nutritional tools, activity tools, and motivation tools. | Usual care (not w ell described) |  |
| Intervention type | Lifestyle | Usual care |  |
| Intervention length | 3 months | 3 months |  |
| Intensity as  described by authors | Components included an initial assessment session attended bythe parent and child, follow ed by four group sessions at w eeklyintervals of 2-hour duration each attended by the parent only | Not described |  |
| Assigned intensity | 5-25 hours | <5 hours |  |
| Provider types | Primary care, nutrition provider, exercise provider, mental health | Primary care |  |
| Clinic setting | Primary care, research | Primary care |  |
| Components | Nutrition counseling, activity counseling, motivational interview ing | Usual care |  |

Outcomes

BMI

3 months (Time 2)

|  | N | Mean | SD | p (betw een groups) |
| --- | --- | --- | --- | --- |
| Treatment | 28 | 24.8 | 3.2 | <0.05 |
| Control | 15 | 26.5 | 4 |  |

**Sherwood, Ne; JaKa, Mm; Crain, Al; Martinson, Bc; Hayes, Mg; Anderson, Jd**

**Pediatric Primary Care-Based Obesity Prevention for Parents of Preschool Children: a Pilot Study**

| Study  Identification |  |  |  |
| --- | --- | --- | --- |
| Sponsorship  source | The project described w as supported by grant numbersA1R21DK078239 (principal investigator [PI]: Sherw ood),P30DK050456 (PI: Levine), and  P30DK092924 (PI:Schmittdiel) from the National Institute of Diabetes andDigestive and Kidney Diseases (NIDDK). | |  |
| Country | USA |  |  |
| Methods | | | |
| Design | Randomized controlled trial |  |  |
| Group | Parallel group |  |  |
| IRB | Consent forms w ere review ed w ith and signed by theparent. This study w as approved by the HealthPartners Institutional Review Board | |  |
| Outcomes other  than BMI | Behaviors |  |  |
| Population | | | |
| Inclusion criteria | Eligibility criteria included: (1) child at risk for obesity (BMI percentile betw een 50th and 85th w ith one overw eight parent) or overw eight (85th percentile £ BMI <  95th percentile); (2) English-speaking parent; and (3) child not using a steroid medication for more than 1 month. | | |
| Exclusion  criteria | No additional |  |  |
| Group  differences | Randomized |  |  |
| Special populations | Preschoolers |  |  |
|  | Busy Bodies/Better Bites | Healthy Tots/Safe Spots | Overall |
| N | 30 | 30 | 60 |
| Sex | 50% female | 40% female | 45%  female |
| Age | 2.6 | 2.9 | NR |
| Race | 77% w hite, 7% Hispanic | 83% w hite, 7% Hispanic | NR |
| BMI SDS | 1.01 | 0.86 | NR |
| Interventions | |  |  |
|  | Busy Bodies/Better Bites | Healthy Tots/Safe Spots |  |
| Intervention as described by authors | The pilot intervention programs included a brief pedi- atric primary care component and eight phone coaching sessions. Participants received pediatric PCP counseling during their w ell-child visit to raise parental aw areness of their child’s obesity risk and provide messaging regarding obesity and injury prevention behaviors. The eight-session phone coaching program focused on healthy eating and PA. | The pilot intervention programs included a brief pedi-atric primary care component and eight phone coachingsessions. Participants received pediatric PCP counselingduring their w ell-child visit to raise parental aw areness oftheir child’s obesity risk and provide messaging regardingobesity and injury prevention behaviors. Healthy Tots/Safe Spots goals included:(1) distracted driving reduction; (2) fall prevention;  (3) firesaf ety; (4) poison control; and (5) sun protection. |  |
| Intervention  type | Lifestyle | Lifestyle |  |
| Intervention  length | 4 months (8 phone sessions held bi-w eekly) | 4 months (8 phone sessions held bi-w eekly) |  |
| Intensity as  described by authors | The first phone coaching session w as scheduled and 15- to 30-minute  calls inf ormed by social ecological models, 30 social cognitive theory, 31 and motivational interview ing 32 w ere held biw eekly. | The first phone coaching session w as scheduled and 15- to 30-minute  calls inf ormed by social ecological models, 30 social cognitive theory, 31 and motivational interview ing 32 w ere held biw eekly. |  |
| Assigned  intensity | <5 hours | <5 hours |  |
| Provider types | Primary care, nutrition provider, other ("experienced interventionists") | Primary care, other ("experienced interventionists") |  |
| Clinic setting | Primary care | Primary care |  |

| Components | Nutrition counseling, activity counseling, motivational interview ing | Injury prevention |
| --- | --- | --- |

| Outcomes |  |  |  |  |
| --- | --- | --- | --- | --- |
| BMI SDS |  |  |  |  |
|  | 6 months |  |  |  |
|  | N | Mean | SD | p (betw een groups) |
| Busy Bodies/Better Bites | 26 | 0.99 | 0.37 | 0.89 |
| Healthy Tots/Safe Spots | 29 | 0.85 | 0.61 |  |

**Small, L; Bonds-McClain, D; Melnyk, B; Vaughan, L; Gannon, Am**

**The preliminary effects of a primary care-based randomized treatment trial with overweight and obese young children and their parents**

| Study  Identification |  |  |  |
| --- | --- | --- | --- |
| Sponsorship  source | Funding w as provided by the National Institute of Diabetes,Digestive, and Kidney Diseases and the Aetna Foundation forHealthy Communities | |  |
| Country | USA |  |  |
| Methods | | | |
| Design | Randomized controlled trial |  |  |
| Group | Parallel group |  |  |
| IRB | "After obtaining IRB approval" |  |  |
| Outcomes other  than BMI | Other obesity |  |  |
| Population | | | |
| Inclusion criteria | 4-8 year olds w ith overw eight |  |  |
| Exclusion  criteria | uncontrolled medical problems (e.g., asthma)that might preclude them from fully participating in theintervention. | |  |
| Group  differences | Randomized |  |  |
| Special  populations | None |  |  |
|  | Treatment Group | Control Group | Overall |
| N | 33 | 27 | 60 |
| Sex | 48.5% male | 29.6% male | 40%  male |
| Age | 5.73 | 5.41 | 5.58 |
| Race | 63% w hite, 9% black, 24% other, 0% other | 66% w hite, 0% black, 25% Hispanic, 7% other | NR  (typos) |
| BMI Percentile | 96.7 | 95.4 | 96.1 |
| Interventions | |  |  |
|  | Treatment Group | Control Group |  |
| Intervention as described by authors | In both condi-tions, parents w ere asked to attend a total of foursessions at their child’s primary care office. ar-ents in the treatment group (n= 34) w ere  offerededucational inf ormation about the establishment of healthy habits in young children, nutritional inf orma-tion, inf ormation regarding increasing physical activityand decreasing sedentary time, and age-specific inf or-mation  regarding the child’s behavior in responseto change | In both condi-tions, parents w ere asked to attend a total of  foursessions at their child’s primary care office. parents assigned to the controlcondition (n= 33) w ere provided w ith educationalage- appropriate, evidence-based health and saf ety in-formation (e.g., care for thermal injuries, first-aid care,andcaref or insect bites andstings) |  |
| Intervention type | Lifestyle | Control |  |
| Intervention  length | 16 w eeks | 16 w eeks |  |
| Intensity as  described by authors | 4 visits of 30 to 60 minutes | 4 visits of 30 to 60 minutes |  |
| Assigned intensity | <5 hours | <5 hours |  |
| Provider types | Primary care, other (researcher) | Primary care, other (researcher) |  |
| Clinic setting | Primary care | Primary care |  |
| Components | Nutrition counseling, activity counseling, motivational interview ing | Control |  |

| Outcomes |  |  |  |  |  |  |  |  |
| --- | --- | --- | --- | --- | --- | --- | --- | --- |
| BMI Percentile |  |  |  |  |  |  |  |  |
| 3 months (Time 3) | |  |  | 6 months (Time 4) | |  |  |  |
|  | N | Mean | SD | p (betw een groups) | N | Mean | SD | p (betw een groups) |
| Treatment Group | 33 | 92.42 | 6.81 | NS | 33 | 95.13 | 4.91 | NS |
| Control Group | 27 | 90.19 | 11.9 | - | 27 | 94.74 | 5.98 | - |

**Stark, Lj; Clifford, Lm; Towner, Ek; Filigno, Ss; Zion, C; Bolling, C; Rausch, J**

**A pilot randomized controlled trial of a behavioral family-based intervention with and without home visits to decrease obesity in preschoolers**

| Study  Identification |  |  |  |  |
| --- | --- | --- | --- | --- |
| Sponsorship source | The project described w as supported by the NationalInstitutes of Digestive Diseases and Kidney through grantD24 DK 059492 (L.J.S.) and National Center for ResearchResources and the National Center for AdvancingTranslational Sciences through Grant 8 UL1 TR000077-04, National Institutes of  Health. | | | |
| Country | USA |  |  |  |
| Methods | | | | |
| Design | Randomized controlled trial |  |  |  |
| Group | Parallel group |  |  |  |
| IRB | The protocol w as ap-proved by the institutional review board, and parents pro-vided inf ormed consent for participation bef ore datacollection. | | |  |
| Outcomes  other than BMI | Behavior, other (parenting, parent w eight) |  |  |  |
| Population | | | | |
| Inclusion  criteria | Inclusion criteria w ere (1) child age of 2–5 years; (2) child 95th percentile BMI (Kuczmarski et al., 2000), but <100% above the mean BMI; (3) one  parent w ith a BMI 25; and (4) medical clearance from the child’s pediatrician. | | | |
| Exclusion  criteria | (1) non-Englishspeaking; (2) living50 miles from the medical center; (3)disability or illness that w ould interfere w ith moderatephysical activity; (4) medical  condition/medication associ-ated w ith w eight gain; or (5) enrolled in a w eight controlprogram | | | |
| Group  differences | Randomized |  |  |  |
| Special  populations | Children 2-5 |  |  |  |
|  | Pediatrician Counseling (PC) | LAUNCH-HV (Clinic & Home) | LAUNCH-Clin ic | Overall |
| N | 12 | 10 | 11 | 33 |
| Sex | 67% female | 80% female | 64% female | NR |
| Age | 4.8 | 4.7 | 4.2 | NR |
| Race | 75% w hite | 90% w hite | 91% w hite | NR |
| BMI SDS | 2.4 | 2.1 | 2.5 | NR |
| Interventions | |  |  |  |
|  | Pediatrician Counseling (PC) | LAUNCH-HV (Clinic & Home) | LAUNCH-Clin ic |  |
| Intervention as described by authors | A board-certified pediatrician meteach family individually for one 45 min visit to explainBMI, BMI percentiles and to review the child’s grow thchart. Modeled on the Stage 1 Intervention ‘‘PreventionPlus’’ (Barlow , 2007),  the pediatrician recommended(1) screen time2 h daily; (2) active play60 min daily;(3) eliminating soda and4 ounces daily; (4) fruits andvegetables5 servings daily; (5) limiting  eating out; and(6) appropriate portion sizes for  preschoolers. Each familyw as given a one-page healthy food and activity brochure | LAUNCH-HV w as an 18-session manualized interventiondesigned to produce small decreases or stabilize the rate ofchild w eight gain, consistent w ith current recommenda-tions for treatment of preschool obesity. The parent-group clinicsessions (90 min each) w ere conducted by a licensed clin-ical psychologist or second-year psychology postdoctoralfellow and included education on diet (Weeks 2–7), phys-ical activity (Weeks 8–12), and parenting skills (all sessionsto f acilitate diet and activity goals). A ‘‘home clean-out’’ w as  conductedf ollow ing each clinic session on diet. | LAUNCH-clinic intervention content w as identical toLAUNCH- HV  clinic sessions. n lieu of home visits,parents w ere provided a ‘‘home clean-out’’ box to use ontheir ow n to eliminate high-calorie low -nutrient  foods fromthe home. |  |
| Intervention type | Lifestyle | Lifestyle | Lifestyle |  |
| Intervention  length | 6 months | 6 months | 6 months |  |

| Intensity as described by authors | A board-certif ied pediatrician met each family individually for one 45 min visit to explain BMI,  BMI percentiles and to review the child’s grow th chart. | haseI (Intensive Intervention), 12 w eekly sessions, alternatingbetw een group-based clinic sessions (parent and child con-current groups), and individual home visits and Phase II(Maintenance), 12 w eeks of every-other-w eek sessions, al-ternating betw een  group clinic, and individual homesessions. | LAUNCH-clinic sessions w ere conductedevery other w eek during Months 1–3 and monthlyduring Months 4–6 of the intervention, for 10  treatmentsessions |
| --- | --- | --- | --- |
| Assigned intensity | <5 hours | 5-25 hours | 5-25 hours |
| Provider types | Primary care | Primary care, other (psychology fellow ) | Primary care, other (psychology  fellow ) |
| Clinic setting | Primary care | Primary care | Primary care |
| Components | Nutrition counseling, activity counseling | Nutrition counseling, activity counseling, nutrition training, motivational interview ing, other (parenting skills) | Nutrition counseling, activity counseling, nutrition training, motivational interview ing, other  (parenting skills) |

| Outcomes |  |  |  |  |  |  |  |  |  |  |
| --- | --- | --- | --- | --- | --- | --- | --- | --- | --- | --- |
| BMI SDS |  |  |  |  |  |  |  |  |  |  |
|  | 6  months |  |  |  |  | 12  months |  |  |  |  |
|  | N | Mean | SD | p (PC vs LAUNCH-  HV) | p (PC vs LAUNCH-  clinic) | N | Mean | SD | p (PC vs LAUNCH-  HV) | p (PC vs LAUNCH-  clinic) |
| Pediatrician Counseling  (PC) | 12 | -0.07 | 0.18 | 0.007 | 0.08 | 12 | -0.03 | -  0.36 | 0.0003 | 0.04 |
| LAUNCH-HV (Clinic &  Home) | 10 | -0.37 | 0.42 |  |  | 10 | -0.5 | 0.43 |  |  |
| LAUNCH-Clin ic | 11 | -0.25 | 0.25 |  |  | 11 | -0.59 | 0.75 |  |  |

**Stark, Lj; Spear, Filigno S; Bolling, C; Ratcliff, Mb; Kichler, Jc; Robson, Sm; Simon, Sl; McCullough, Mb; Clifford, Lm; Odar, Stough C; Zion, C; Ittenbach, Rf Clinic and Home-Based Behavioral Intervention for Obesity in Preschoolers: a Randomized Trial**

| Study  Identification |  |  |  |  |
| --- | --- | --- | --- | --- |
| Sponsorship  source | National Institute of Diabetes and Digestive and Kidney Diseases (NIDDK) (R01DK091251), the National Center for Advancing Translational Sciences of the  National Institutes of Health (NIH) (UL1 TR001425), and the NIH (T32 DK063929). | | | |
| Country | USA |  |  |  |
| Methods | | | | |
| Design | Randomized controlled trial |  |  |  |
| Group | Parallel group |  |  |  |
| IRB | The study w as approved by the institutional review board at the primary medical center w here the study w as conducted, and w ritten inf ormed consent w as  obtained from caregivers. | | | |
| Outcomes  other than BMI | None |  |  |  |
| Population | | | | |
| Inclusion  criteria | Inclusion criteria w ere (1) ages 2-5 years; (2) BMI percentile for age and sex ≥95th17 but no more than 100% above the median BMI; (3) medical clearance  from their pediatrician; (4) active patient w ith anthropometric measurements w ithin the previous year; and (5) living w ithin 50 miles from the medical center | | | |
| Exclusion criteria | Exclusion criteria included (1) developmental disability or medical conditions know n to promote obesity (eg, Prader-Willi syndrome); (2) child enrolled in another  w eight control program; (3) taking w eight-affecting medications (eg, steroids); (4) condition that w ould preclude full participation in the program; and (5) non- English-speaking. | | | |
| Group  differences | Randomized |  |  |  |
| Special populations | Preschoolers |  |  |  |
|  | LAUNCH | Motivational Interview ing | Standard Care | Overall |
| N | 47 | 50 | 54 | 151 |
| Sex | 53.2% female | 58.0% female | 59.3% female | 57.0%  female |
| Age | 4.6 | 4.6 | 4.6 | 4.6 |
| Race | 6.4% black, 78.2% w hite, 14.9% other; 2.1% Hispanic | 12% black, 76% w hite, 12% other; 6% Hispanic | 9.3% black, 74.1% w hite,  16.7% other, 9.3% Hispanic | 9.3% black,  76.2%  w hite, 14.6% other,  6% Hispanic |
| BMI SDS | 2.41 | 2.41 | 2.48 | 2.44 |
| Interventions | |  |  |  |
|  | LAUNCH | Motivational Interview ing | Standard Care |  |
| Intervention as described by authors | Parent clinic-based group sessions w ere 90 minutes each andled by a licensed clinical psychologist.  Sessions consisted of edu-cation and problem-solving around parent and child diet,dietary and physical activity changes, and child behavior man-agement strategies such as differential attention (eg, ignoringcomplaints about food, praising trying vegetables), contin-gency management (eg, rew arding  healthy behaviors), limitsetting, effective use of time- out to manage tantrums, shaping(eg, gradually | Motivational interview ing w as a parent only intervention consisting of 18 sessions over 6months, delivered w eekly during the initial 3 months and every other w eek months  4-6. At the initial 60-minute session parents met w ith a pediatrician trained in motivational interview ing during w hich they completed questionnaires to assess their  values and motivation for change, w ere given inf ormation about their child’s w eight and BMI percentile, and a  packet of publicly available materials/brochures from the “Let’s Go 5-2-1-0” program. Subsequent motivational | Standard care inf ormed caregivers of their child’s w eightstatus during the recruitment process, but neither the chil-dren nor caregivers received any treatment. |  |

|  | introducing change), and exposure to intro-duce new  foods, and implementing stimulus control mea-sures to improve food choices and physical activity. | interview ing intervention sessions w ere delivered by a licensed clinical psychologist trained in motivational interview ing in either the families’ home (sessions 2,12,16) or over the telephone (14 sessions). The median phone session length w as 15 minutes w ith 22% (135 of 625 of phone sessions) being ≤10 minutes. All home  visits w ere scheduled for 60 minutes. |  |
| --- | --- | --- | --- |
| Intervention  type | Lifestyle | Lifestyle | Usual care |
| Intervention  length | 6 months | 6 months | 6 months |
| Intensity as described by authors | LAUNCH is an 18-session clinic and home family- based be-havioral w eight management intervention, consisting of a3-month intensive treatment phase  (w eekly sessions) fol-low ed by a 3-month maintenance phase (every other w eek ses-sions). Intervention sessions alternated betw een clinic (10sessions) and  home (8 sessions) visits. | Motivational interview ing w as a parent only interventionconsisting of 18 sessions over 6 months, delivered w eekly duringthe initial 3 months and every other w eek months 4-6. | Recruitment appointment only |
| Assigned  intensity | 5-25 hours | 5-25 hours | <5 hours |
| Provider types | Primary care, nutrition provider, mental health | Primary care, nutrition provider, mental health | Primary care |
| Clinic setting | Primary care | Primary care | Primary care |
| Components | Nutrition counseling, activity counseling, nutrition training, other (parenting) | Nutrition counseling, activity counseling, motivational interview ing | Usual care |

| Outcomes |  |  |  |  |  |
| --- | --- | --- | --- | --- | --- |
| BMI SDS |  |  |  |  |  |
|  | 6 months |  |  |  |  |
|  | N | Mean | SD | p (LAUNCH vs MI) | p (LAUNCH vs Standard) |
| LAUNCH | 47 | -0.32 | 0.33 | <0.001 | 0.004 |
| Motivational Interview ing | 50 | -0.05 | 0.27 |  |  |
| Standard Care | 54 | -0.13 | 0.31 |  |  |

**Stark, Lj; Spear, S; Boles, R; Kuhl, E; Ratcliff, M; Scharf, C; Bolling, C; Rausch, J**

**A pilot randomized controlled trial of a clinic and home-based behavioral intervention to decrease obesity in preschoolers**

| Study  Identification |  |  |  |
| --- | --- | --- | --- |
| Sponsorship  source | This study w as supported by grant D24 DK 059492 from the National Institutes of Health (L.j.S.) and USPHS grant UL1RR026314 from the  National Center for Research Resources of the NIH | | |
| Country | USA |  |  |
| Methods | | | |
| Design | Randomized controlled trial |  |  |
| Group | Parallel group |  |  |
| IRB | The protocol w as approved by the institutional review board and parents provided inf ormed consent for participation. | |  |
| Outcomes other  than BMI | Behaviors |  |  |
| Population | | | |
| Inclusion  criteria | Inclusion criteria w ere (i) child age betw een 2 and 5 years; (ii) child ≥95th percentile BMI (12), but not more than 100% above the mean BMI; (iii) at  least one parent w ith a BMI ≥25; and (iv) medical clearance from the child’s pediatrician. | | |
| Exclusion  criteria | Exclusion criteria w ere (i) non-English speaking; (ii) living >50 miles from the medical center; (iii) a disability or illness that w ould interfere w ith at least  moderate physical activity; (iv) medical condition/medication associated w ith w eight gain; or (v)currently enrolled in another w eight-control program. | | |
| Group  differences | Randomized |  |  |
| Special populations | Preschoolers |  |  |
|  | LAUNCH | Pediatrician Counseling (PC) | Overall |
| N | 8 | 10 | 18 |
| Sex | 25% female | 40% female | female 6  (33.3%) |
| Age | 4.4 | 3.9 | NR |
| Race | 75% w hite, 25% Hispanic | 90% w hite, 10% Hispanic | 15 ( 83%)  White, 3  (17%)  Hispanic |
| BMI Percentil | 99 | 97.7 | NR |
| Interventions | |  |  |
|  | LAUNCH | Pediatrician Counseling (PC) |  |
| Intervention as described by authors | Parent-group clinic sessions (90min each) addressed three compo- nents: dietary education, physical activity and parenting skills.  Throughout treatment, parents w ere taught to use child behavior management skills (16) to implement dietary and activity changes including: (i) praise and attention to increase healthy eating and physical activity; (ii) ignoring and time-out to manage tantrums; (iii) contingency management; and (iv) modeling. Children w ere seen concurrently in a group format. They received nutrition education through games and art activities, tried new foods during a structured meal, and completed 15min of moderate to vigorous activity. In- home sessions (60–90min each) w ere designed to support gener-  alization of the clinic-taught skills to the home environment and w ere conducted by psychology postdoctoral fellow s. | Pediatricial Counseling. PC w as designed to deliver dietary and physical activity recommendations outlined by the American Academy of Pediatrics (13). Follow ing a scripted manual a board-certified pediatrician met each family individually for one 45-min visit to review the child’s grow th chart and to explain BMI, BMI per-centiles, and the child’s current BMI percentile. The follow ing recom-mendations w ere made in accordance w ith the Stage 1 Intervention: “Prevention Plus” for obese preschool children (14); (i) ≤2h/day of screen time;  (ii) 60min/day of active play; (iii) eliminating soda and limiting juice to 4oz./day); (iv)providing ≥5servings/day of fruits and vegetables; (v) limiting eating out; and (vi) appropriate portion sizes for preschoolers. |  |
| Intervention  type | Lifestyle | Lifestyle |  |

| Intervention  length | 6 months | 6 months |
| --- | --- | --- |
| Intensity as described by authors | The 6-month intervention consisted of tw o phases. Phase 1 (Intensive Intervention) w as 12 w eekly sessions that alternated betw een group-based clinic sessions (parent and child concurrent groups) and individual home visits. Phase 2  (Maintenance) w as 12 w eeks of every other w eek sessions, alternating betw een group sessions in clinic and home sessions. | One 45 minute visit |
| Assigned  intensity | 26-51 hours | <5 hours |
| Provider types | Psychologist, psychology fellow s nutritionist | Primary care |
| Clinic setting | Primary care | Primary care |
| Components | Nutrition counseling, activity counseling, nutrition training, activity  training, other (parenting) | Nutrition counseling, activity counseling |

| Outcomes |  |  |  |  |  |  |  |  |
| --- | --- | --- | --- | --- | --- | --- | --- | --- |
| BMI SDS |  |  |  |  |  |  |  |  |
|  | 6 months |  |  | 12 months | |  |  |  |
|  | N | Mean | SD | p (betw een groups) | N | Mean | SD | p (betw een groups) |
| LAUNCH | 7 | -0.49 | 0.36 | 0.003 | 7 | -0.37 | 0.41 | 0.005 |
| Pediatrician Counseling (PC) | 10 | 0.1 | 0.32 |  | 9 | 0.4 | 0.49 |  |

**Stettler, N.; Wrotniak, B. H.; Hill, D. L.; Kumanyika, S. K.; Xanthopoulos, M. S.; Nihtianova, S.; Shults, J.; Leff, S. S.; Pinto, A.; Berkowitz, R. I.; Faith, M. S.**

**Prevention of excess weight gain in paediatric primary care: beverages only or multiple lifestyle factors. The Smart Step Study, a cluster-randomized clinical trial**

| Study  Identification |  |  |  |  |
| --- | --- | --- | --- | --- |
| Sponsorship  source | The study w as funded by a National Institutes of Health(NIH) grant, 5R01HL084056. | |  |  |
| Country | USA |  |  |  |
| Methods | | | | |
| Design | Cluster randomized controlled trial |  |  |  |
| Group | Parallel group |  |  |  |
| IRB | The study w as approved by the InstitutionalReview Boards of CHOP and the other institutions involvedw ith subjects | | |  |
| Outcomes other than  BMI | Other obesity |  |  |  |
| Population | | | | |
| Inclusion criteria | subjects w ere selected w ith a BMI betw een the 75th and the 95th percentile based on the last clinic visit w hen their w eight and height w ere measured (18). At the baseline visit, some subjects w ere measured to be outside of this range, but w ere included, as they w ere still considered at risk for excess w eight gain, based on their BMI at the previous clinic visit. Other inclusion criteria w ere: age 8.0–12.9 years, consulting at the selected practice in the past 3 years and  consuming an average of at least 4 oz of sugar-sw eetened beverages (see definition in Table S1) per day, to insure relevance of the beverage-only intervention. | | | |
| Exclusion criteria | Exclusion criteria w ere serious physical or psychiatric conditions or medications potentially interfering w ith nutrition or physical activity, as determined by the primary care paediatrician. Home-schooled patients w ere excluded, so that the control intervention (bullying prevention) w ould be relevant to those randomized  to it. | | | |
| Group  differences | Cluster randomized, but some large differences in race and baseline BMIz | |  |  |
| Special  populations | None |  |  |  |
|  | Control | Beverage-only | Multiple Behaviors | Overall |
| N | 33 | 76 | 63 | 172 |
| Sex | 45% female | 51% female | 57% female | F 75  (54%) |
| Age | 10.8 | 10.8 | 10.7 | 10.7 |
| Race | 70% w hite, 24% black, 6% other; 9% Hispanic | 63% w hite, 33% black, 4% other; 4% Hispanic | 32% w hite, 63% black, 5% other; 8% Hispanic | w hite 68  (49%);  black 65  (47%) |
| BMI SDS | 1.34 | 1.21 | 1.22 | 1.17 |
| Interventions | |  |  |  |
|  | Control | Beverage-only | Multiple Behaviors |  |
| Intervention as described by authors | The theory-based (behavioural economics),  family-based, culturally and developmentally appropriateintervention consisted of tw elve 15– 25 min clinician, childand at least one parent or guardian encounters over 12months. Children earned points, based on session attend-ance and goal achievements, w hich they could exchangef or small prizes selected from a study catalogue. Control w as bullying prevention. | The theory-based (behavioural economics),  family-based, culturally and developmentally appropriateintervention consisted of tw elve 15– 25 min clinician, childand at least one parent or guardian encounters over 12months. Children earned points, based on session attend-ance and goal achievements, w hich they could exchangef or small prizes selected from a study catalogue. Addressed only beverage  consumption. | The theory-based (behavioural economics),  family-based, culturally and developmentally appropriateintervention consisted of tw elve 15– 25 min clinician, childand at least one parent or guardian encounters over 12months. Children earned points, based on session attend-ance and goal achievements, w hich they could exchangef or small prizes selected from a study catalogue. Addressed multiple behaviors |  |

| Intervention  type | Control | Lifestyle | Lifestyle |
| --- | --- | --- | --- |
| Intervention  length | 12 months | 12 months | 12 months |
| Intensity as  described by authors | 12 15-25 mi sessions | 12 15-25 mi sessions | 12 15-25 mi sessions |
| Assigned  intensity | 5-25 hours | 5-25 hours | 5-25 hours |
| Provider types | Primary care | Primary care | Primary care |
| Clinic setting | Primary care | Primary care | Primary care |
| Components | Control | Nutrition counseling | Nutrition counseling, activity counseling |

| Outcomes |  |  |  |  |
| --- | --- | --- | --- | --- |
| BMI SDS |  |  |  |  |
| 12 months | | | | |
|  | N | Mean | SD | p (vs control) |
| Control | 24 | 1.44 | 0.44 |  |
| Beverage-only | 51 | 1.18 | 0.62 | 0.03 |
| Multiple Behaviors | 46 | 1.16 | 0.53 | 0.03 |

**Stovitz, Sd; Berge, Jm; Wetzsteon, Rj; Sherwood, Ne; Hannan, Pj; Himes, Jh**

**Stage 1 treatment of pediatric overweight and obesity: a pilot and feasibility randomized controlled trial**

| Study  Identification |  |  |  |
| --- | --- | --- | --- |
| Sponsorship  source | This research w assupported by a pilot grant offered by the University of Minnesota Obesity Prevention Center and Grant NumberP30 DK050456 from  the National Institute of Diabetes andDigestive and Kidney Diseases. | | |
| Country | USA |  |  |
| Methods | | | |
| Design | Randomized controlled trial |  |  |
| Group | Parallel group |  |  |
| IRB | This study w as approved by the University of Minne-sota’s Institutional Review Board ( Minneapolis, MN) | |  |
| Outcomes other  than BMI | Behaviors |  |  |
| Population | | | |
| Inclusion criteria | Patients 4.0 to<9.0 years of age w ith a BMI‡85th percentile w ere eligible. |  |  |
| Exclusion criteria | Patients w ere excluded if they had any chronic or current health condition that might affect w eight stability ( e . g ., autism, acute gastrointestinal illness, and w eight-altering medications). In addition, the parent needed to be conversationally fluent in English to participate in follow -up phone calls w ithout the use of  an interpreter | | |
| Group  differences | Randomized |  |  |
| Special Populations | None |  |  |
|  | Intervention | Control | Overall |
| N | 35 | 36 | 71 |
| Sex | 54% female | 47% female | 51% female |
| Age | 6.23 | 5.7 | 5.96 |
| Race | 49% w hite, 29% black, 11% Hispanic, 9% Asian, 3% other | 42% w hite, 25% black, 11%  Hispanic, 17% Asian, 6% other | 45% w hite, 27%  black, 11%  Hispanic, 13%  Asian, 4% other |
| BMI SDS | 1.9 | 1.89 | 1.9 |
| Interventions | |  |  |
|  | Intervention | Control |  |
| Intervention as described by authors | The intervention group received management patterned after the ‘‘Prevention plus, Stage 1’’ treatment recommended by the expert panel and approved by the committee. 16,17 Given the age of the children, the counseling w as primarily directed tow ard the parents. 21–23 On the day of enrollment, after randomization, the RA review ed the BMI 2 survey 20 and discussed evidence-based recommendations for childhood obesity treatment w ith the parent. For this study, monthly follow -up w as chosen, allow ing the parent to choose the format, either through a  telephone conversation or in person. | the RA provided age- and ability- appropriate inf ormational handouts on school readinessand/or performance. |  |
| Intervention type | Lifestyle | None |  |
| Intervention  length | 3 months | 3 months |  |
| Intensity as described by  author | Given that these phone callslasted approximately 15–30 minutes, this treatment w ouldf all under the category of ‘‘very low intensity’’ as defined byWhitlock and colleagues (as less than 10 hours  per year) | Handouts only |  |
| Assigned  intensity | <5 hours | <5 hours |  |
| Provider types | Primary care, researcher | Primary care, researcher |  |

| Clinic setting | Primary care | Primary care |
| --- | --- | --- |
| Components | Nutrition counseling, activity counseling, motivational interview ing | Usual care |

| Outcomes |  |  |  |  |
| --- | --- | --- | --- | --- |
| BMI SDS |  |  |  |  |
|  | 3 months |  |  |  |
|  | N | Mean | SE | p (across groups) |
| Intervention | 35 | -0.02 | 0.05 | 0.06 |
| Control | 36 | -0.08 | 0.05 |  |

**Taveras, Em; Gortmaker, Sl; Hohman, Kh; Horan, Cm; Kleinman, Kp; Mitchell, K; Price, S; Prosser, La; Rifas-Shiman, Sl; Gillman, Mw Randomized controlled trial to improve primary care to prevent and manage childhood obesity: the High Five for Kids study**

| Study  Identification |  |  |  |
| --- | --- | --- | --- |
| Sponsorship  source | This study w as supported by grant R01HD 050966 from the Eunice Kennedy Shriver NationalInstitute of Child Health and Human Development. | | |
| Country | USA |  |  |
| Methods | | | |
| Design | Cluster randomized controlled trial |  |  |
| Group | Parallel group |  |  |
| IRB | All study procedures w ere approved by the human subjects committee of Harvard Pilgrim Health Care. | |  |
| Outcomes other than  BMI | Behaviors |  |  |
| Population | | | |
| Inclusion criteria | Participants comprised children aged 2.0 to 6.9 years w hose BMI (calculated as w eight in kilograms divided by height in meters squared) w as in the 95th percentile or higher or w hose BMI w as in the 85th to less than 95th percentile if at least 1 parent w as overw eight (BMI >= 25) and w ho received their pediatric care  at Harvard Vanguard Medical Associates betw een August 2006 and October 2008. | | |
| Exclusion criteria | We excluded (1) children w hose parent or guardian could not respond to interview s in English or Spanish, (2) children w hose families w ere planning to leave  Harvard Vanguard Medical Associates, (3) families for w hom the primary care clinician thought the intervention w as not ap- propriate, and (4) children w ith chronic medical conditions | | |
| Group  differences | Randomized |  |  |
| Special  populations | Preschoolers are included |  |  |
|  | Intervention | Usual Care | Overall |
| N | 253 | 192 | 445 |
| Sex | 48% female | 49% female | 48% female |
| Age | 4.8 | 5.2 | 4.9 |
| Race | 47% w hite, 28% black, 19% Latino, 7% other | 70% w hite, 7% black, 14% Latino, 9% other | 57% w hite, 19% black, 17%  Latino, 8% other |
| BMI SDS | 1.88 | 1.82 | 1.85 |
| Interventions | |  |  |
|  | Intervention | Usual Care |  |
| Intervention as described by authors | Major components ofthe intervention involved changes to the health care system.We trained all members of the practice team to play an activerole in the intervention. We enhanced the electronic medicalrecord system to assist clinicians w ith decision support, pa-tient tracking,  follow -up, scheduling, and billing (Figure 1).After reorganization of the delivery of primary and acute care,the pediatric nurse practitioners conducted chronic disease man-agement visits w ith intervention participants. Prior to the startof the intervention, w e negotiated w ith the regional insurancecompanies to pay for up to 4 visits for both  overw eight and obesepatients in the first year of the study. We trained the pediatric nurse practitioners to be the keyintervening clinicians and  to use motivational interview ing | Participants randomized to usual care received the current stan- dard of care offered by their pediatric practice. This included w ell-child care visits and follow -up appointments for w eight checks w ith their pediatrician or a subspecialist (eg, nutrition- ist). Visits for families in the usual care group included the base- line and annual w ell-child care visits |  |
| Intervention  type | Lifestyle | Usual care |  |

| Intervention  length | 12 months | 12 months |
| --- | --- | --- |
| Intensity as  described by authors | four 25-minute, in-person chronic disease management vis-its and three 15-minute telephone calls in the first year of theintervention. | Usual care |
| Assigned  intensity | <5 hours | <5 hours |
| Provider  types | Primary care | Primary care |
| Clinic setting | Primary care | Primary care |
| Components | Nutrition counseling, activity counseling, motivational interview ing,  activity training (TV monitoring device to reduce TV View ing) | Usual care |

| Outcomes |  |  |  |  |
| --- | --- | --- | --- | --- |
| BMI |  |  |  |  |
|  | 1 year |  |  |  |
|  | N | Mean | SE | p (across groups) |
| Intervention | 253 | 19.5 | 0.09 | 0.15 |
| Usual Care | 192 | 0.49 | 0.1 |  |

**Taveras, Em; Marshall, R; Kleinman, Kp; Gillman, Mw; Hacker, K; Horan, Cm; Smith, Rl; Price, S; Sharifi, M; Rifas-Shiman, Sl; Simon, Sr Comparative effectiveness of childhood obesity interventions in pediatric primary care: a cluster-randomized clinical trial**

| Study  Identification |  |  |  |  |  |
| --- | --- | --- | --- | --- | --- |
| Sponsorship  source | This study w as supported by aw ard R18 AE000026 from the American Recovery and Reinvestment Act (Dr Taveras). | | |  |  |
| Country | USA |  |  |  |  |
| Methods | | | | | |
| Design | Cluster randomized controlled trial |  |  |  |  |
| Group | Parallel group |  |  |  |  |
| IRB | All study activities w ere approved by the institutional review board at Harvard Pilgrim Health Care, Boston, Massachusetts. | | |  |  |
| Outcomes other than  BMI | None |  |  |  |  |
| Population | | | | | |
| Inclusion  criteria | Eligibility for STAR includes 1) child is 6.0–12.9 years old at baseline, 2) child's BMI≥90th percentile for age and sex at the baseline w ell-child visit, 3) child has  received w ell childcare at HVMA w ithin the past 15 months, and 4) at least one parent can communicate in English. | | | | |
| Exclusion  criteria | Children w ere excluded if: 1) their sibling had already been enrolled in the study, 2) their family w as planning to leave HVMA w ithin the study time frame, 3) their  clinician did not feel the study w as appropriate for them or their families, or 4) they had a chronic medical condition that impacted their diet or physical activity. | | | | |
| Group  differences | Randomized |  |  |  |  |
| Special  Populations | Latino |  |  |  |  |
|  | CDS | CDS + coaching | Usual care | CDS vs CDS +  coaching | Overall |
| N Enrolled | 194 | 171 | 184 |  | 549 |
| Sex | 93 (47.9% female), 101 (52.1% male) | 80 (46.8% female), 91  (53.2% male) | 84 (45.7%)  female, 100  (54.3%) male |  | 257 (46.8%)  female, 292  (53.2%) male |
| Age in years | 9.8 (2.0) | 9.8 (1.8) | 9.8 (1.9) |  | 9.8 (1.9) |
| Race | 64.4% w hite, 16% black, 6.2% Latino, 4.6% Asian, 8.8% other | 43.5% w hite, 25.9%  black, 14.7% Latino,  5.3% Asian, 10.6%  other | 44.8% w hite,  22.4% black,  21.9% Latino,  4.9% Asian, 6.0%  other |  | 51.4% w hite,  21.2% black,  14.1% Latino,  4.9% Asian,  8.4% other |
| BMI | 25.6 (4.5) | 26.0 (4.2) | 25.7 (4.2) |  | 25.8 (4.3) |
| BMI z-score | 2.04 (0.30) | 2.08 (0.30) | 2.05 (0.30) |  | 2.06 (0.30) |
| Interventions | | | | | |
|  | CDS | CDS + coaching | Usual care | CDS vs CDS +  coaching |  |
| Intervention as defined by author | In the 10 practices randomized to the 2 intervention arms (CDS and CDS + coaching), w e modified the existing electronic health record to deploy a computerized, point-of-care CDS alert to pe- diatric clinicians at the time of a w ell- child visit for a child w ith a BMI at the 95th percentile or greater. 21 The alert contained links to grow th charts, 22 evidence-based childhood obesity screening  and management guidelines, 3 and a prepopulated standardized note template specific for obesity that included options for | CDS + In the CDS + coaching intervention arm, families w ere as- signed a health coach w ho used motivational  interview ing 23 to support families by | Participants at practices randomized to the control arm re- ceived the current  standard of care offered by their |  |  |

|  | (1)documentingandcodingf ortheBMIpercentile,(2)document- ing and coding for nutrition and physical activity counseling, (3) placing ref errals for w eight management programs, (4) plac- ing orders for laboratory studies if appropriate, and (5) printing educational materials. In these 10 practices, w e also trained the clinicians to use brief motivational interview ing to negotiate a follow -up w eight management plan w ith the patient and their family. These training sessions w ere conducted in person at each of the 10 sites during regularly scheduled clinical meetings and w ere led by expert faculty (E.M.T. and R.M.) and inf ormation technology specialists. tients at w ell-child and follow -up visits that focused on indi- vidual- and family-level behaviors (eFigure in Supplement 2). These behaviors included (1) decreases in screen time, (2) decreases in consumption of sugar-  sw eetened beverages, (3) increases in moderate and vigorous physical activity, and (4) improvement of sleep duration and quality. Families in the CDS arm also received 4 new sletters throughout the interven- tion period encouraging self -guided behavior change. | telephone at 1, 3, 6, and 9 months. Par- ents w ere also invited to participate in an interactive text mes- sage program. Any parent w ho chose not to receive texts had the option to receive the same messages by email. Texts re- ceived tw ice w eekly during the 1-year  follow -up provided sup- port for behavior change for the patient  and their family. A pre- vious STAR investigation 20 described the procedures and content of the text  message program | pediatric office. No new decision support tools for obesity w ere made available in the electronic health records of the 4 usual care practices |
| --- | --- | --- | --- |
| Intervention type (choose  one) | Lifestyle | Lifestyle | Usual care |
| Intervention  length | 12 months | 12 months | 12 months |
| Intensity as described by authors | Not specified - appear to occur at the usual care visits | support families by telephone at 1, 3, 6, and 9 months; Texts re- ceived tw ice  w eekly during the 1- year follow -up provided sup- port for behavior change for the patient and their  family. | Usual care visits |
| Assigned Intensity | <5 hrs | <5 hours | <5 hrs |
| Provider type (select  all) | primary care | primary care, mental health ("health coach") | primary care |
| Clinic setting (choose one—  probably) | primary care | primary care | primary care |
| Components (choose all) | nutrition counseling, activity counseling, sleep counseling | nutrition counseling,  activity counseling, sleep counseling | Usual care |

| Outc  omes |  |  |  |  |  |  |  |  |  |  |  |  |  |  |  |  |  |  |  |  |  |  |
| --- | --- | --- | --- | --- | --- | --- | --- | --- | --- | --- | --- | --- | --- | --- | --- | --- | --- | --- | --- | --- | --- | --- |
| BMI  z-  score |  |  |  |  |  |  |  |  |  |  |  |  |  |  |  |  |  |  |  |  |  |  |
|  | Init ial St ud y  Vis it |  |  |  |  |  |  |  |  |  |  | 1-  yea r Foll ow - up |  |  |  |  |  |  |  |  |  |  |
|  | Me an | S D | Mea n Cha nge | Unadj usted β Value | Unadj usted 95%  CI_lo w er bound | Unadj usted 95%  CI_up per bound | Unadj usted P-  Value | Adju sted β Valu e | Adju sted 95%  CI_l ow er boun  d | Adju sted 95%  CI_u pper boun  d | Adju sted P-  Valu e | Me an | S D | Mea n Cha nge | Unadj usted β Value | Unadj usted 95%  CI_lo w er bound | Unadj usted 95%  CI_up per bound | Unadj usted P-  Value | Adju sted β Valu e | Adju sted 95%  CI_l ow er boun  d | Adju sted 95%  CI_u pper boun  d | Adju sted P-  Valu e |
| CDS | 2.0  4 | 0  . 3 |  |  |  |  |  |  |  |  |  | 1.9  3 | 0.  3  9 | -0.1 | -0.06 | -0.1 | -0.01 |  | - 0.06 | - 0.11 | -0.02 |  |
| CDS  +  coac hing | 2.0  8 | 0  . 3 |  |  |  |  |  |  |  |  |  | 1.9  9 | 0.  3  5 | - 0.08 | -0.04 | -0.09 | 0.01 | 0.04 | - 0.05 | - 0.09 | 0 | 0.03 |
| Usual care | 2.0  5 | 0  . 3 |  |  |  |  |  |  |  |  |  | 2.0  1 | 0.  3  3 | - 0.04 |  |  |  |  |  |  |  |  |
| CDS  vs CDS  +  coac hing |  |  |  | -0.02 | -0.06 | 0.03 | 0.49 | - 0.02 | - 0.06 | 0.03 | 0.49 |  |  |  |  |  |  |  |  |  |  |  |
| BMI | | | | | | | | | | | | | | | | | | | | | | |
|  | Init ial St ud y  Vis it |  |  |  |  |  |  |  |  |  |  | 1-  yea r Foll ow - up |  |  |  |  |  |  |  |  |  |  |
|  | Me an | S D | Mea n Cha nge | Unadj usted β Value | Unadj usted 95%  CI_lo | Unadj usted 95%  CI_up | Unadj usted P-  Value | Adju sted β Valu  e | Adju sted 95%  CI_l  ow er | Adju sted 95%  CI_u  pper | Adju sted P-  Valu  e | Me an | S D | Mea n Cha nge | Unadj usted β Value | Unadj usted 95%  CI_lo | Unadj usted 95%  CI_up | Unadj usted P-  Value | Adju sted β Valu  e | Adju sted 95%  CI_l  ow er | Adju sted 95%  CI_u  pper | Adju sted P-  Valu  e |

|  |  |  | w er bound | per bound |  |  | boun d | boun d |  |  |  |  | w er bound | per bound |  |  | boun d | boun d |  |
| --- | --- | --- | --- | --- | --- | --- | --- | --- | --- | --- | --- | --- | --- | --- | --- | --- | --- | --- | --- |
| CDS | 25.  6 | 4  . 5 |  |  |  |  |  |  | 26.  3 | 4.  6 | 0.7 | -0.48 | -0.88 | -0.08 |  | - 0.51 | - 0.91 | -0.11 |  |
| CDS  +  coac hing | 26 | 4  . 2 |  |  |  |  |  |  | 26.  8 | 4.  6 | 0.9 | -0.32 | -0.73 | 0.09 | 0.06 | - 0.34 | - 0.75 | 0.07 | 0.04 |
| Usual care | 25.  7 | 4  . 2 |  |  |  |  |  |  | 26.  9 | 4.  6 | 1.2 |  |  |  |  |  |  |  |  |
| CDS  vs CDS  +  coac hing |  | -0.17 | -0.57 | 0.24 | 0.42 | - 0.17 | - 0.58 | 0.23 | 0.4 |  |  |  |  |  |  |  |  |  |  |

**Taveras, Em; Marshall, R; Sharifi, M; Avalon, E; Fiechtner, L; Horan, C; Gerber, Mw; John, Orav Eo; Price, Sn; Sequist, T; Slater, D Comparative effectiveness of clinical-community childhood obesity interventions a randomized clinical trial**

| Study  Identification |  |  |  |
| --- | --- | --- | --- |
| Sponsorship source | his w ork w as supported through aw ard IH-1304-6739 from the Patient- Centered Outcomes Research Institute. Dr Taveras w as also supported by K24 grant DK10589 from the National Institutes of Health. Dr Sharifi w as supported by grant K12 HS 022986 from the Agency for Healthcare Research and Quality. Dr Fiechtner w as supported by training grant T32 DK 007747 from the National Institute of Diabetes and Digestive and Kidney Diseases to the Division of  Gastroenterology and Nutrition and grant K12 HS022986 from the Agency for Healthcare Research and Quality. | | |
| Country | USA |  |  |
| Methods | | | |
| Design | Randomized controlled trial |  |  |
| Group | Parallel group |  |  |
| IRB | Study activities w ere approved by the Part-ners Health Care institutional review board. | |  |
| Outcomes  other than BMI | Psychosocial (quality of life) |  |  |
| Population | | | |
| Inclusion  criteria | Eligibility included the follow ing: (1) child age 2 to 12.9 years, (2)BMIin the85th or greater percentile,and(3) family not planning to leave HVMA w ithin the study  time frame. | | |
| Exclusion  criteria | None listed |  |  |
| Group  differences | Randomized |  |  |
| Special populations | None |  |  |
|  | Enhanced Primary Care | Enhanced Primary Care plus Coaching | Overall |
| N | 361 | 360 | 721 |
| Sex | 52.1% female | 50.0% female | 51% female |
| Age | 8 | 8.1 | 8 |
| Race | 37.1% w hite, 30.5% black, 23.5% Hispanic, 8.9% other | 32.9% w hite, 36.2% black, 20.1% Hispanic, 10.9% other | 35.0% w hite,  33.3% black,  21.8%  Hispanic, 9.9% other |
| BMI SDS | 1.91 | 1.87 | 1.88 |
| Interventions | |  |  |
|  | Enhanced Primary Care | Enhanced Primary Care plus Coaching |  |
[truncated: 367,780 more chars]
